# Supplementary material for: Development of Dairy Products Fortified with Plant Extracts: Antioxidant and Phenolic Content Characterization
Source: MDPI journal article supplement (doi:10.3390/antiox12020500), 2023-02-16
Supplement: s1 [file s1]

**Table S1.** The 162 different identified phytochemicals in the 9 studied plant materials. The compounds in blue color belong to the family of polyphenols.

| Sr. No | Phytochemical                                         |
|--------|-------------------------------------------------------|
| 1      | Rhoifolin                                             |
| 2      | Eriocitrin                                            |
| 3      | Apigenin-7-O-glucoside                                |
| 4      | Limonin                                               |
| 5      | Didymin                                               |
| 6      | Isorhamnetin-3-O-rutinoside                           |
| 7      | Isorhamnetin 3-O-galactoside                          |
| 8      | Citric acid                                           |
| 9      | Eupatilin                                             |
| 10     | Luteolin 7-O-diglucuronide                            |
| 11     | Quercetin-3-O-glucoside                               |
| 12     | Kaempferol 3-O-sophoroside                            |
| 13     | Myricetin 3- $\alpha$ -L-arabinopyranoside            |
| 14     | Manghaslin (Quercetin 3-2G-rhamnosylrutinoside)       |
| 15     | Orientin                                              |
| 16     | Rutin                                                 |
| 17     | Glucoalyssin                                          |
| 18     | Kaempferol 3-O-acetyl-glucoside                       |
| 19     | 1,2-Disinapoylgentiobiose                             |
| 20     | Spinacetin 3-O-glucosyl-(1 $\rightarrow$ 6)-glucoside |
| 21     | Glucogallin                                           |
| 22     | Cirsilineol                                           |
| 23     | D-(+)-Mannose                                         |
| 24     | Azadirachtin                                          |

|    |                                                                                                               |
|----|---------------------------------------------------------------------------------------------------------------|
| 25 | Patulitrin                                                                                                    |
| 26 | Bergenin                                                                                                      |
| 27 | Allobetonicoside                                                                                              |
| 28 | Nicotiflorin                                                                                                  |
| 29 | 5-Feruloylquinic acid                                                                                         |
| 30 | Neodiosmin                                                                                                    |
| 31 | Ferulic acid-4'-O-glucoside                                                                                   |
| 32 | Feruloyl C1-glucuronide                                                                                       |
| 33 | 3,4-Dicaffeoylquinic Acid                                                                                     |
| 34 | Isoscutellarein 7-O-[6'''-O-acetyl- $\beta$ -d-allopyranosyl-(1 $\rightarrow$ 2)]- $\beta$ -d-glucopyranoside |
| 35 | Salvianolic acid G                                                                                            |
| 36 | 9-F1-phytoprostane                                                                                            |
| 37 | Barbatoside C/D                                                                                               |
| 38 | Quercetin 3-arabinoside                                                                                       |
| 39 | Quercetin 3-O-(6''-acetyl-galactoside) 7-O-rhamnoside                                                         |
| 40 | 5,5'-Dicaffeic acid                                                                                           |
| 41 | Isoscutellarein 4'-methyl ether 7-(6'''-acetylallosyl)(1 $\rightarrow$ 2)-glucoside                           |
| 42 | 6''-O-Malonyldaidzin                                                                                          |
| 43 | Caffeoyl tartaric acid                                                                                        |
| 44 | Naringenin-4',5-diglucuronide                                                                                 |
| 45 | Luteolin 4'-glucoside                                                                                         |
| 46 | Apigenin 7-O-apiosyl-glucoside                                                                                |
| 47 | Kaempferol 3-O-(6''-acetyl-galactoside) 7-O-rhamnoside                                                        |
| 48 | Tragopogonic acid                                                                                             |
| 49 | Nobiletin                                                                                                     |
| 50 | Peonidin 3-O-sophoroside                                                                                      |

|    |                                                                  |
|----|------------------------------------------------------------------|
| 51 | Betonicine                                                       |
| 52 | Sucrose                                                          |
| 53 | Pelargonidin 3-O-rutinoside                                      |
| 54 | Luteolin 7-O-rutinoside                                          |
| 55 | Hexose                                                           |
| 56 | Chrysoeriol 7-O-apiosyl-glucoside                                |
| 57 | Cirsimaritin                                                     |
| 58 | 5,7-Dihydroxychromone                                            |
| 59 | Morroniside                                                      |
| 60 | Echinacoside                                                     |
| 61 | 6''-O-Acetylgenistin                                             |
| 62 | Leucosceptoside A                                                |
| 63 | Quercetin 3-rutinoside-7-glucoside                               |
| 64 | 5-(3'-hydroxyphenyl)-gamma-hydroxyvaleric acid -4'-O-glucuronide |
| 65 | Salvianolic acid B                                               |
| 66 | Rosmarinic acid                                                  |
| 67 | Genistein 4',7-O-diglucuronide                                   |
| 68 | Lithospermic acid                                                |
| 69 | Lithospermic acid B                                              |
| 70 | Scutellarin                                                      |
| 71 | Salvianolic acid C                                               |
| 72 | Pectolarigenin                                                   |
| 73 | Eupatorin                                                        |
| 74 | Vanillylmandelic acid                                            |
| 75 | Cynarin                                                          |
| 76 | Theaflavin 3-O-gallate                                           |

|     |                                                                |
|-----|----------------------------------------------------------------|
| 77  | Isorhamnetin 3-O-glucoside                                     |
| 78  | Juglanin                                                       |
| 79  | Cafestol (2-hydroxy-)                                          |
| 80  | Astilbin                                                       |
| 81  | Pinoresinol-4-O-Beta-Monoglycoside                             |
| 82  | 4-Hydroxy-5-(3',5'-dihydroxyphenyl)-valeric acid-O-glucuronide |
| 83  | 6''-O-Malonylgenistin                                          |
| 84  | Geniposidic-Acid                                               |
| 85  | Isoacteoside                                                   |
| 86  | Homoplantaginin_Tectoridin                                     |
| 87  | Kaempferol 3-rhamnosyl-(1->2)-rhamnosyl-(1->6)-glucoside       |
| 88  | Harpagide                                                      |
| 89  | Naringenin 7-O-glucoside                                       |
| 90  | Diosmin                                                        |
| 91  | Chicoric acid                                                  |
| 92  | Aucubin                                                        |
| 93  | Apigenin 7-O-diglucuronide                                     |
| 94  | Hispidulin glucuronide                                         |
| 95  | Acteoside                                                      |
| 96  | Silybin                                                        |
| 97  | Plumieride                                                     |
| 98  | Hydroxytyrosol 4-O-glucoside                                   |
| 99  | beta-D-Glcp-(1->4)-[L-alpha-D-Hepp-(1->3)]-L-alpha-D-Hepp      |
| 100 | Luteolin                                                       |
| 101 | alpha-Methyl-D-mannopyranoside                                 |
| 102 | Dihydroferulic acid 4-O-glucuronide                            |

|     |                                                                  |
|-----|------------------------------------------------------------------|
| 103 | Apigenin                                                         |
| 104 | Quercitrin (Quercetin-3-O-alpha-L-rhamnopyranoside)              |
| 105 | Luteolin-3-O-glucuronide                                         |
| 106 | Quercetin 3'-O-glucuronide                                       |
| 107 | Melittoside                                                      |
| 108 | Oleuropein                                                       |
| 109 | Astragalin                                                       |
| 110 | 5-O-Caffeoylquinic acid                                          |
| 111 | Genkwanin                                                        |
| 112 | Caffeic acid 4-O-glucoside                                       |
| 113 | Salvianolic Acid A                                               |
| 114 | 1,3-Dicaffeoylquinic acid                                        |
| 115 | Quercetin 3-O-beta-D-glucopyranosyl-7-O-alpha-L-rhamnopyranoside |
| 116 | Diosmetin                                                        |
| 117 | Dihydroferulic acid-4'-O-glucuronide                             |
| 118 | Luteolin 7-O-glucoside                                           |
| 119 | Silydianin                                                       |
| 120 | Achillolide A                                                    |
| 121 | Glucobrassicinapin                                               |
| 122 | Hesperidin                                                       |
| 123 | Isorhamnetin 3-O-glucoside 7-O-rhamnoside                        |
| 124 | Chrysoeriol                                                      |
| 125 | Hesperetin                                                       |
| 126 | Barbatoside A/B                                                  |
| 127 | kaempferol 3-O-rutinoside                                        |
| 128 | Antoside                                                         |

|     |                                                                                                                           |
|-----|---------------------------------------------------------------------------------------------------------------------------|
| 129 | Isorhamnetin 4'-O-glucuronide                                                                                             |
| 130 | Byakangelicin                                                                                                             |
| 131 | Myricetin-3-O- $\alpha$ -L-rhamnopyranoside                                                                               |
| 132 | Coumaroyl tartaric acid (p-)                                                                                              |
| 133 | Quercetin 3-O-(6-malonyl-glucoside)"                                                                                      |
| 134 | 4-O-Caffeoylquinic acid                                                                                                   |
| 135 | Valoneic acid dilactone                                                                                                   |
| 136 | 5-O-Galloylquinic acid                                                                                                    |
| 137 | Protocatechuic acid 4-O-glucoside                                                                                         |
| 138 | Taxifolin                                                                                                                 |
| 139 | Ascorbic acid (L-)                                                                                                        |
| 140 | Teupolioside                                                                                                              |
| 141 | Apigenin 7-(4''-E-p-coumarylglucoside)                                                                                    |
| 142 | Isoscutellarein 7-O-[6'-O-acetyl- $\beta$ -D-allopyranosyl-(1 $\rightarrow$ 2)]-6''-O-acetyl- $\beta$ -D-glucopyranoside" |
| 143 | Rhamnetin 3-glucoside                                                                                                     |
| 144 | Falcarindiol 3-acetate                                                                                                    |
| 145 | Apigenin 7-(2'',3''-diacetyl-hexocide)                                                                                    |
| 146 | Apigenin-7-O-glucuronide                                                                                                  |
| 147 | 5-O-Caffeoylshikimic acid                                                                                                 |
| 148 | Quercetin                                                                                                                 |
| 149 | Cinnamtannin A2                                                                                                           |
| 150 | Quercetin 3,4'-O-diglucoside                                                                                              |
| 151 | Anhydrochiisanogenoic acid                                                                                                |
| 152 | Amentoflavone                                                                                                             |
| 153 | Kaempferol                                                                                                                |
| 154 | Myricetin 7-glucoside                                                                                                     |

|     |                                 |
|-----|---------------------------------|
| 155 | Coumaroylquinic acid            |
| 156 | Quercetin 3-glucuronate         |
| 157 | Hyperoside                      |
| 158 | Naringenin 5-O-glucuronide      |
| 159 | Kaempferol-3-o-glucuronide      |
| 160 | Myricetin-3-O-galactopyranoside |
| 161 | Caffeic acid                    |
| 162 | Phloridzin                      |

**Table S2.** Identified compounds in bitter orange aqueous extract (ESI negative mode).

| Component name                                                                  | Neutral mass (Da) | Observed m/z | Mass error (ppm) | Mass error (mDa) | Formula                                         |
|---------------------------------------------------------------------------------|-------------------|--------------|------------------|------------------|-------------------------------------------------|
| 1,2-Disinapoylgentiobiose                                                       | 754,23203         | 753,2249     | 0,2              | 0,1              | C <sub>34</sub> H <sub>42</sub> O <sub>19</sub> |
| Isoscutellarein 7-O-[6'''-O-acetyl-β-d-allopyranosyl-(1→2)]-β-d-glucopyranoside | 652,16395         | 651,1574     | 1,2              | 0,8              | C <sub>29</sub> H <sub>32</sub> O <sub>17</sub> |
| Rhoifolin                                                                       | 578,16356         | 577,1565     | 0,3              | 0,2              | C <sub>27</sub> H <sub>30</sub> O <sub>14</sub> |
| Eriocitrin_1                                                                    | 596,17412         | 595,1673     | 0,8              | 0,4              | C <sub>27</sub> H <sub>32</sub> O <sub>15</sub> |
| Orientin                                                                        | 448,10056         | 447,0935     | 0,5              | 0,2              | C <sub>21</sub> H <sub>20</sub> O <sub>11</sub> |
| Salvianolic acid G                                                              | 418,09            | 417,0831     | 0,8              | 0,3              | C <sub>20</sub> H <sub>18</sub> O <sub>10</sub> |
| Kaempferol 3-O-acetyl-glucoside                                                 | 490,11113         | 489,1039     | 0,1              | 0,1              | C <sub>23</sub> H <sub>22</sub> O <sub>12</sub> |
| D-(+)-Mannose                                                                   | 180,06339         | 179,0563     | 0,9              | 0,2              | C <sub>6</sub> H <sub>12</sub> O <sub>6</sub>   |
| Nicotiflorin                                                                    | 594,15847         | 593,152      | 1,4              | 0,8              | C <sub>27</sub> H <sub>30</sub> O <sub>15</sub> |
| Didymine                                                                        | 594,19486         | 593,1873     | -0,4             | -0,3             | C <sub>28</sub> H <sub>34</sub> O <sub>14</sub> |
| 5-Feruloylquinic acid                                                           | 368,11073         | 367,1028     | -1,9             | -0,7             | C <sub>17</sub> H <sub>20</sub> O <sub>9</sub>  |
| Rutin                                                                           | 610,15338         | 609,1474     | 2,1              | 1,3              | C <sub>27</sub> H <sub>30</sub> O <sub>16</sub> |
| 3,4-Dicaffeoylquinic Acid                                                       | 516,12678         | 515,1199     | 0,7              | 0,4              | C <sub>25</sub> H <sub>24</sub> O <sub>12</sub> |
| Azadirachtin                                                                    | 720,26294         | 719,2538     | -2,6             | -1,9             | C <sub>35</sub> H <sub>44</sub> O <sub>16</sub> |



|                                                      |           |          |      |      |                                                 |
|------------------------------------------------------|-----------|----------|------|------|-------------------------------------------------|
| Ferulic acid-4'-O-glucoside                          | 356,11073 | 355,1031 | -1,1 | -0,4 | C <sub>16</sub> H <sub>20</sub> O <sub>9</sub>  |
| Eupatilin                                            | 344,0896  | 343,0821 | -0,8 | -0,3 | C <sub>18</sub> H <sub>16</sub> O <sub>7</sub>  |
| Kaempferol 3-O-sophoroside                           | 610,15338 | 609,1465 | 0,6  | 0,4  | C <sub>27</sub> H <sub>30</sub> O <sub>16</sub> |
| 9-F1-phytoprostane                                   | 328,22497 | 327,2174 | -1   | -0,3 | C <sub>18</sub> H <sub>32</sub> O <sub>5</sub>  |
| Barbatoside C/D                                      | 810,25824 | 809,2483 | -3,3 | -2,7 | C <sub>37</sub> H <sub>46</sub> O <sub>20</sub> |
| Limonin                                              | 470,19407 | 469,1864 | -0,7 | -0,4 | C <sub>26</sub> H <sub>30</sub> O <sub>8</sub>  |
| Isorhamnetin-3-O-rutinoside                          | 624,16903 | 623,1626 | 1,3  | 0,8  | C <sub>28</sub> H <sub>32</sub> O <sub>16</sub> |
| Quercetin 3-arabinoside                              | 434,08491 | 433,0784 | 1,8  | 0,8  | C <sub>20</sub> H <sub>18</sub> O <sub>11</sub> |
| Bergenin                                             | 328,07943 | 327,0717 | -1,3 | -0,4 | C <sub>14</sub> H <sub>16</sub> O <sub>9</sub>  |
| Cirsilineol_1                                        | 344,0896  | 343,0822 | -0,4 | -0,1 | C <sub>18</sub> H <sub>16</sub> O <sub>7</sub>  |
| Eriocitrin_2                                         | 596,17412 | 595,1657 | -1,8 | -1,1 | C <sub>27</sub> H <sub>32</sub> O <sub>15</sub> |
| Spinacetin 3-O-glucosyl-(1->6)-glucoside             | 670,17451 | 669,1682 | 1,5  | 1    | C <sub>29</sub> H <sub>34</sub> O <sub>18</sub> |
| Quercetin 3-O-(6"-acetyl-galactoside) 7-O-rhamnoside | 652,16395 | 651,155  | -2,6 | -1,7 | C <sub>29</sub> H <sub>32</sub> O <sub>17</sub> |
| Isorhamnetin 3-O-galactoside                         | 478,11113 | 477,1042 | 0,8  | 0,4  | C <sub>22</sub> H <sub>22</sub> O <sub>12</sub> |
| 5,5'-Dicafeic acid                                   | 358,06887 | 357,062  | 1,1  | 0,4  | C <sub>18</sub> H <sub>14</sub> O <sub>8</sub>  |
| Manghaslin (Quercetin 3-2G-rhamnosylrutinoside)      | 756,21129 | 755,2044 | 0,6  | 0,4  | C <sub>33</sub> H <sub>40</sub> O <sub>20</sub> |
| Isoscutellarein 4'-methyl ether 7-(6'''-             | 666,1796  | 665,1718 | -0,7 | -0,5 | C <sub>30</sub> H <sub>34</sub> O <sub>17</sub> |

|                                                                |           |          |      |      |                                                                 |
|----------------------------------------------------------------|-----------|----------|------|------|-----------------------------------------------------------------|
| acetylallosyl)(1->2)-<br>glucoside                             |           |          |      |      |                                                                 |
| Quercetin-3-O-glucoside                                        | 464,09548 | 463,0886 | 0,8  | 0,4  | C <sub>21</sub> H <sub>20</sub> O <sub>12</sub>                 |
| Allobetonicoside                                               | 506,16356 | 505,1558 | -1   | -0,5 | C <sub>21</sub> H <sub>30</sub> O <sub>14</sub>                 |
| Feruloyl C1-glucuronide                                        | 370,09    | 369,0826 | -0,3 | -0,1 | C <sub>16</sub> H <sub>18</sub> O <sub>10</sub>                 |
| Neodiosmin                                                     | 608,17412 | 607,166  | -1,3 | -0,8 | C <sub>28</sub> H <sub>32</sub> O <sub>15</sub>                 |
| Glucogallin                                                    | 332,07435 | 331,0681 | 3,1  | 1    | C <sub>13</sub> H <sub>16</sub> O <sub>10</sub>                 |
| Apigenin-7-O-glucoside                                         | 432,10565 | 431,0984 | 0,2  | 0,1  | C <sub>21</sub> H <sub>20</sub> O <sub>10</sub>                 |
| 6''-O-Malonyldaidzin                                           | 502,11113 | 501,104  | 0,3  | 0,1  | C <sub>24</sub> H <sub>22</sub> O <sub>12</sub>                 |
| Caffeoyl tartaric acid                                         | 312,04813 | 311,0406 | -0,8 | -0,2 | C <sub>13</sub> H <sub>12</sub> O <sub>9</sub>                  |
| Naringenin-4',5-<br>diglucuronide                              | 608,13773 | 607,13   | -0,8 | -0,5 | C <sub>27</sub> H <sub>28</sub> O <sub>16</sub>                 |
| Luteolin 4'-glucoside                                          | 448,10056 | 447,0927 | -1,2 | -0,5 | C <sub>21</sub> H <sub>20</sub> O <sub>11</sub>                 |
| Apigenin 7-O-apiosyl-<br>glucoside                             | 564,14791 | 563,1417 | 1,9  | 1    | C <sub>26</sub> H <sub>28</sub> O <sub>14</sub>                 |
| Patulitrin                                                     | 494,10604 | 493,0976 | -2,4 | -1,2 | C <sub>22</sub> H <sub>22</sub> O <sub>13</sub>                 |
| Kaempferol 3-O-(6''-<br>acetyl-galactoside) 7-O-<br>rhamnoside | 636,16903 | 635,1591 | -4,2 | -2,7 | C <sub>29</sub> H <sub>32</sub> O <sub>16</sub>                 |
| Luteolin 7-O-<br>diglucuronide_1                               | 638,11191 | 637,1023 | -3,6 | -2,3 | C <sub>27</sub> H <sub>26</sub> O <sub>18</sub>                 |
| Glucoalyssin                                                   | 451,06406 | 450,0586 | 4    | 1,8  | C <sub>13</sub> H <sub>25</sub> NO <sub>10</sub> S <sub>3</sub> |
| Tragopogonic acid                                              | 288,06339 | 287,0558 | -1,1 | -0,3 | C <sub>15</sub> H <sub>12</sub> O <sub>6</sub>                  |
| Citric acid                                                    | 192,027   | 191,0194 | -1,7 | -0,3 | C <sub>6</sub> H <sub>8</sub> O <sub>7</sub>                    |
| Myricetin 3- $\alpha$ -L-<br>arabinopyranoside                 | 450,07983 | 449,0735 | 2    | 0,9  | C <sub>20</sub> H <sub>18</sub> O <sub>12</sub>                 |

**Table S3.** Identified compounds in bitter orange aqueous extract (ESI positive mode).

| Component name                                                                                                | Neutral mass (Da) | Observed m/z | Mass error (ppm) | Mass error (mDa) | Formula                                         |
|---------------------------------------------------------------------------------------------------------------|-------------------|--------------|------------------|------------------|-------------------------------------------------|
| Rhoifolin                                                                                                     | 578,16356         | 579,1708     | 0                | 0                | C <sub>27</sub> H <sub>30</sub> O <sub>14</sub> |
| Nobiletin                                                                                                     | 402,13147         | 425,1198     | -2               | -0,9             | C <sub>21</sub> H <sub>22</sub> O <sub>8</sub>  |
| Peonidin 3-O-sophoroside                                                                                      | 625,17686         | 625,1764     | 0,1              | 0,1              | C <sub>28</sub> H <sub>33</sub> O <sub>16</sub> |
| Betonicine                                                                                                    | 159,08954         | 160,0965     | -2,1             | -0,3             | C <sub>7</sub> H <sub>13</sub> NO <sub>3</sub>  |
| 1,2-Disinapoylgentiobiose                                                                                     | 754,23203         | 777,2219     | 0,8              | 0,6              | C <sub>34</sub> H <sub>42</sub> O <sub>19</sub> |
| Tragopogonic acid                                                                                             | 288,06339         | 289,07       | -2,4             | -0,7             | C <sub>15</sub> H <sub>12</sub> O <sub>6</sub>  |
| Isoscutellarein 7-O-[6'''-O-acetyl- $\beta$ -d-allopyranosyl-(1 $\rightarrow$ 2)]- $\beta$ -d-glucopyranoside | 652,16395         | 653,1725     | 2                | 1,3              | C <sub>29</sub> H <sub>32</sub> O <sub>17</sub> |
| Orientin                                                                                                      | 448,10056         | 449,1077     | -0,4             | -0,2             | C <sub>21</sub> H <sub>20</sub> O <sub>11</sub> |
| Sucrose                                                                                                       | 342,11621         | 365,1054     | 0                | 0                | C <sub>12</sub> H <sub>22</sub> O <sub>11</sub> |
| Pelargonidin 3-O-rutinoside                                                                                   | 579,17138         | 579,171      | 0,3              | 0,2              | C <sub>27</sub> H <sub>31</sub> O <sub>14</sub> |
| Luteolin 7-O-rutinoside                                                                                       | 594,15847         | 595,1657     | -0,1             | -0,1             | C <sub>27</sub> H <sub>30</sub> O <sub>15</sub> |
| Hexose                                                                                                        | 180,06339         | 203,0525     | -0,5             | -0,1             | C <sub>6</sub> H <sub>12</sub> O <sub>6</sub>   |
| Limonin                                                                                                       | 470,19407         | 471,2007     | -1,3             | -0,6             | C <sub>26</sub> H <sub>30</sub> O <sub>8</sub>  |

|                                                                  |           |          |      |      |                                                 |
|------------------------------------------------------------------|-----------|----------|------|------|-------------------------------------------------|
| Chrysoeriol 7-O-apiosyl-glucoside                                | 594,15847 | 595,1659 | 0,3  | 0,2  | C <sub>27</sub> H <sub>30</sub> O <sub>15</sub> |
| 9-F1-phytoprostane                                               | 328,22497 | 351,213  | -3,5 | -1,2 | C <sub>18</sub> H <sub>32</sub> O <sub>5</sub>  |
| Eupatilin                                                        | 344,0896  | 345,0961 | -2,2 | -0,8 | C <sub>18</sub> H <sub>16</sub> O <sub>7</sub>  |
| Kaempferol 3-O-sophoroside                                       | 610,15338 | 611,1615 | 1,3  | 0,8  | C <sub>27</sub> H <sub>30</sub> O <sub>16</sub> |
| Eriocitrin_1                                                     | 596,17412 | 597,182  | 1,1  | 0,6  | C <sub>27</sub> H <sub>32</sub> O <sub>15</sub> |
| Cirsimaritin                                                     | 314,07904 | 315,0859 | -1,3 | -0,4 | C <sub>17</sub> H <sub>14</sub> O <sub>6</sub>  |
| Didymin                                                          | 594,19486 | 617,1826 | -2,4 | -1,5 | C <sub>28</sub> H <sub>34</sub> O <sub>14</sub> |
| 5,7-Dihydroxychromone                                            | 178,02661 | 179,0336 | -1,4 | -0,2 | C <sub>9</sub> H <sub>6</sub> O <sub>4</sub>    |
| Morroniside                                                      | 406,14751 | 429,1362 | -1,4 | -0,6 | C <sub>17</sub> H <sub>26</sub> O <sub>11</sub> |
| Echinacoside                                                     | 786,25824 | 787,2643 | -1,5 | -1,2 | C <sub>35</sub> H <sub>46</sub> O <sub>20</sub> |
| 6"-O-Acetylgenistin                                              | 474,11621 | 475,1216 | -4   | -1,9 | C <sub>23</sub> H <sub>22</sub> O <sub>11</sub> |
| Leucosceptoside A                                                | 638,22107 | 661,2118 | 2,2  | 1,5  | C <sub>30</sub> H <sub>38</sub> O <sub>15</sub> |
| Rutin                                                            | 610,15338 | 633,1437 | 1,7  | 1,1  | C <sub>27</sub> H <sub>30</sub> O <sub>16</sub> |
| Quercetin 3-rutinoside-7-glucoside                               | 772,20621 | 773,2131 | -0,6 | -0,4 | C <sub>33</sub> H <sub>40</sub> O <sub>21</sub> |
| Quercetin 3-arabinoside                                          | 434,08491 | 457,0736 | -1,3 | -0,6 | C <sub>20</sub> H <sub>18</sub> O <sub>11</sub> |
| 5-(3'-hydroxyphenyl)-gamma-hydroxyvaleric acid -4'-O-glucuronide | 402,11621 | 403,1223 | -3   | -1,2 | C <sub>17</sub> H <sub>22</sub> O <sub>11</sub> |

**Table S4.** Identified compounds in dittany aqueous extract (ESI negative mode).

| Component name                 | Neutral mass (Da) | Observed m/z | Mass error (ppm) | Mass error (mDa) | Formula                                         |
|--------------------------------|-------------------|--------------|------------------|------------------|-------------------------------------------------|
| Salvianolic acid B_1           | 718,15338         | 717,1451     | -1,5             | -1,1             | C <sub>36</sub> H <sub>30</sub> O <sub>16</sub> |
| Luteolin 7-O-diglucuronide_1   | 638,11191         | 637,1052     | 0,9              | 0,6              | C <sub>27</sub> H <sub>26</sub> O <sub>18</sub> |
| Rosmarinic acid                | 360,08452         | 359,0778     | 1,6              | 0,6              | C <sub>18</sub> H <sub>16</sub> O <sub>8</sub>  |
| Genistein 4',7-O-diglucuronide | 622,117           | 621,1101     | 0,6              | 0,3              | C <sub>27</sub> H <sub>26</sub> O <sub>17</sub> |
| Lithospermic acid_1            | 538,11113         | 537,1045     | 1,2              | 0,7              | C <sub>27</sub> H <sub>22</sub> O <sub>12</sub> |
| ferulic acid-4'-O-glucoside    | 718,15338         | 717,1465     | 0,5              | 0,4              | C <sub>36</sub> H <sub>30</sub> O <sub>16</sub> |
| Cirsilineol_1                  | 344,0896          | 343,0824     | 0,3              | 0,1              | C <sub>18</sub> H <sub>16</sub> O <sub>7</sub>  |
| 9-F1-phytoprostane             | 328,22497         | 327,2177     | 0                | 0                | C <sub>18</sub> H <sub>32</sub> O <sub>5</sub>  |
| Scutellarin                    | 462,07983         | 461,0733     | 1,6              | 0,7              | C <sub>21</sub> H <sub>18</sub> O <sub>12</sub> |
| Salvianolic acid C             | 492,10565         | 491,0984     | 0,1              | 0                | C <sub>26</sub> H <sub>20</sub> O <sub>10</sub> |
| Pectolinarigenin               | 314,07904         | 313,072      | 0,8              | 0,2              | C <sub>17</sub> H <sub>14</sub> O <sub>6</sub>  |
| Orientin                       | 448,10056         | 447,0937     | 0,8              | 0,4              | C <sub>21</sub> H <sub>20</sub> O <sub>11</sub> |
| Eupatorin                      | 344,0896          | 343,0828     | 1,4              | 0,5              | C <sub>18</sub> H <sub>16</sub> O <sub>7</sub>  |
| Vanillylmandelic acid          | 198,05282         | 197,0456     | 0,5              | 0,1              | C <sub>9</sub> H <sub>10</sub> O <sub>5</sub>   |
| Cynarin                        | 516,12678         | 515,119      | -0,9             | -0,5             | C <sub>25</sub> H <sub>24</sub> O <sub>12</sub> |
| Rutin                          | 610,15338         | 609,1463     | 0,3              | 0,2              | C <sub>27</sub> H <sub>30</sub> O <sub>16</sub> |
| Theaflavin 3-O-gallate_1       | 716,13773         | 715,131      | 0,7              | 0,5              | C <sub>36</sub> H <sub>28</sub> O <sub>16</sub> |
| Isorhamnetin 3-O-glucoside     | 478,11113         | 477,1046     | 1,6              | 0,8              | C <sub>22</sub> H <sub>22</sub> O <sub>12</sub> |
| Juglanin                       | 418,09            | 417,0831     | 0,8              | 0,3              | C <sub>20</sub> H <sub>18</sub> O <sub>10</sub> |
| 3,4-Dicaffeoylquinic Acid      | 516,12678         | 515,1182     | -2,5             | -1,3             | C <sub>25</sub> H <sub>24</sub> O <sub>12</sub> |

|                                                                |           |          |      |      |                                                 |
|----------------------------------------------------------------|-----------|----------|------|------|-------------------------------------------------|
| Cafestol (2-hydroxy-)                                          | 332,19876 | 331,1908 | -2   | -0,6 | C <sub>20</sub> H <sub>28</sub> O <sub>4</sub>  |
| Chrysoeriol 7-O-apiosyl-glucoside                              | 594,15847 | 593,1514 | 0,4  | 0,3  | C <sub>27</sub> H <sub>30</sub> O <sub>15</sub> |
| Isorhamnetin 3-O-galactoside                                   | 478,11113 | 477,1049 | 2,2  | 1    | C <sub>22</sub> H <sub>22</sub> O <sub>12</sub> |
| Ferulic acid-4'-O-glucoside                                    | 356,11073 | 355,1037 | 0,7  | 0,2  | C <sub>16</sub> H <sub>20</sub> O <sub>9</sub>  |
| Astilbin                                                       | 450,11621 | 449,1095 | 1,3  | 0,6  | C <sub>21</sub> H <sub>22</sub> O <sub>11</sub> |
| Kaempferol 3-O-sophoroside                                     | 610,15338 | 609,1459 | -0,3 | -0,2 | C <sub>27</sub> H <sub>30</sub> O <sub>16</sub> |
| Pinoresinol-4-O-Beta-Monoglycoside                             | 520,19446 | 519,1894 | 4,2  | 2,2  | C <sub>26</sub> H <sub>32</sub> O <sub>11</sub> |
| 4-Hydroxy-5-(3',5'-dihydroxyphenyl)-valeric acid-O-glucuronide | 402,11621 | 401,1091 | 0,5  | 0,2  | C <sub>17</sub> H <sub>22</sub> O <sub>11</sub> |
| Glucogallin                                                    | 332,07435 | 331,0672 | 0,4  | 0,1  | C <sub>13</sub> H <sub>16</sub> O <sub>10</sub> |
| Naringenin-4',5-diglucuronide                                  | 608,13773 | 607,129  | -2,4 | -1,5 | C <sub>27</sub> H <sub>28</sub> O <sub>16</sub> |
| 6"-O-Malonylgenistin                                           | 518,10604 | 517,0985 | -0,5 | -0,2 | C <sub>24</sub> H <sub>22</sub> O <sub>13</sub> |
| Geniposidic-Acid                                               | 374,1213  | 373,1139 | -0,3 | -0,1 | C <sub>16</sub> H <sub>22</sub> O <sub>10</sub> |
| Isoacteoside                                                   | 624,20542 | 623,1954 | -4,4 | -2,7 | C <sub>29</sub> H <sub>36</sub> O <sub>15</sub> |
| Homoplantagin_Tectoridin                                       | 462,11621 | 461,1091 | 0,4  | 0,2  | C <sub>22</sub> H <sub>22</sub> O <sub>11</sub> |
| Kaempferol 3-rhamnosyl-(1->2)-rhamnosyl-(1->6)-glucoside       | 740,21638 | 739,2074 | -2,3 | -1,7 | C <sub>33</sub> H <sub>40</sub> O <sub>19</sub> |
| Harpagide                                                      | 364,13695 | 363,1281 | -4,3 | -1,6 | C <sub>15</sub> H <sub>24</sub> O <sub>10</sub> |
| Naringenin 7-O-glucoside                                       | 434,1213  | 433,112  | -4,7 | -2,1 | C <sub>21</sub> H <sub>22</sub> O <sub>10</sub> |
| Diosmin                                                        | 608,17412 | 607,1664 | -0,7 | -0,4 | C <sub>28</sub> H <sub>32</sub> O <sub>15</sub> |
| Chicoric acid                                                  | 474,07983 | 473,0715 | -2,2 | -1   | C <sub>22</sub> H <sub>18</sub> O <sub>12</sub> |
| Aucubin                                                        | 346,12638 | 345,1188 | -0,8 | -0,3 | C <sub>15</sub> H <sub>22</sub> O <sub>9</sub>  |

**Table S5.** Identified compounds in dittany aqueous extract (ESI positive mode).

| Component name                 | Neutral mass (Da) | Observed m/z | Mass error (ppm) | Mass error (mDa) | Formula                                         |
|--------------------------------|-------------------|--------------|------------------|------------------|-------------------------------------------------|
| Luteolin 7-O-diglucuronide_1   | 638,11191         | 639,1202     | 1,5              | 1                | C <sub>27</sub> H <sub>26</sub> O <sub>18</sub> |
| Genistein 4',7-O-diglucuronide | 622,117           | 623,1253     | 1,7              | 1                | C <sub>27</sub> H <sub>26</sub> O <sub>17</sub> |
| Salvianolic acid B_1           | 718,15338         | 741,1427     | 0,1              | 0,1              | C <sub>36</sub> H <sub>30</sub> O <sub>16</sub> |
| Scutellarin                    | 462,07983         | 463,0874     | 0,7              | 0,3              | C <sub>21</sub> H <sub>18</sub> O <sub>12</sub> |
| Cirsilineol_1                  | 344,0896          | 345,0965     | -1,1             | -0,4             | C <sub>18</sub> H <sub>16</sub> O <sub>7</sub>  |
| 9-F1-phytoprostane             | 328,22497         | 351,2134     | -2,4             | -0,8             | C <sub>18</sub> H <sub>32</sub> O <sub>5</sub>  |
| Lithospermic acid              | 538,11113         | 561,1011     | 1,4              | 0,8              | C <sub>27</sub> H <sub>22</sub> O <sub>12</sub> |
| Sucrose                        | 342,11621         | 365,1052     | -0,6             | -0,2             | C <sub>12</sub> H <sub>22</sub> O <sub>11</sub> |
| Eupatorin                      | 344,0896          | 345,0963     | -1,8             | -0,6             | C <sub>18</sub> H <sub>16</sub> O <sub>7</sub>  |
| Pectolinarigenin               | 314,07904         | 315,0861     | -0,6             | -0,2             | C <sub>17</sub> H <sub>14</sub> O <sub>6</sub>  |
| Orientin                       | 448,10056         | 449,1082     | 0,7              | 0,3              | C <sub>21</sub> H <sub>20</sub> O <sub>11</sub> |
| Hexose                         | 180,06339         | 203,0524     | -1,1             | -0,2             | C <sub>6</sub> H <sub>12</sub> O <sub>6</sub>   |
| Lithospermic acid B            | 718,15338         | 741,144      | 1,9              | 1,4              | C <sub>36</sub> H <sub>30</sub> O <sub>16</sub> |
| Apigenin 7-O-diglucuronide     | 622,117           | 645,1072     | 1,6              | 1                | C <sub>27</sub> H <sub>26</sub> O <sub>17</sub> |
| Hispidulin glucuronide         | 476,09548         | 477,1028     | 0,1              | 0                | C <sub>22</sub> H <sub>20</sub> O <sub>12</sub> |

|                                                           |           |          |      |      |                                                 |
|-----------------------------------------------------------|-----------|----------|------|------|-------------------------------------------------|
| Chrysoeriol 7-O-apiosyl-glucoside                         | 594,15847 | 595,1666 | 1,5  | 0,9  | C <sub>27</sub> H <sub>30</sub> O <sub>15</sub> |
| Rosmarinic acid                                           | 360,08452 | 383,0734 | -0,8 | -0,3 | C <sub>18</sub> H <sub>16</sub> O <sub>8</sub>  |
| Acteoside                                                 | 624,20542 | 647,1954 | 1,2  | 0,8  | C <sub>29</sub> H <sub>36</sub> O <sub>15</sub> |
| 3,4-Dicaffeoylquinic Acid                                 | 516,12678 | 539,1176 | 3    | 1,6  | C <sub>25</sub> H <sub>24</sub> O <sub>12</sub> |
| Salvianolic acid C                                        | 492,10565 | 515,0944 | -0,9 | -0,4 | C <sub>26</sub> H <sub>20</sub> O <sub>10</sub> |
| Silybin                                                   | 482,1213  | 505,1118 | 2,5  | 1,3  | C <sub>25</sub> H <sub>22</sub> O <sub>10</sub> |
| Plumieride                                                | 470,14243 | 471,1478 | -3,9 | -1,9 | C <sub>21</sub> H <sub>26</sub> O <sub>12</sub> |
| Hydroxytyrosol 4-O-glucoside                              | 316,11582 | 339,1046 | -1,3 | -0,4 | C <sub>14</sub> H <sub>20</sub> O <sub>8</sub>  |
| beta-D-Glcp-(1->4)-[L-alpha-D-Hepp-(1->3)]-L-alpha-D-Hepp | 564,19016 | 587,1767 | -4,5 | -2,6 | C <sub>20</sub> H <sub>36</sub> O <sub>18</sub> |
| 5-Feruloylquinic acid                                     | 368,11073 | 391,101  | 2,8  | 1,1  | C <sub>17</sub> H <sub>20</sub> O <sub>9</sub>  |
| Vanillylmandelic acid                                     | 198,05282 | 221,043  | 4,4  | 1    | C <sub>9</sub> H <sub>10</sub> O <sub>5</sub>   |

**Table S6.** Identified compounds in lavender aqueous extract (ESI negative mode).

| Component name               | Neutral mass (Da) | Observed m/z | Mass error (ppm) | Mass error (mDa) | Formula                                         |
|------------------------------|-------------------|--------------|------------------|------------------|-------------------------------------------------|
| Luteolin 7-O-diglucuronide_2 | 638,11191         | 637,1054     | 1,2              | 0,8              | C <sub>27</sub> H <sub>26</sub> O <sub>18</sub> |



|                                                     |           |          |      |      |                                                 |
|-----------------------------------------------------|-----------|----------|------|------|-------------------------------------------------|
| Scutellarin                                         | 462,07983 | 461,0729 | 0,8  | 0,4  | C <sub>21</sub> H <sub>18</sub> O <sub>12</sub> |
| Salvianolic acid B_2                                | 718,15338 | 717,147  | 1,2  | 0,9  | C <sub>36</sub> H <sub>30</sub> O <sub>16</sub> |
| Caffeoyl tartaric acid                              | 312,04813 | 311,0413 | 1,4  | 0,4  | C <sub>13</sub> H <sub>12</sub> O <sub>9</sub>  |
| Lithospermic acid_1                                 | 538,11113 | 537,104  | 0,3  | 0,2  | C <sub>27</sub> H <sub>22</sub> O <sub>12</sub> |
| Rosmarinic acid                                     | 360,08452 | 359,0776 | 1    | 0,4  | C <sub>18</sub> H <sub>16</sub> O <sub>8</sub>  |
| Luteolin                                            | 286,04774 | 285,0407 | 0,9  | 0,3  | C <sub>15</sub> H <sub>10</sub> O <sub>6</sub>  |
| alpha-Methyl-D-mannopyranoside                      | 194,07904 | 193,0717 | -0,2 | 0    | C <sub>7</sub> H <sub>14</sub> O <sub>6</sub>   |
| 9-F1-phytoprostane                                  | 328,22497 | 327,2176 | -0,4 | -0,1 | C <sub>18</sub> H <sub>32</sub> O <sub>5</sub>  |
| ferulic acid-4'-O-glucoside                         | 198,05282 | 197,0458 | 1,2  | 0,2  | C <sub>9</sub> H <sub>10</sub> O <sub>5</sub>   |
| Dihydroferulic acid 4-O-glucuronide                 | 372,10565 | 371,0989 | 1,4  | 0,5  | C <sub>16</sub> H <sub>20</sub> O <sub>10</sub> |
| Apigenin-7-O-glucoside                              | 432,10565 | 431,0987 | 0,8  | 0,3  | C <sub>21</sub> H <sub>20</sub> O <sub>10</sub> |
| D-(+)-Mannose                                       | 180,06339 | 179,0562 | 0,4  | 0,1  | C <sub>6</sub> H <sub>12</sub> O <sub>6</sub>   |
| Naringenin-4',5-diglucuronide                       | 608,13773 | 607,13   | -0,7 | -0,4 | C <sub>27</sub> H <sub>28</sub> O <sub>16</sub> |
| Apigenin                                            | 270,05282 | 269,0456 | 0,3  | 0,1  | C <sub>15</sub> H <sub>10</sub> O <sub>5</sub>  |
| Pinoresinol-4-O-Beta-Monoglycoside                  | 520,19446 | 519,188  | 1,6  | 0,8  | C <sub>26</sub> H <sub>32</sub> O <sub>11</sub> |
| Ferulic acid-4'-O-glucoside                         | 356,11073 | 355,1035 | 0,1  | 0    | C <sub>16</sub> H <sub>20</sub> O <sub>9</sub>  |
| Quercitrin (Quercetin-3-O-alpha-L-rhamnopyranoside) | 448,10056 | 447,0941 | 1,8  | 0,8  | C <sub>21</sub> H <sub>20</sub> O <sub>11</sub> |

|                                                                |           |          |      |      |                                                 |
|----------------------------------------------------------------|-----------|----------|------|------|-------------------------------------------------|
| 4-Hydroxy-5-(3',5'-dihydroxyphenyl)-valeric acid-O-glucuronide | 402,11621 | 401,1109 | 4,9  | 2    | C <sub>17</sub> H <sub>22</sub> O <sub>11</sub> |
| Isorhamnetin 3-O-galactoside                                   | 478,11113 | 477,104  | 0,3  | 0,1  | C <sub>22</sub> H <sub>22</sub> O <sub>12</sub> |
| Hispidulin glucuronide                                         | 476,09548 | 475,0886 | 0,9  | 0,4  | C <sub>22</sub> H <sub>20</sub> O <sub>12</sub> |
| Luteolin-3-O-glucuronide                                       | 462,07983 | 461,0732 | 1,4  | 0,6  | C <sub>21</sub> H <sub>18</sub> O <sub>12</sub> |
| Quercetin 3'-O-glucuronide                                     | 478,07474 | 477,0678 | 0,7  | 0,4  | C <sub>21</sub> H <sub>18</sub> O <sub>13</sub> |
| Chicoric acid                                                  | 474,07983 | 473,0735 | 2    | 0,9  | C <sub>22</sub> H <sub>18</sub> O <sub>12</sub> |
| Melittoside                                                    | 524,17412 | 523,165  | -3,5 | -1,9 | C <sub>21</sub> H <sub>32</sub> O <sub>15</sub> |
| Oleuropein                                                     | 540,18429 | 539,176  | -1,8 | -1   | C <sub>25</sub> H <sub>32</sub> O <sub>13</sub> |
| Theaflavin 3-O-gallate_1                                       | 716,13773 | 715,1317 | 1,7  | 1,2  | C <sub>36</sub> H <sub>28</sub> O <sub>16</sub> |
| Aucubin                                                        | 346,12638 | 345,1198 | 1,9  | 0,7  | C <sub>15</sub> H <sub>22</sub> O <sub>9</sub>  |
| Silybin                                                        | 482,1213  | 481,1124 | -3,3 | -1,6 | C <sub>25</sub> H <sub>22</sub> O <sub>10</sub> |

**Table S7.** Identified compounds in lavender aqueous extract (ESI positive mode).

| Component name               | Neutral mass (Da) | Observed m/z | Mass error (ppm) | Mass error (mDa) | Formula                                         |
|------------------------------|-------------------|--------------|------------------|------------------|-------------------------------------------------|
| Luteolin 7-O-diglucuronide_1 | 638,11191         | 639,119      | -0,3             | -0,2             | C <sub>27</sub> H <sub>26</sub> O <sub>18</sub> |
| Scutellarin                  | 462,07983         | 463,0874     | 0,7              | 0,3              | C <sub>21</sub> H <sub>18</sub> O <sub>12</sub> |

|                                                           |           |          |      |      |                                                 |
|-----------------------------------------------------------|-----------|----------|------|------|-------------------------------------------------|
| Apigenin-7-O-glucoside                                    | 432,10565 | 433,1133 | 0,8  | 0,4  | C <sub>21</sub> H <sub>20</sub> O <sub>10</sub> |
| Sucrose                                                   | 342,11621 | 365,105  | -1,1 | -0,4 | C <sub>12</sub> H <sub>22</sub> O <sub>11</sub> |
| Hexose                                                    | 180,06339 | 203,0522 | -1,9 | -0,4 | C <sub>6</sub> H <sub>12</sub> O <sub>6</sub>   |
| Pinoresinol-4-O-Beta-Monoglycoside                        | 520,19446 | 543,1846 | 1,7  | 0,9  | C <sub>26</sub> H <sub>32</sub> O <sub>11</sub> |
| Salvianolic acid B_2                                      | 718,15338 | 741,1436 | 1,4  | 1    | C <sub>36</sub> H <sub>30</sub> O <sub>16</sub> |
| Caffeoyl tartaric acid                                    | 312,04813 | 335,0371 | -0,8 | -0,3 | C <sub>13</sub> H <sub>12</sub> O <sub>9</sub>  |
| Cynarin                                                   | 516,12678 | 539,1187 | 5    | 2,7  | C <sub>25</sub> H <sub>24</sub> O <sub>12</sub> |
| Hispidulin glucuronide                                    | 476,09548 | 477,1043 | 3,2  | 1,5  | C <sub>22</sub> H <sub>20</sub> O <sub>12</sub> |
| Astragalin                                                | 448,10056 | 449,1085 | 1,6  | 0,7  | C <sub>21</sub> H <sub>20</sub> O <sub>11</sub> |
| Acteoside                                                 | 624,20542 | 647,1955 | 1,3  | 0,8  | C <sub>29</sub> H <sub>36</sub> O <sub>15</sub> |
| Luteolin 4'-glucoside                                     | 448,10056 | 471,0903 | 1    | 0,5  | C <sub>21</sub> H <sub>20</sub> O <sub>11</sub> |
| Salvianolic acid C                                        | 492,10565 | 493,1134 | 0,9  | 0,5  | C <sub>26</sub> H <sub>20</sub> O <sub>10</sub> |
| Kaempferol 3-rhamnosyl-(1->2)-rhamnosyl-(1->6)-glucoside  | 740,21638 | 763,2092 | 4,8  | 3,6  | C <sub>33</sub> H <sub>40</sub> O <sub>19</sub> |
| 5-Feruloylquinic acid                                     | 368,11073 | 391,1005 | 1,3  | 0,5  | C <sub>17</sub> H <sub>20</sub> O <sub>9</sub>  |
| beta-D-Glcp-(1->4)-[L-alpha-D-Hepp-(1->3)]-L-alpha-D-Hepp | 564,19016 | 587,1796 | 0,3  | 0,2  | C <sub>20</sub> H <sub>36</sub> O <sub>18</sub> |

|                                                                        |           |          |     |     |                                                 |
|------------------------------------------------------------------------|-----------|----------|-----|-----|-------------------------------------------------|
| alpha-Methyl-D-mannopyranoside                                         | 194,07904 | 194,079  | 2,7 | 0,5 | C <sub>7</sub> H <sub>14</sub> O <sub>6</sub>   |
| 5-O-Caffeoylquinic acid                                                | 354,09508 | 377,0861 | 4,7 | 1,8 | C <sub>16</sub> H <sub>18</sub> O <sub>9</sub>  |
| Isoscutellarein 4'-methyl ether 7-(6'''-acetylallosyl)(1->2)-glucoside | 666,1796  | 667,1901 | 4,8 | 3,2 | C <sub>30</sub> H <sub>34</sub> O <sub>17</sub> |

**Table S8.** Identified compounds in lemon balm aqueous extract (ESI negative mode).

| Component name           | Neutral mass (Da) | Observed m/z | Mass error (ppm) | Mass error (mDa) | Formula                                         |
|--------------------------|-------------------|--------------|------------------|------------------|-------------------------------------------------|
| Lithospermic acid B      | 718,15338         | 717,1465     | 0,6              | 0,4              | C <sub>36</sub> H <sub>30</sub> O <sub>16</sub> |
| Rosmarinic acid          | 360,08452         | 359,0778     | 1,5              | 0,5              | C <sub>18</sub> H <sub>16</sub> O <sub>8</sub>  |
| Theaflavin 3-O-gallate_1 | 716,13773         | 715,1308     | 0,5              | 0,4              | C <sub>36</sub> H <sub>28</sub> O <sub>16</sub> |
| Chicoric acid            | 474,07983         | 473,0731     | 1,1              | 0,5              | C <sub>22</sub> H <sub>18</sub> O <sub>12</sub> |
| Caffeoyl tartaric acid   | 312,04813         | 311,0411     | 0,7              | 0,2              | C <sub>13</sub> H <sub>12</sub> O <sub>9</sub>  |
| Salvianolic acid B_1     | 718,15338         | 717,1464     | 0,4              | 0,3              | C <sub>36</sub> H <sub>30</sub> O <sub>16</sub> |
| 9-F1-phytoprostane       | 328,22497         | 327,2183     | 1,9              | 0,6              | C <sub>18</sub> H <sub>32</sub> O <sub>5</sub>  |
| Salvianolic acid B_2     | 718,15338         | 717,1462     | 0,1              | 0,1              | C <sub>36</sub> H <sub>30</sub> O <sub>16</sub> |
| Luteolin                 | 286,04774         | 285,0407     | 0,7              | 0,2              | C <sub>15</sub> H <sub>10</sub> O <sub>6</sub>  |
| Vanillylmandelic acid    | 198,05282         | 197,0456     | 0                | 0                | C <sub>9</sub> H <sub>10</sub> O <sub>5</sub>   |
| Genkwanin                | 284,06847         | 283,0612     | -0,2             | 0                | C <sub>16</sub> H <sub>12</sub> O <sub>5</sub>  |

|                                                                  |           |          |      |      |                                                 |
|------------------------------------------------------------------|-----------|----------|------|------|-------------------------------------------------|
| Caffeic acid 4-O-glucoside                                       | 342,09508 | 341,0877 | -0,2 | -0,1 | C <sub>15</sub> H <sub>18</sub> O <sub>9</sub>  |
| Salvianolic Acid A                                               | 494,1213  | 493,1137 | -0,6 | -0,3 | C <sub>26</sub> H <sub>22</sub> O <sub>10</sub> |
| 1,3-Dicaffeoylquinic acid                                        | 516,12678 | 515,1184 | -2,1 | -1,1 | C <sub>25</sub> H <sub>24</sub> O <sub>12</sub> |
| Nicotiflorin                                                     | 594,15847 | 593,1505 | -1,2 | -0,7 | C <sub>26</sub> H <sub>30</sub> O <sub>15</sub> |
| Isorhamnetin 3-O-galactoside                                     | 478,11113 | 477,1044 | 1,1  | 0,5  | C <sub>22</sub> H <sub>22</sub> O <sub>12</sub> |
| Quercitrin<br>(Quercetin-3-O-alpha-L-rhamnopyranoside)           | 448,10056 | 447,093  | -0,6 | -0,3 | C <sub>21</sub> H <sub>20</sub> O <sub>11</sub> |
| Naringenin-4',5-diglucuronide                                    | 608,13773 | 607,129  | -2,4 | -1,4 | C <sub>26</sub> H <sub>28</sub> O <sub>16</sub> |
| Quercetin 3-O-beta-D-glucopyranosyl-7-O-alpha-L-rhamnopyranoside | 610,15338 | 609,1443 | -2,9 | -1,8 | C <sub>26</sub> H <sub>30</sub> O <sub>16</sub> |
| Kaempferol 3-O-(6''-acetyl-galactoside) 7-O-rhamnoside           | 636,16903 | 635,1596 | -3,3 | -2,1 | C <sub>29</sub> H <sub>32</sub> O <sub>16</sub> |
| Diosmetin                                                        | 300,06339 | 299,0558 | -1,2 | -0,4 | C <sub>16</sub> H <sub>12</sub> O <sub>6</sub>  |
| Dihydroferulic acid-4'-O-glucuronide                             | 372,10565 | 371,0974 | -2,6 | -0,9 | C <sub>16</sub> H <sub>20</sub> O <sub>10</sub> |
| Leucosceptoside A                                                | 638,22107 | 637,2151 | 2,1  | 1,3  | C <sub>30</sub> H <sub>38</sub> O <sub>15</sub> |
| 6''-O-Malonyldaidzin                                             | 502,11113 | 501,1042 | 0,7  | 0,4  | C <sub>24</sub> H <sub>22</sub> O <sub>12</sub> |
| Acteoside                                                        | 624,20542 | 623,2007 | 4,1  | 2,6  | C <sub>29</sub> H <sub>36</sub> O <sub>15</sub> |

**Table S9.** Identified compounds in lemon balm aqueous extract (ESI positive mode).

| Component name               | Neutral mass (Da) | Observed m/z | Mass error (ppm) | Mass error (mDa) | Formula                                         |
|------------------------------|-------------------|--------------|------------------|------------------|-------------------------------------------------|
| Luteolin-3-O-glucuronide     | 462,07983         | 463,0868     | -0,7             | -0,3             | C <sub>21</sub> H <sub>18</sub> O <sub>12</sub> |
| 9-F1-phytoprostane           | 328,22497         | 351,2135     | -1,9             | -0,7             | C <sub>18</sub> H <sub>32</sub> O <sub>5</sub>  |
| Sucrose                      | 342,11621         | 365,1047     | -2               | -0,7             | C <sub>12</sub> H <sub>22</sub> O <sub>11</sub> |
| Luteolin                     | 286,04774         | 287,0547     | -1,1             | -0,3             | C <sub>15</sub> H <sub>10</sub> O <sub>6</sub>  |
| Luteolin 7-O-glucoside       | 448,10056         | 449,1081     | 0,6              | 0,3              | C <sub>21</sub> H <sub>20</sub> O <sub>11</sub> |
| Hexose                       | 180,06339         | 203,0522     | -2,1             | -0,4             | C <sub>6</sub> H <sub>12</sub> O <sub>6</sub>   |
| Salvianolic acid B_1         | 718,15338         | 741,1425     | -0,2             | -0,1             | C <sub>36</sub> H <sub>30</sub> O <sub>16</sub> |
| Caffeoyl tartaric acid       | 312,04813         | 335,0371     | -0,7             | -0,2             | C <sub>13</sub> H <sub>12</sub> O <sub>9</sub>  |
| Theaflavin 3-O-gallate_1     | 716,13773         | 739,1272     | 0,3              | 0,2              | C <sub>36</sub> H <sub>28</sub> O <sub>16</sub> |
| Luteolin 4'-glucoside        | 448,10056         | 449,1078     | 0                | 0                | C <sub>21</sub> H <sub>20</sub> O <sub>11</sub> |
| Nicotiflorin                 | 594,15847         | 595,1649     | -1,3             | -0,8             | C <sub>27</sub> H <sub>30</sub> O <sub>15</sub> |
| Lithospermic acid B          | 718,15338         | 741,1439     | 1,8              | 1,3              | C <sub>36</sub> H <sub>30</sub> O <sub>16</sub> |
| Luteolin 7-O-diglucuronide_1 | 638,11191         | 639,1209     | 2,7              | 1,7              | C <sub>27</sub> H <sub>26</sub> O <sub>18</sub> |
| Lithospermic acid_1          | 538,11113         | 539,119      | 1                | 0,6              | C <sub>27</sub> H <sub>22</sub> O <sub>12</sub> |

|                                                 |           |          |      |      |                                                                |
|-------------------------------------------------|-----------|----------|------|------|----------------------------------------------------------------|
| Hydroxytyrosol 4-O-glucoside                    | 316,11582 | 339,1043 | -2,3 | -0,8 | C <sub>14</sub> H <sub>20</sub> O <sub>8</sub>                 |
| Acteoside                                       | 624,20542 | 625,2105 | -3,6 | -2,2 | C <sub>29</sub> H <sub>36</sub> O <sub>15</sub>                |
| Leucosceptoside A                               | 638,22107 | 661,2089 | -2,1 | -1,4 | C <sub>30</sub> H <sub>38</sub> O <sub>15</sub>                |
| Silydianin                                      | 482,1213  | 483,1273 | -2,6 | -1,3 | C <sub>25</sub> H <sub>22</sub> O <sub>10</sub>                |
| Manghaslin (Quercetin 3-2G-rhamnosylrutinoside) | 756,21129 | 779,2003 | -0,3 | -0,2 | C <sub>33</sub> H <sub>40</sub> O <sub>20</sub>                |
| Echinacoside                                    | 786,25824 | 809,2456 | -2,3 | -1,9 | C <sub>35</sub> H <sub>46</sub> O <sub>20</sub>                |
| Vanillylmandelic acid                           | 198,05282 | 221,0411 | -4,4 | -1   | C <sub>9</sub> H <sub>10</sub> O <sub>5</sub>                  |
| Achillolide A                                   | 306,11034 | 329,1002 | 2,1  | 0,7  | C <sub>16</sub> H <sub>18</sub> O <sub>6</sub>                 |
| Silybin                                         | 482,1213  | 505,11   | -1   | -0,5 | C <sub>25</sub> H <sub>22</sub> O <sub>10</sub>                |
| Glucobrassicinapin                              | 387,06577 | 388,0724 | -1,6 | -0,6 | C <sub>12</sub> H <sub>21</sub> NO <sub>9</sub> S <sub>2</sub> |

**Table S10.** Identified compounds in lemon peel aqueous extract (ESI negative mode).

| Component name                                                                  | Neutral mass (Da) | Observed m/z | Mass error (ppm) | Mass error (mDa) | Formula                                         |
|---------------------------------------------------------------------------------|-------------------|--------------|------------------|------------------|-------------------------------------------------|
| Eriocitrin_1                                                                    | 596,17412         | 595,1646     | -3,7             | -2,2             | C <sub>27</sub> H <sub>32</sub> O <sub>15</sub> |
| Isoscutellarein 7-O-[6'''-O-acetyl-β-d-allopyranosyl-(1→2)]-β-d-glucopyranoside | 652,16395         | 651,1571     | 0,7              | 0,4              | C <sub>29</sub> H <sub>32</sub> O <sub>17</sub> |
| Nicotiflorin                                                                    | 594,15847         | 593,1519     | 1,2              | 0,7              | C <sub>27</sub> H <sub>30</sub> O <sub>15</sub> |
| Hesperidin                                                                      | 610,18977         | 609,1825     | 0                | 0                | C <sub>28</sub> H <sub>34</sub> O <sub>15</sub> |
| Rutin                                                                           | 610,15338         | 609,1471     | 1,6              | 1                | C <sub>27</sub> H <sub>30</sub> O <sub>16</sub> |

|                                                                |           |          |      |      |                                                 |
|----------------------------------------------------------------|-----------|----------|------|------|-------------------------------------------------|
| 6''-O-Malonyldaidzin                                           | 502,11113 | 501,1042 | 0,8  | 0,4  | C <sub>24</sub> H <sub>22</sub> O <sub>12</sub> |
| Isorhamnetin 3-O-glucoside 7-O-rhamnoside                      | 624,16903 | 623,1621 | 0,5  | 0,3  | C <sub>28</sub> H <sub>32</sub> O <sub>16</sub> |
| D-(+)-Mannose                                                  | 180,06339 | 179,0563 | 0,9  | 0,2  | C <sub>6</sub> H <sub>12</sub> O <sub>6</sub>   |
| Salvianolic acid G                                             | 418,09    | 417,0828 | 0,1  | 0    | C <sub>20</sub> H <sub>18</sub> O <sub>10</sub> |
| Diosmin                                                        | 608,17412 | 607,1671 | 0,4  | 0,2  | C <sub>28</sub> H <sub>32</sub> O <sub>15</sub> |
| Chrysoeriol                                                    | 300,06339 | 299,056  | -0,5 | -0,2 | C <sub>16</sub> H <sub>12</sub> O <sub>6</sub>  |
| Limonin                                                        | 470,19407 | 469,1868 | 0    | 0    | C <sub>26</sub> H <sub>30</sub> O <sub>8</sub>  |
| Orientin                                                       | 448,10056 | 447,0937 | 1    | 0,4  | C <sub>21</sub> H <sub>20</sub> O <sub>11</sub> |
| 9-F1-phytoprostane                                             | 328,22497 | 327,2175 | -0,6 | -0,2 | C <sub>18</sub> H <sub>32</sub> O <sub>5</sub>  |
| Chrysoeriol 7-O-apiosyl-glucoside                              | 594,15847 | 593,1517 | 0,9  | 0,5  | C <sub>27</sub> H <sub>30</sub> O <sub>15</sub> |
| Azadirachtin                                                   | 720,26294 | 719,2533 | -3,2 | -2,3 | C <sub>35</sub> H <sub>44</sub> O <sub>16</sub> |
| Isorhamnetin-3-O-rutinoside                                    | 624,16903 | 623,1604 | -2,2 | -1,3 | C <sub>28</sub> H <sub>32</sub> O <sub>16</sub> |
| Hesperetin                                                     | 302,07904 | 301,0713 | -1,4 | -0,4 | C <sub>16</sub> H <sub>14</sub> O <sub>6</sub>  |
| Ferulic acid-4'-O-glucoside                                    | 356,11073 | 355,1051 | 4,5  | 1,6  | C <sub>16</sub> H <sub>20</sub> O <sub>9</sub>  |
| Isorhamnetin 3-O-galactoside                                   | 478,11113 | 477,1042 | 0,7  | 0,3  | C <sub>22</sub> H <sub>22</sub> O <sub>12</sub> |
| Astilbin                                                       | 450,11621 | 449,1089 | -0,1 | -0,1 | C <sub>21</sub> H <sub>22</sub> O <sub>11</sub> |
| 4-Hydroxy-5-(3',5'-dihydroxyphenyl)-valeric acid-O-glucuronide | 402,11621 | 401,1092 | 0,7  | 0,3  | C <sub>17</sub> H <sub>22</sub> O <sub>11</sub> |
| Naringenin-4',5-diglucuronide                                  | 608,13773 | 607,1275 | -4,9 | -3   | C <sub>27</sub> H <sub>28</sub> O <sub>16</sub> |
| Barbatoside A/B                                                | 664,22146 | 663,2146 | 0,6  | 0,4  | C <sub>28</sub> H <sub>40</sub> O <sub>18</sub> |
| Allobetonicoside                                               | 506,16356 | 505,1562 | -0,1 | -0,1 | C <sub>21</sub> H <sub>30</sub> O <sub>14</sub> |
| 6''-O-Malonylgenistin                                          | 518,10604 | 517,0993 | 0,9  | 0,5  | C <sub>24</sub> H <sub>22</sub> O <sub>13</sub> |



|                                                        |           |          |      |      |                                                 |
|--------------------------------------------------------|-----------|----------|------|------|-------------------------------------------------|
| kaempferol 3-O-rutinoside                              | 594,15847 | 593,1522 | 1,6  | 1    | C <sub>27</sub> H <sub>30</sub> O <sub>15</sub> |
| Quercetin-3-O-glucoside                                | 464,09548 | 463,0885 | 0,6  | 0,3  | C <sub>21</sub> H <sub>20</sub> O <sub>12</sub> |
| Antoside                                               | 610,15338 | 609,1449 | -2   | -1,2 | C <sub>27</sub> H <sub>30</sub> O <sub>16</sub> |
| Isorhamnetin 4'-O-glucuronide                          | 492,09039 | 491,0826 | -1,1 | -0,5 | C <sub>22</sub> H <sub>20</sub> O <sub>13</sub> |
| Kaempferol 3-O-(6''-acetyl-galactoside) 7-O-rhamnoside | 636,16903 | 635,1595 | -3,5 | -2,2 | C <sub>29</sub> H <sub>32</sub> O <sub>16</sub> |
| Isorhamnetin 3-O-glucoside                             | 478,11113 | 477,1022 | -3,4 | -1,6 | C <sub>22</sub> H <sub>22</sub> O <sub>12</sub> |
| ;Homoplantagin_Tectoridin                              | 462,11621 | 461,1072 | -3,7 | -1,7 | C <sub>22</sub> H <sub>22</sub> O <sub>11</sub> |
| Pinoresinol-4-O-Beta-Monoglycoside                     | 520,19446 | 519,1866 | -1,1 | -0,6 | C <sub>26</sub> H <sub>32</sub> O <sub>11</sub> |
| Geniposidic-Acid                                       | 374,1213  | 373,1141 | 0,2  | 0,1  | C <sub>16</sub> H <sub>22</sub> O <sub>10</sub> |
| Luteolin 7-O-glucoside                                 | 448,10056 | 447,0933 | 0,1  | 0,1  | C <sub>21</sub> H <sub>20</sub> O <sub>11</sub> |
| Apigenin 7-O-apiosyl-glucoside                         | 564,14791 | 563,1395 | -2   | -1,1 | C <sub>26</sub> H <sub>28</sub> O <sub>14</sub> |
| Citric acid                                            | 192,027   | 191,0194 | -1,6 | -0,3 | C <sub>6</sub> H <sub>8</sub> O <sub>7</sub>    |
| Hispidulin glucuronide                                 | 476,09548 | 475,0871 | -2,4 | -1,1 | C <sub>22</sub> H <sub>20</sub> O <sub>12</sub> |
| Rosmarinic acid                                        | 360,08452 | 359,079  | 4,9  | 1,7  | C <sub>18</sub> H <sub>16</sub> O <sub>8</sub>  |

**Table S11.** Identified compounds in lemon peel aqueous extract (ESI positive mode).

| Component name           | Neutral mass (Da) | Observed m/z | Mass error (ppm) | Mass error (mDa) | Formula                                         |
|--------------------------|-------------------|--------------|------------------|------------------|-------------------------------------------------|
| Peonidin 3-O-sophoroside | 625,17686         | 625,1766     | 0,5              | 0,3              | C <sub>28</sub> H <sub>33</sub> O <sub>16</sub> |
| Byakangelicin            | 334,10525         | 357,0936     | -2,4             | -0,8             | C <sub>17</sub> H <sub>18</sub> O <sub>7</sub>  |

|                                                                                 |           |          |      |      |                                                 |
|---------------------------------------------------------------------------------|-----------|----------|------|------|-------------------------------------------------|
| Nicotiflorin                                                                    | 594,15847 | 595,1661 | 0,6  | 0,4  | C <sub>27</sub> H <sub>30</sub> O <sub>15</sub> |
| Limonin                                                                         | 470,19407 | 471,2009 | -1   | -0,5 | C <sub>26</sub> H <sub>30</sub> O <sub>8</sub>  |
| Isoscutellarein 7-O-[6'''-O-acetyl-β-d-allopyranosyl-(1→2)]-β-d-glucopyranoside | 652,16395 | 653,1711 | -0,2 | -0,1 | C <sub>29</sub> H <sub>32</sub> O <sub>17</sub> |
| Eriocitrin_1                                                                    | 596,17412 | 619,1636 | 0,4  | 0,2  | C <sub>27</sub> H <sub>32</sub> O <sub>15</sub> |
| Nobiletin                                                                       | 402,13147 | 403,1381 | -1,6 | -0,7 | C <sub>21</sub> H <sub>22</sub> O <sub>8</sub>  |
| Hesperidin                                                                      | 610,18977 | 633,1788 | -0,4 | -0,2 | C <sub>28</sub> H <sub>34</sub> O <sub>15</sub> |
| Rutin                                                                           | 610,15338 | 611,1615 | 1,3  | 0,8  | C <sub>27</sub> H <sub>30</sub> O <sub>16</sub> |
| Isorhamnetin 3-O-glucoside 7-O-rhamnoside                                       | 624,16903 | 625,177  | 1,1  | 0,7  | C <sub>28</sub> H <sub>32</sub> O <sub>16</sub> |
| 1,3-Dicaffeoylquinic acid                                                       | 516,12678 | 517,1322 | -3,5 | -1,8 | C <sub>25</sub> H <sub>24</sub> O <sub>12</sub> |
| Chrysoeriol 7-O-apiosyl-glucoside                                               | 594,15847 | 595,1663 | 1    | 0,6  | C <sub>27</sub> H <sub>30</sub> O <sub>15</sub> |
| Myricetin-3-O-α-L-rhamnopyranoside                                              | 464,09548 | 465,103  | 0,5  | 0,2  | C <sub>21</sub> H <sub>20</sub> O <sub>12</sub> |
| Coumaroyl tartaric acid (p-)                                                    | 296,05322 | 297,0607 | 0,8  | 0,2  | C <sub>13</sub> H <sub>12</sub> O <sub>8</sub>  |
| Isorhamnetin-3-O-rutinoside                                                     | 624,16903 | 647,1587 | 0,7  | 0,5  | C <sub>28</sub> H <sub>32</sub> O <sub>16</sub> |
| Quercetin 3-O-beta-D-glucopyranosyl-7-O-alpha-L-rhamnopyranoside                | 610,15338 | 611,1619 | 2    | 1,2  | C <sub>27</sub> H <sub>30</sub> O <sub>16</sub> |

|                                          |           |          |      |      |                                                 |
|------------------------------------------|-----------|----------|------|------|-------------------------------------------------|
| Spinacetin 3-O-glucosyl-(1->6)-glucoside | 670,17451 | 670,1764 | 3,7  | 2,5  | C <sub>29</sub> H <sub>34</sub> O <sub>18</sub> |
| Quercetin 3-O-(6-malonyl-glucoside)"     | 550,09587 | 551,1027 | -0,8 | -0,4 | C <sub>24</sub> H <sub>22</sub> O <sub>15</sub> |
| 4-O-Caffeoylquinic acid                  | 354,09508 | 377,0839 | -1,2 | -0,4 | C <sub>16</sub> H <sub>18</sub> O <sub>9</sub>  |
| Cirsimaritin                             | 314,07904 | 315,085  | -4,3 | -1,4 | C <sub>17</sub> H <sub>14</sub> O <sub>6</sub>  |
| Astilbin                                 | 450,11621 | 473,1043 | -2,4 | -1,1 | C <sub>21</sub> H <sub>22</sub> O <sub>11</sub> |
| Pinoresinol-4-O-Beta-Monoglycoside       | 520,19446 | 520,1923 | -3,2 | -1,7 | C <sub>26</sub> H <sub>32</sub> O <sub>11</sub> |

**Table S12.** Identified compounds in rosehip aqueous extract (ESI negative mode).

| Component name                    | Neutral mass (Da) | Observed m/z | Mass error (ppm) | Mass error (mDa) | Formula                                         |
|-----------------------------------|-------------------|--------------|------------------|------------------|-------------------------------------------------|
| Astilbin                          | 450,11621         | 449,1091     | 0,3              | 0,2              | C <sub>21</sub> H <sub>22</sub> O <sub>11</sub> |
| Valoneic acid dilactone           | 470,01214         | 469,0048     | -0,1             | -0,1             | C <sub>21</sub> H <sub>10</sub> O <sub>13</sub> |
| 5-O-Galloylquinic acid            | 344,07435         | 343,0676     | 1,5              | 0,5              | C <sub>14</sub> H <sub>16</sub> O <sub>10</sub> |
| Protocatechuic acid 4-O-glucoside | 316,07943         | 315,0724     | 0,9              | 0,3              | C <sub>13</sub> H <sub>16</sub> O <sub>9</sub>  |
| Nicotiflorin                      | 594,15847         | 593,1484     | -4,7             | -2,8             | C <sub>27</sub> H <sub>30</sub> O <sub>15</sub> |
| Taxifolin                         | 304,0583          | 303,0509     | -0,5             | -0,2             | C <sub>15</sub> H <sub>12</sub> O <sub>7</sub>  |

|                                      |           |          |      |      |                                                 |
|--------------------------------------|-----------|----------|------|------|-------------------------------------------------|
| Ascorbic acid (L-)                   | 176,03209 | 175,025  | 1    | 0,2  | C <sub>6</sub> H <sub>8</sub> O <sub>6</sub>    |
| Quercetin 3-arabinoside              | 434,08491 | 433,0776 | -0,2 | -0,1 | C <sub>20</sub> H <sub>18</sub> O <sub>11</sub> |
| Sucrose                              | 342,11621 | 341,1095 | 1,6  | 0,6  | C <sub>12</sub> H <sub>22</sub> O <sub>11</sub> |
| Dihydroferulic acid 4-O-glucuronide  | 372,10565 | 371,0972 | -3,2 | -1,2 | C <sub>16</sub> H <sub>20</sub> O <sub>10</sub> |
| Melittoside                          | 524,17412 | 523,1661 | -1,5 | -0,8 | C <sub>21</sub> H <sub>32</sub> O <sub>15</sub> |
| Diosmin                              | 608,17412 | 607,1659 | -1,5 | -0,9 | C <sub>28</sub> H <sub>32</sub> O <sub>15</sub> |
| Apigenin 7-O-diglucuronide           | 622,117   | 621,1095 | -0,3 | -0,2 | C <sub>27</sub> H <sub>26</sub> O <sub>17</sub> |
| Dihydroferulic acid-4'-O-glucuronide | 372,10565 | 371,099  | 1,8  | 0,7  | C <sub>16</sub> H <sub>20</sub> O <sub>10</sub> |

**Table S13.** Identified compounds in rosehip aqueous extract (ESI positive mode).

| Component name          | Neutral mass (Da) | Observed m/z | Mass error (ppm) | Mass error (mDa) | Formula                                         |
|-------------------------|-------------------|--------------|------------------|------------------|-------------------------------------------------|
| Hexose                  | 180,06339         | 203,0525     | -0,7             | -0,1             | C <sub>6</sub> H <sub>12</sub> O <sub>6</sub>   |
| Valoneic acid dilactone | 470,01214         | 471,0189     | -1,1             | -0,5             | C <sub>21</sub> H <sub>10</sub> O <sub>13</sub> |
| Astilbin                | 450,11621         | 451,1234     | -0,3             | -0,1             | C <sub>21</sub> H <sub>22</sub> O <sub>11</sub> |
| Teupolioside            | 786,25824         | 786,2544     | -4,2             | -3,3             | C <sub>35</sub> H <sub>46</sub> O <sub>20</sub> |
| 9-F1-phytoprostane      | 328,22497         | 351,2131     | -3,1             | -1,1             | C <sub>18</sub> H <sub>32</sub> O <sub>5</sub>  |

|                                |           |          |      |      |                                                 |
|--------------------------------|-----------|----------|------|------|-------------------------------------------------|
| alpha-Methyl-D-mannopyranoside | 194,07904 | 217,0692 | 4,1  | 0,9  | C <sub>7</sub> H <sub>14</sub> O <sub>6</sub>   |
| Genistein 4',7-O-diglucuronide | 622,117   | 623,1232 | -1,7 | -1   | C <sub>27</sub> H <sub>26</sub> O <sub>17</sub> |
| 6''-O-Malonylgenistin          | 518,10604 | 541,0926 | -4,9 | -2,6 | C <sub>24</sub> H <sub>22</sub> O <sub>13</sub> |

**Table S14.** Identified compounds in sideritis aqueous extract (ESI negative mode).

| Component name                                                                  | Neutral mass (Da) | Observed m/z | Mass error (ppm) | Mass error (mDa) | Formula                                         |
|---------------------------------------------------------------------------------|-------------------|--------------|------------------|------------------|-------------------------------------------------|
| Acteoside                                                                       | 624,20542         | 623,198      | -0,2             | -0,1             | C <sub>29</sub> H <sub>36</sub> O <sub>15</sub> |
| Isoscutellarein 4'-methyl ether 7-(6'''-acetylallosyl)(1→2)-glucoside           | 666,1796          | 665,1727     | 0,5              | 0,4              | C <sub>30</sub> H <sub>34</sub> O <sub>17</sub> |
| 9-F1-phytoprostane                                                              | 328,22497         | 327,2178     | 0,4              | 0,1              | C <sub>18</sub> H <sub>32</sub> O <sub>5</sub>  |
| Isoscutellarein 7-O-[6'''-O-acetyl-β-d-allopyranosyl-(1→2)]-β-d-glucopyranoside | 652,16395         | 651,1574     | 1,1              | 0,7              | C <sub>29</sub> H <sub>32</sub> O <sub>17</sub> |
| Apigenin 7-(4''-E-p-coumarylglucoside)                                          | 578,14243         | 577,1352     | 0,2              | 0,1              | C <sub>30</sub> H <sub>26</sub> O <sub>12</sub> |
| Apigenin-7-O-glucoside                                                          | 432,10565         | 431,0984     | 0,1              | 0                | C <sub>21</sub> H <sub>20</sub> O <sub>10</sub> |
| Teupolioside                                                                    | 786,25824         | 785,25       | -1,3             | -1               | C <sub>35</sub> H <sub>46</sub> O <sub>20</sub> |

|                                                                                            |           |                      |      |      |                                                 |
|--------------------------------------------------------------------------------------------|-----------|----------------------|------|------|-------------------------------------------------|
| Bergenin                                                                                   | 328,07943 | 327,0722             | 0,2  | 0,1  | C <sub>14</sub> H <sub>16</sub> O <sub>9</sub>  |
| Apigenin                                                                                   | 270,05282 | 269,0458             | 0,9  | 0,2  | C <sub>15</sub> H <sub>10</sub> O <sub>5</sub>  |
| Cirsilineol_1                                                                              | 344,0896  | 343,0825             | 0,4  | 0,2  | C <sub>18</sub> H <sub>16</sub> O <sub>7</sub>  |
| Kaempferol 3-O-sophoroside                                                                 | 610,15338 | 609,1466             | 0,8  | 0,5  | C <sub>27</sub> H <sub>30</sub> O <sub>16</sub> |
| Leucosceptoside A                                                                          | 638,22107 | 637,2128             | -1,6 | -1   | C <sub>30</sub> H <sub>38</sub> O <sub>15</sub> |
| Cirsilineol_2                                                                              | 344,0896  | 343,0824             | 0,2  | 0,1  | C <sub>18</sub> H <sub>16</sub> O <sub>7</sub>  |
| 5-Feruloylquinic acid                                                                      | 368,11073 | 367,1035             | 0,1  | 0    | C <sub>17</sub> H <sub>20</sub> O <sub>9</sub>  |
| kaempferol 3-O-rutinoside                                                                  | 594,15847 | 593,1512             | 0,1  | 0    | C <sub>27</sub> H <sub>30</sub> O <sub>15</sub> |
| Pectolinarigenin                                                                           | 314,07904 | 313,07 <sub>16</sub> | -0,6 | -0,2 | C <sub>17</sub> H <sub>14</sub> O <sub>6</sub>  |
| Pinoresinol-4-O-Beta-Monoglycoside                                                         | 520,19446 | 519,1862             | -1,9 | -1   | C <sub>26</sub> H <sub>32</sub> O <sub>11</sub> |
| Isoscutellarein 7-O-[6'-O-acetyl-β-D-allopyranosyl-(1→2)]-6"-O-acetyl-β-D-glucopyranoside" | 694,17451 | 693,167              | -0,3 | -0,2 | C <sub>31</sub> H <sub>34</sub> O <sub>18</sub> |
| Geniposidic-Acid                                                                           | 374,1213  | 373,1138             | -0,5 | -0,2 | C <sub>16</sub> H <sub>22</sub> O <sub>10</sub> |
| Genistein 4',7-O-diglucuronide                                                             | 622,117   | 621,1091             | -1,1 | -0,7 | C <sub>27</sub> H <sub>26</sub> O <sub>17</sub> |
| Luteolin 7-O-diglucuronide_2                                                               | 638,11191 | 637,103              | -2,5 | -1,6 | C <sub>27</sub> H <sub>26</sub> O <sub>18</sub> |
| Hesperidin                                                                                 | 610,18977 | 609,1826             | 0,2  | 0,1  | C <sub>28</sub> H <sub>34</sub> O <sub>15</sub> |
| Nicotiflorin                                                                               | 594,15847 | 593,1495             | -2,9 | -1,7 | C <sub>27</sub> H <sub>30</sub> O <sub>15</sub> |
| Rhamnetin 3-glucoside                                                                      | 478,11113 | 477,1037             | -0,4 | -0,2 | C <sub>22</sub> H <sub>22</sub> O <sub>12</sub> |

|                                                                |           |          |      |      |                                                 |
|----------------------------------------------------------------|-----------|----------|------|------|-------------------------------------------------|
| Luteolin 4'-glucoside                                          | 448,10056 | 447,0931 | -0,3 | -0,2 | C <sub>21</sub> H <sub>20</sub> O <sub>11</sub> |
| 3,4-Dicaffeoylquinic Acid                                      | 516,12678 | 515,1195 | 0    | 0    | C <sub>25</sub> H <sub>24</sub> O <sub>12</sub> |
| 4-Hydroxy-5-(3',5'-dihydroxyphenyl)-valeric acid-O-glucuronide | 402,11621 | 401,108  | -2,4 | -1   | C <sub>17</sub> H <sub>22</sub> O <sub>11</sub> |
| Lithospermic acid B                                            | 718,15338 | 717,1463 | 0,2  | 0,2  | C <sub>36</sub> H <sub>30</sub> O <sub>16</sub> |
| Falcarindiol 3-acetate                                         | 302,18819 | 301,1805 | -1,4 | -0,4 | C <sub>19</sub> H <sub>26</sub> O <sub>3</sub>  |
| Antoside                                                       | 610,15338 | 609,1452 | -1,5 | -0,9 | C <sub>27</sub> H <sub>30</sub> O <sub>16</sub> |
| Luteolin 7-O-diglucuronide_1                                   | 638,11191 | 637,102  | -4,2 | -2,7 | C <sub>27</sub> H <sub>26</sub> O <sub>18</sub> |
| Apigenin 7-O-apiosyl-glucoside                                 | 564,14791 | 563,1404 | -0,5 | -0,3 | C <sub>26</sub> H <sub>28</sub> O <sub>14</sub> |
| Kaempferol 3-O-acetyl-glucoside                                | 490,11113 | 489,1029 | -2   | -1   | C <sub>23</sub> H <sub>22</sub> O <sub>12</sub> |
| Citric acid                                                    | 192,027   | 191,0194 | -1,9 | -0,4 | C <sub>6</sub> H <sub>8</sub> O <sub>7</sub>    |

**Table S15.** Identified compounds in sideritis aqueous extract (ESI positive mode).

| Component name                                                         | Neutral mass (Da) | Observed m/z | Mass error (ppm) | Mass error (mDa) | Formula                                         |
|------------------------------------------------------------------------|-------------------|--------------|------------------|------------------|-------------------------------------------------|
| Isoscutellarein 4'-methyl ether 7-(6'''-acetylallosyl)(1->2)-glucoside | 666,1796          | 667,1872     | 0,5              | 0,3              | C <sub>30</sub> H <sub>34</sub> O <sub>17</sub> |
| 9-F1-phytoprostane                                                     | 328,22497         | 351,2132     | -3               | -1               | C <sub>18</sub> H <sub>32</sub> O <sub>5</sub>  |

|                                                                                 |           |          |      |      |                                                 |
|---------------------------------------------------------------------------------|-----------|----------|------|------|-------------------------------------------------|
| Isoscutellarein 7-O-[6'''-O-acetyl-β-d-allopyranosyl-(1→2)]-β-d-glucopyranoside | 652,16395 | 653,1717 | 0,8  | 0,5  | C <sub>29</sub> H <sub>32</sub> O <sub>17</sub> |
| Acteoside                                                                       | 624,20542 | 647,1952 | 0,9  | 0,6  | C <sub>29</sub> H <sub>36</sub> O <sub>15</sub> |
| Apigenin-7-O-glucoside                                                          | 432,10565 | 433,113  | 0,2  | 0,1  | C <sub>21</sub> H <sub>20</sub> O <sub>10</sub> |
| Cirsilineol_1                                                                   | 344,0896  | 345,0963 | -1,7 | -0,6 | C <sub>18</sub> H <sub>16</sub> O <sub>7</sub>  |
| Teupolioside                                                                    | 786,25824 | 809,2472 | -0,3 | -0,3 | C <sub>35</sub> H <sub>46</sub> O <sub>20</sub> |
| Isoacteoside                                                                    | 624,20542 | 647,1975 | 4,3  | 2,8  | C <sub>29</sub> H <sub>36</sub> O <sub>15</sub> |
| Cirsilineol_2                                                                   | 344,0896  | 345,0962 | -2   | -0,7 | C <sub>18</sub> H <sub>16</sub> O <sub>7</sub>  |
| Leucosceptoside A                                                               | 638,22107 | 661,2105 | 0,3  | 0,2  | C <sub>30</sub> H <sub>38</sub> O <sub>15</sub> |
| 5-Feruloylquinic acid                                                           | 368,11073 | 391,0997 | -0,8 | -0,3 | C <sub>17</sub> H <sub>20</sub> O <sub>9</sub>  |
| Bergenin                                                                        | 328,07943 | 351,0681 | -1,4 | -0,5 | C <sub>14</sub> H <sub>16</sub> O <sub>9</sub>  |
| Apigenin 7-(2'',3''-diacetyl-hexocide)                                          | 516,12678 | 517,1342 | 0,2  | 0,1  | C <sub>25</sub> H <sub>24</sub> O <sub>12</sub> |
| 1,3-Dicaffeoylquinic acid                                                       | 516,12678 | 517,135  | 1,8  | 1    | C <sub>25</sub> H <sub>24</sub> O <sub>12</sub> |
| Oleuropein                                                                      | 540,18429 | 563,1726 | -1,7 | -1   | C <sub>25</sub> H <sub>32</sub> O <sub>13</sub> |
| alpha-Methyl-D-mannopyranoside                                                  | 194,07904 | 217,0684 | 0,5  | 0,1  | C <sub>7</sub> H <sub>14</sub> O <sub>6</sub>   |
| Luteolin 7-O-diglucuronide_1                                                    | 638,11191 | 639,1185 | -1,1 | -0,7 | C <sub>27</sub> H <sub>26</sub> O <sub>18</sub> |



**Table S16.** Identified compounds in spearmint aqueous extract (ESI negative mode).

| Component name                            | Neutral mass (Da)      | Observed m/z          | Mass error (ppm) | Mass error (mDa) | Formula                                         |
|-------------------------------------------|------------------------|-----------------------|------------------|------------------|-------------------------------------------------|
| Nicotiflorin                              | 594,15847              | 593,151               | -0,3             | -0,2             | C <sub>27</sub> H <sub>30</sub> O <sub>15</sub> |
| Scutellarin                               | 462,07983              | 461,073               | 1                | 0,5              | C <sub>21</sub> H <sub>18</sub> O <sub>12</sub> |
| Rosmarinic acid                           | 360,08452              | 359,0778              | 1,6              | 0,6              | C <sub>18</sub> H <sub>16</sub> O <sub>8</sub>  |
| Diosmin                                   | 608,17412              | 607, <sub>16</sub> 77 | 1,4              | 0,8              | C <sub>28</sub> H <sub>32</sub> O <sub>15</sub> |
| Luteolin-3-O-glucuronide                  | 462,07983              | 461,0741              | 3,3              | 1,5              | C <sub>21</sub> H <sub>18</sub> O <sub>12</sub> |
| Luteolin                                  | 286,04774              | 285,0407              | 0,9              | 0,3              | C <sub>15</sub> H <sub>10</sub> O <sub>6</sub>  |
| Hesperidin                                | 610,18977              | 609,183               | 0,8              | 0,5              | C <sub>28</sub> H <sub>34</sub> O <sub>15</sub> |
| Vanillylmandelic acid                     | 198,05282              | 197,0456              | 0,5              | 0,1              | C <sub>9</sub> H <sub>10</sub> O <sub>5</sub>   |
| Caffeoyl tartaric acid                    | 312,04813              | 311,0413              | 1,4              | 0,4              | C <sub>13</sub> H <sub>12</sub> O <sub>9</sub>  |
| Isorhamnetin 3-O-glucoside 7-O-rhamnoside | 624, <sub>16</sub> 903 | 623, <sub>16</sub> 05 | -2               | -1,3             | C <sub>28</sub> H <sub>32</sub> O <sub>16</sub> |
| Salvianolic acid B_1                      | 718,15338              | 717,1461              | 0                | 0                | C <sub>36</sub> H <sub>30</sub> O <sub>16</sub> |
| Salvianolic Acid A                        | 494,1213               | 493,1148              | 1,7              | 0,8              | C <sub>26</sub> H <sub>22</sub> O <sub>10</sub> |
| Apigenin-7-O-glucuronide                  | 446,08491              | 445,0786              | 2,2              | 1                | C <sub>21</sub> H <sub>18</sub> O <sub>11</sub> |
| Lithospermic acid B                       | 718,15338              | 717,1456              | -0,8             | -0,5             | C <sub>36</sub> H <sub>30</sub> O <sub>16</sub> |
| Rutin                                     | 610,15338              | 609,1463              | 0,4              | 0,2              | C <sub>27</sub> H <sub>30</sub> O <sub>16</sub> |

|                                   |                        |          |      |      |                                                 |
|-----------------------------------|------------------------|----------|------|------|-------------------------------------------------|
| Luteolin 7-O-diglucuronide_1      | 638,11191              | 637,1051 | 0,7  | 0,4  | C <sub>27</sub> H <sub>26</sub> O <sub>18</sub> |
| Luteolin 7-O-glucoside            | 448,10056              | 447,0934 | 0,3  | 0,2  | C <sub>21</sub> H <sub>20</sub> O <sub>11</sub> |
| Eupatilin                         | 344,0896               | 343,0826 | 0,7  | 0,2  | C <sub>18</sub> H <sub>16</sub> O <sub>7</sub>  |
| Chicoric acid                     | 474,07983              | 473,0729 | 0,7  | 0,3  | C <sub>22</sub> H <sub>18</sub> O <sub>12</sub> |
| Genkwanin                         | 284,06847              | 283,0615 | 1    | 0,3  | C <sub>16</sub> H <sub>12</sub> O <sub>5</sub>  |
| kaempferol 3-O-rutinoside         | 594,15847              | 593,1504 | -1,3 | -0,8 | C <sub>27</sub> H <sub>30</sub> O <sub>15</sub> |
| Isorhamnetin 3-O-glucoside        | 478,11113              | 477,1034 | -0,9 | -0,5 | C <sub>22</sub> H <sub>22</sub> O <sub>12</sub> |
| Chrysoeriol 7-O-apiosyl-glucoside | 594,15847              | 593,1507 | -0,8 | -0,5 | C <sub>27</sub> H <sub>30</sub> O <sub>15</sub> |
| Cynarin                           | 5 <sub>16</sub> ,12678 | 515,1186 | -1,7 | -0,9 | C <sub>25</sub> H <sub>24</sub> O <sub>12</sub> |
| Ferulic acid-4'-O-glucoside       | 356,11073              | 355,1034 | -0,3 | -0,1 | C <sub>16</sub> H <sub>20</sub> O <sub>9</sub>  |
| 1,3-Dicaffeoylquinic acid         | 5 <sub>16</sub> ,12678 | 515,1191 | -0,8 | -0,4 | C <sub>25</sub> H <sub>24</sub> O <sub>12</sub> |
| 3,4-Dicaffeoylquinic Acid         | 5 <sub>16</sub> ,12678 | 515,1179 | -3,1 | -1,6 | C <sub>25</sub> H <sub>24</sub> O <sub>12</sub> |
| Antoside                          | 610,15338              | 609,1452 | -1,5 | -0,9 | C <sub>27</sub> H <sub>30</sub> O <sub>16</sub> |
| Apigenin 7-O-diglucuronide        | 622,117                | 621,1112 | 2,4  | 1,5  | C <sub>27</sub> H <sub>26</sub> O <sub>17</sub> |
| Naringenin-4',5-diglucuronide     | 608,13773              | 607,1275 | -4,9 | -3   | C <sub>27</sub> H <sub>28</sub> O <sub>16</sub> |

|                                                          |           |          |      |      |                                                 |
|----------------------------------------------------------|-----------|----------|------|------|-------------------------------------------------|
| Kaempferol 3-rhamnosyl-(1->2)-rhamnosyl-(1->6)-glucoside | 740,21638 | 739,2078 | -1,7 | -1,3 | C <sub>33</sub> H <sub>40</sub> O <sub>19</sub> |
| Oleuropein                                               | 540,18429 | 539,1763 | -1,3 | -0,7 | C <sub>25</sub> H <sub>32</sub> O <sub>13</sub> |
| Allobetonicoside                                         | 506,16356 | 505,1561 | -0,4 | -0,2 | C <sub>21</sub> H <sub>30</sub> O <sub>14</sub> |
| Acteoside                                                | 624,20542 | 623,2007 | 4,1  | 2,5  | C <sub>29</sub> H <sub>36</sub> O <sub>15</sub> |
| 6''-O-Malonyldaidzin                                     | 502,11113 | 501,1034 | -0,8 | -0,4 | C <sub>24</sub> H <sub>22</sub> O <sub>12</sub> |
| Salvianolic acid G                                       | 418,09    | 417,082  | -1,7 | -0,7 | C <sub>20</sub> H <sub>18</sub> O <sub>10</sub> |
| Quercetin 3-arabinoside                                  | 434,08491 | 433,0779 | 0,6  | 0,3  | C <sub>20</sub> H <sub>18</sub> O <sub>11</sub> |
| Melittoside                                              | 524,17412 | 523,1679 | 2    | 1,1  | C <sub>21</sub> H <sub>32</sub> O <sub>15</sub> |

**Table S17.** Identified compounds in spearmint aqueous extract (ESI positive mode).

| Component name           | Neutral mass (Da) | Observed m/z | Mass error (ppm) | Mass error (mDa) | Formula                                         |
|--------------------------|-------------------|--------------|------------------|------------------|-------------------------------------------------|
| Scutellarin              | 462,07983         | 463,0871     | 0                | 0                | C <sub>21</sub> H <sub>18</sub> O <sub>12</sub> |
| Diosmin                  | 608,17412         | 609,1817     | 0,5              | 0,3              | C <sub>28</sub> H <sub>32</sub> O <sub>15</sub> |
| Luteolin-3-O-glucuronide | 462,07983         | 463,0881     | 2,1              | 1                | C <sub>21</sub> H <sub>18</sub> O <sub>12</sub> |
| Luteolin 7-O-rutinoside  | 594,15847         | 595,166      | 0,5              | 0,3              | C <sub>27</sub> H <sub>30</sub> O <sub>15</sub> |
| 9-F1-phytoprostane       | 328,22497         | 351,2137     | -1,3             | -0,4             | C <sub>18</sub> H <sub>32</sub> O <sub>5</sub>  |
| Luteolin                 | 286,04774         | 287,0548     | -0,6             | -0,2             | C <sub>15</sub> H <sub>10</sub> O <sub>6</sub>  |

|                                                 |                        |                       |      |      |                                                 |
|-------------------------------------------------|------------------------|-----------------------|------|------|-------------------------------------------------|
| Luteolin 7-O-glucoside                          | 448,10056              | 449,1079              | 0    | 0    | C <sub>21</sub> H <sub>20</sub> O <sub>11</sub> |
| Hesperidin                                      | 610,18977              | 633,1791              | 0,1  | 0,1  | C <sub>28</sub> H <sub>34</sub> O <sub>15</sub> |
| Sucrose                                         | 342,1 <sub>6</sub> 21  | 365,1052              | -0,7 | -0,3 | C <sub>12</sub> H <sub>22</sub> O <sub>11</sub> |
| Luteolin 7-O-diglucuronide_1                    | 638,11191              | 639,1197              | 0,8  | 0,5  | C <sub>27</sub> H <sub>26</sub> O <sub>18</sub> |
| Hexose                                          | 180,06339              | 203,0525              | -0,7 | -0,1 | C <sub>6</sub> H <sub>12</sub> O <sub>6</sub>   |
| Salvianolic acid B_1                            | 718,15338              | 741,1424              | -0,3 | -0,2 | C <sub>36</sub> H <sub>30</sub> O <sub>16</sub> |
| Rutin                                           | 610,15338              | 611,1 <sub>6</sub> 12 | 0,9  | 0,6  | C <sub>27</sub> H <sub>30</sub> O <sub>16</sub> |
| 3,4-Dicaffeoylquinic Acid                       | 5 <sub>16</sub> ,12678 | 539,118               | 3,7  | 2    | C <sub>25</sub> H <sub>24</sub> O <sub>12</sub> |
| Acteoside                                       | 624,20542              | 647,1942              | -0,7 | -0,4 | C <sub>29</sub> H <sub>36</sub> O <sub>15</sub> |
| Chrysoeriol 7-O-apiosyl-glucoside               | 594,15847              | 595,1 <sub>6</sub> 63 | 0,9  | 0,5  | C <sub>27</sub> H <sub>30</sub> O <sub>15</sub> |
| Rhoifolin                                       | 578,1 <sub>6</sub> 356 | 578,1 <sub>6</sub> 41 | 1,8  | 1,1  | C <sub>27</sub> H <sub>30</sub> O <sub>14</sub> |
| Manghaslin (Quercetin 3-2G-rhamnosylrutinoside) | 756,21129              | 757,2183              | -0,3 | -0,2 | C <sub>33</sub> H <sub>40</sub> O <sub>20</sub> |
| Naringenin-4',5-diglucuronide                   | 608,13773              | 609,145               | 0    | 0    | C <sub>27</sub> H <sub>28</sub> O <sub>16</sub> |
| 5-O-Caffeoylshikimic acid                       | 336,08452              | 359,0747              | 2,8  | 1    | C <sub>16</sub> H <sub>16</sub> O <sub>8</sub>  |
| kaempferol 3-O-rutinoside                       | 594,15847              | 617,1468              | -1,5 | -0,9 | C <sub>27</sub> H <sub>30</sub> O <sub>15</sub> |
| Lithospermic acid_1                             | 538,11113              | 561,0992              | -2,1 | -1,2 | C <sub>27</sub> H <sub>22</sub> O <sub>12</sub> |
| Quercetin 3-rutinoside-7-glucoside              | 772,20621              | 795,1929              | -3,1 | -2,5 | C <sub>33</sub> H <sub>40</sub> O <sub>21</sub> |
| Vanillylmandelic acid                           | 198,05282              | 221,0411              | -4,4 | -1   | C <sub>9</sub> H <sub>10</sub> O <sub>5</sub>   |

**Table S18.** Identified compounds in St. John's wort aqueous extract (ESI negative mode).

| Component name               | Neutral mass (Da) | Observed m/z | Mass error (ppm) | Mass error (mDa) | Formula                                         |
|------------------------------|-------------------|--------------|------------------|------------------|-------------------------------------------------|
| Quercetin-3-O-glucoside      | 464,09548         | 463,0886     | 0,8              | 0,4              | C <sub>21</sub> H <sub>20</sub> O <sub>12</sub> |
| Quercetin                    | 302,04265         | 301,0354     | -0,1             | 0                | C <sub>15</sub> H <sub>10</sub> O <sub>7</sub>  |
| Luteolin 4'-glucoside        | 448,10056         | 447,0932     | -0,3             | -0,1             | C <sub>21</sub> H <sub>20</sub> O <sub>11</sub> |
| Cinnamtannin A2_1            | 1154,2692         | 1153,2608    | -0,9             | -1,1             | C <sub>60</sub> H <sub>50</sub> O <sub>24</sub> |
| 9-F1-phytoprostane           | 328,22497         | 327,2176     | -0,2             | -0,1             | C <sub>18</sub> H <sub>32</sub> O <sub>5</sub>  |
| Astragalin                   | 448,10056         | 447,0932     | -0,1             | 0                | C <sub>21</sub> H <sub>20</sub> O <sub>11</sub> |
| Quercetin 3,4'-O-diglucoside | 626,1483          | 625,1412     | 0,2              | 0,1              | C <sub>27</sub> H <sub>30</sub> O <sub>17</sub> |
| Anhydrochiisanogenoic acid   | 502,32944         | 501,3219     | -0,6             | -0,3             | C <sub>30</sub> H <sub>46</sub> O <sub>6</sub>  |
| Amentoflavone                | 538,09            | 537,0825     | -0,4             | -0,2             | C <sub>30</sub> H <sub>18</sub> O <sub>10</sub> |
| Cinnamtannin A2_2            | 1154,2692         | 1153,2605    | -1,2             | -1,4             | C <sub>60</sub> H <sub>50</sub> O <sub>24</sub> |
| Kaempferol                   | 286,04774         | 285,0405     | 0                | 0                | C <sub>15</sub> H <sub>10</sub> O <sub>6</sub>  |
| Rutin                        | 610,15338         | 609,1464     | 0,5              | 0,3              | C <sub>27</sub> H <sub>30</sub> O <sub>16</sub> |
| Oleuropein                   | 540,18429         | 539,1769     | -0,3             | -0,2             | C <sub>25</sub> H <sub>32</sub> O <sub>13</sub> |
| Kaempferol 3-O-sophoroside   | 610,15338         | 609,1442     | -3,1             | -1,9             | C <sub>27</sub> H <sub>30</sub> O <sub>16</sub> |
| Apigenin-7-O-glucuronide     | 446,08491         | 445,0771     | -1,2             | -0,5             | C <sub>21</sub> H <sub>18</sub> O <sub>11</sub> |
| 5-O-Caffeoylshikimic acid    | 336,08452         | 335,0774     | 0,4              | 0,1              | C <sub>16</sub> H <sub>16</sub> O <sub>8</sub>  |

|                                      |           |          |      |      |                                                 |
|--------------------------------------|-----------|----------|------|------|-------------------------------------------------|
| Myricetin 7-glucoside                | 480,09039 | 479,0811 | -4,1 | -2   | C <sub>21</sub> H <sub>20</sub> O <sub>13</sub> |
| Chicoric acid                        | 474,07983 | 473,0723 | -0,5 | -0,2 | C <sub>22</sub> H <sub>18</sub> O <sub>12</sub> |
| Quercetin 3'-O-glucuronide           | 478,07474 | 477,066  | -3,1 | -1,5 | C <sub>21</sub> H <sub>18</sub> O <sub>13</sub> |
| Dihydroferulic acid-4'-O-glucuronide | 372,10565 | 371,0983 | -0,3 | -0,1 | C <sub>16</sub> H <sub>20</sub> O <sub>10</sub> |
| Allobetonicoside                     | 506,16356 | 505,1552 | -2,2 | -1,1 | C <sub>21</sub> H <sub>30</sub> O <sub>14</sub> |
| Apigenin-7-O-glucoside               | 432,10565 | 431,0972 | -2,7 | -1,2 | C <sub>21</sub> H <sub>20</sub> O <sub>10</sub> |
| Dihydroferulic acid 4-O-glucuronide  | 372,10565 | 371,0978 | -1,6 | -0,6 | C <sub>16</sub> H <sub>20</sub> O <sub>10</sub> |
| Coumaroylquinic acid                 | 338,10017 | 337,0937 | 2,3  | 0,8  | C <sub>16</sub> H <sub>18</sub> O <sub>8</sub>  |
| Salvianolic acid G                   | 418,09    | 417,0821 | -1,4 | -0,6 | C <sub>20</sub> H <sub>18</sub> O <sub>10</sub> |

**Table S19.** Identified compounds in St. John's wort aqueous extract (ESI positive mode).

| Component name                              | Neutral mass (Da) | Observed m/z | Mass error (ppm) | Mass error (mDa) | Formula                                         |
|---------------------------------------------|-------------------|--------------|------------------|------------------|-------------------------------------------------|
| Quercetin 3-glucuronate                     | 478,07474         | 479,0816     | -0,9             | -0,4             | C <sub>21</sub> H <sub>18</sub> O <sub>13</sub> |
| Quercetin                                   | 302,04265         | 303,0496     | -1,2             | -0,3             | C <sub>15</sub> H <sub>10</sub> O <sub>7</sub>  |
| Hyperoside                                  | 464,09548         | 465,1023     | -0,9             | -0,4             | C <sub>21</sub> H <sub>20</sub> O <sub>12</sub> |
| Myricetin-3-O- $\alpha$ -L-rhamnopyranoside | 464,09548         | 487,0842     | -0,9             | -0,5             | C <sub>21</sub> H <sub>20</sub> O <sub>12</sub> |
| Naringenin 5-O-glucuronide                  | 448,10056         | 471,0893     | -1               | -0,5             | C <sub>21</sub> H <sub>20</sub> O <sub>11</sub> |
| Amentoflavone                               | 538,09            | 539,0969     | -0,7             | -0,4             | C <sub>30</sub> H <sub>18</sub> O <sub>10</sub> |

|                                    |           |           |      |      |                                                 |
|------------------------------------|-----------|-----------|------|------|-------------------------------------------------|
| Luteolin 4'-glucoside              | 448,10056 | 471,0896  | -0,3 | -0,1 | C <sub>21</sub> H <sub>20</sub> O <sub>11</sub> |
| 9-F1-phytoprostane                 | 328,22497 | 351,2133  | -2,5 | -0,9 | C <sub>18</sub> H <sub>32</sub> O <sub>5</sub>  |
| Cinnamtannin A2_1                  | 1154,2692 | 1155,2767 | 0,2  | 0,2  | C <sub>60</sub> H <sub>50</sub> O <sub>24</sub> |
| Quercetin 3-arabinoside            | 434,08491 | 457,0737  | -0,9 | -0,4 | C <sub>20</sub> H <sub>18</sub> O <sub>11</sub> |
| Kaempferol-3-o-glucuronide         | 462,07983 | 463,0868  | -0,5 | -0,3 | C <sub>21</sub> H <sub>18</sub> O <sub>12</sub> |
| Hexose                             | 180,06339 | 203,0524  | -0,9 | -0,2 | C <sub>6</sub> H <sub>12</sub> O <sub>6</sub>   |
| Chrysoeriol 7-O-apiosyl-glucoside  | 594,15847 | 595,1654  | -0,5 | -0,3 | C <sub>27</sub> H <sub>30</sub> O <sub>15</sub> |
| Cinnamtannin A2_2                  | 1154,2692 | 1155,2773 | 0,7  | 0,8  | C <sub>60</sub> H <sub>50</sub> O <sub>24</sub> |
| Rutin                              | 610,15338 | 633,1423  | -0,5 | -0,3 | C <sub>27</sub> H <sub>30</sub> O <sub>16</sub> |
| Quercetin 3,4'-O-diglucoside       | 626,1483  | 627,1567  | 1,9  | 1,2  | C <sub>27</sub> H <sub>30</sub> O <sub>17</sub> |
| Myricetin-3-O-galactopyranoside    | 480,09039 | 503,0797  | 0,2  | 0,1  | C <sub>21</sub> H <sub>20</sub> O <sub>13</sub> |
| Oleuropein                         | 540,18429 | 541,1919  | 0,5  | 0,3  | C <sub>25</sub> H <sub>32</sub> O <sub>13</sub> |
| Pinoresinol-4-O-Beta-Monoglycoside | 520,19446 | 543,1845  | 1,5  | 0,8  | C <sub>26</sub> H <sub>32</sub> O <sub>11</sub> |
| Caffeic acid                       | 180,04226 | 181,0498  | 1,4  | 0,2  | C <sub>9</sub> H <sub>8</sub> O <sub>4</sub>    |
| Betonicine                         | 159,08954 | 160,0962  | -4,2 | -0,7 | C <sub>7</sub> H <sub>13</sub> NO <sub>3</sub>  |
| Luteolin-3-O-glucuronide           | 462,07983 | 485,0713  | 4,7  | 2,3  | C <sub>21</sub> H <sub>18</sub> O <sub>12</sub> |
| Phloridzin                         | 436,13695 | 459,125   | -2,5 | -1,1 | C <sub>21</sub> H <sub>24</sub> O <sub>10</sub> |

**Table S20.** Total phytochemical profile of the 9 studied plants.

| Total Phytochemical Profile |                                                                                                               |                           |                         |                           |                                                          |                                                          |                    |                         |                            |
|-----------------------------|---------------------------------------------------------------------------------------------------------------|---------------------------|-------------------------|---------------------------|----------------------------------------------------------|----------------------------------------------------------|--------------------|-------------------------|----------------------------|
| Sr. No.                     | Bitter Orange                                                                                                 | Dittany                   | Lemon Peel              | Spearmint                 | Lavender                                                 | Lemon Balm                                               | Sideritis          | St. John's wort         | Rosehip                    |
| 1                           | 1,2-Disinapoylgentiobiose                                                                                     | 3,4-Dicaffeoylquinic Acid | 9-F1-phytoprostane      | Oleuropein                | Rosmarinic acid                                          | Rosmarinic acid                                          | 9-F1-phytoprostane | Oleuropein              | Ascorbic acid (L-)         |
| 2                           | Isoscutellarein 7-O-[6'''-O-acetyl- $\beta$ -D-allopyranosyl-(1 $\rightarrow$ 2)]- $\beta$ -D-glucopyranoside | Rosmarinic acid           | Quercetin-3-O-glucoside | Luteolin                  | Luteolin-3-O-glucuronide                                 | Lithospermic acid B                                      | Geniposidic-Acid   | Quercetin-3-O-glucoside | Apigenin 7-O-diglucuronide |
| 3                           | Rhoifolin                                                                                                     | Salvianolic acid C        | Allobetonicoside        | Allobetonoside            | Vanillylmandelic acid                                    | Vanillylmandelic acid                                    | Cirsilineol_1      | Allobetonicoside        | Melittoside                |
| 4                           | Eriocitrin_1                                                                                                  | Lithospermic acid B       | D-(+)-Mannose           | 1,3-Dicaffeoylquinic acid | D-(+)-Mannose                                            | Quercitrin (Quercetin-3-O- $\alpha$ -L-rhamnopyranoside) | Bergenin           | Astragalin              | Valoneic acid dilactone    |
| 5                           | Orientin                                                                                                      | Vanillylmandelic acid     | Geniposidic-Acid        | Luteolin 7-O-glucoside    | Quercitrin (Quercetin-3-O- $\alpha$ -L-rhamnopyranoside) | Diosmetin                                                | Teupolioside       | Rutin                   | 5-O-Galloylquinic acid     |



|    |                                |                             |                              |                            |                              |                                                                  |                              |                          |                                   |
|----|--------------------------------|-----------------------------|------------------------------|----------------------------|------------------------------|------------------------------------------------------------------|------------------------------|--------------------------|-----------------------------------|
| 6  | Salvianolic acid G             | Ferulic acid-4'-O-glucoside | Barbatoside A/B              | Vanillylmandelic acid      | Apigenin                     | Salvianolic acid B_1                                             | Leucosceptoside A            | Amentoflavone            | Astilbin                          |
| 7  | Kaempferol 3-O-acetylglucoside | Diosmin                     | Luteolin 7-O-glucoside       | Rutin                      | Ferulic acid-4'-O-glucoside  | Nicotiflorin                                                     | Lithospermic acid B          | Apigenin-7-O-glucuronide | Taxifolin                         |
| 8  | D-(+)-Mannose                  | Salvianolic acid B_1        | Rutin                        | Rosmarinic acid            | Salvianolic acid B_2         | Quercetin 3-O-beta-D-glucopyranosyl-7-O-alpha-L-rhamnopyranoside | 5-Feruloylquinic acid        | Kaempferol               | Sucrose                           |
| 9  | Nicotiflorin                   | Isoacteoside                | Limonin                      | Lithospermic acid B        | Luteolin 7-O-diglucuronide_2 | 1,3-Dicaffeoylquinic acid                                        | Apigenin                     | Cinnamtannin A2_1        | Protocatechuic acid 4-O-glucoside |
| 10 | Didymin                        | 6"-O-Malonylgenistin        | Rosmarinic acid              | Isorhamnetin 3-O-glucoside | Luteolin                     | Leucosceptoside A                                                | Kaempferol 3-O-sophoroside   | Quercetin                | Nicotiflorin                      |
| 11 | 5-Feruloylquinic acid          | Naringenin 7-O-glucoside    | Isorhamnetin 3-O-glucoside   | Apigenin-7-O-glucuronide   | Melittoside                  | Salvianolic Acid A                                               | Acteoside                    | Chicoric acid            | Diosmin                           |
| 12 | Rutin                          | Cirsilineol_1               | Azadirachtin                 | Apigenin 7-O-diglucuronide | Theaflavin 3-O-gallate_1     | Luteolin                                                         | Hesperidin                   | Apigenin-7-O-glucoside   | Quercetin 3-arabinoside           |
| 13 | 3,4-Dicaffeoylquinic Acid      | Glucogallin                 | Isorhamnetin 3-O-galactoside | Salvianolic Acid A         | Quercetin 3'-O-glucuronide   | Genkwanin                                                        | Luteolin 7-O-diglucuronide_1 | Luteolin 4'-glucoside    | Dihydroferulic acid 4-O-          |

|    |                                     |                                |                                 |                                      |                                                |                                     |                                                |                                   |                                                      |
|----|-------------------------------------|--------------------------------|---------------------------------|--------------------------------------|------------------------------------------------|-------------------------------------|------------------------------------------------|-----------------------------------|------------------------------------------------------|
|    |                                     |                                |                                 |                                      |                                                |                                     |                                                |                                   | glucuronid<br>e                                      |
| 14 | Azadirachtin                        | Cafestol (2-<br>hydroxy-)      | Chrysoeriol                     | Melittoside                          | Chicoric<br>acid                               | Theaflavin 3-<br>O-gallate_1        | Luteolin 7-<br>O-<br>diglucuroni<br>de_2       | 9-F1-<br>phytoprostane            | Dihydrofer<br>ulic acid-<br>4'-O-<br>glucuronid<br>e |
| 15 | Ferulic acid-<br>4'-O-<br>glucoside | Rutin                          | Hesperidin                      | Eupatilin                            | Scutellarin                                    | Chicoric acid                       | Citric acid                                    | Quercetin 3,4'-<br>O-diglucoside  | 9-F1-<br>phytoprost<br>ane                           |
| 16 | Eupatilin                           | Theaflavin 3-O-<br>gallate_1   | Hesperetin                      | Acteoside                            | Silybin                                        | Acteoside                           | Pectolinarig<br>enin                           | Anhydrochiisa<br>nogenoic acid    | Teupoliosi<br>de                                     |
| 17 | Kaempferol<br>3-O-<br>sophoroside   | Orientin                       | Citric acid                     | Genkwanin                            | Aucubin                                        | Caffeoyl<br>tartaric acid           | Rhamnetin<br>3-glucoside                       | Cinnamtannin<br>A2_2              | Hexose                                               |
| 18 | 9-F1-<br>phytoprostan<br>e          | Chicoric acid                  | Eriocitrin_1                    | Caffeoyl<br>tartaric acid            | Apigenin-7-<br>O-glucoside                     | 9-F1-<br>phytoprostan<br>e          | kaempferol<br>3-O-<br>rutinoside               | Kaempferol 3-<br>O-sophoroside    | alpha-<br>Methyl-D-<br>mannopyr<br>anoside           |
| 19 | Barbatoside<br>C/D                  | Kaempferol 3-O-<br>sophoroside | Astilbin                        | Chicoric acid                        | Oleuropein                                     | Salvianolic<br>acid B_2             | Apigenin-7-<br>O-glucoside                     | 5-O-<br>Caffeoylshiki<br>mic acid | Genistein<br>4',7-O-<br>diglucuron<br>ide            |
| 20 | Limonin                             | Scutellarin                    | Isorhamnetin-3-<br>O-rutinoside | Hesperidin                           | Pinoresinol-<br>4-O-Beta-<br>Monoglycos<br>ide | Caffeic acid<br>4-O-<br>glucoside   | Pinoresinol-<br>4-O-Beta-<br>Monoglycos<br>ide | Myricetin 7-<br>glucoside         | 6''-O-<br>Malonylge<br>nistin                        |
| 21 | Isorhamnetin<br>-3-O-<br>rutinoside | Eupatorin                      | Hispidulin<br>glucuronide       | Luteolin 7-O-<br>diglucuronid<br>e_1 | Caffeoyl<br>tartaric acid                      | Isorhamnetin<br>3-O-<br>galactoside | Nicotiflorin                                   | Quercetin 3'-<br>O-glucuronide    |                                                      |

|    |                                          |                              |                                    |                           |                                     |                                                        |                                                                                        |                                      |  |
|----|------------------------------------------|------------------------------|------------------------------------|---------------------------|-------------------------------------|--------------------------------------------------------|----------------------------------------------------------------------------------------|--------------------------------------|--|
| 22 | Quercetin 3-arabinoside                  | Homoplantaginin_Tectoridin   | Orientin                           | Cynarin                   | Lithospermic acid_1                 | Naringenin-4',5-diglucuronide                          | 3,4-Dicaffeoylquinic Acid                                                              | Dihydroferulic acid-4'-O-glucuronide |  |
| 23 | Bergenin                                 | Luteolin 7-O-diglucuronide_1 | kaempferol 3-O-rutinoside          | kaempferol 3-O-rutinoside | alpha-Methyl-D-mannopyranoside      | Kaempferol 3-O-(6''-acetyl-galactoside) 7-O-rhamnoside | Isoscutellarein 4'-methyl ether 7-(6'''-acetylallosyl)(1->2)-glucoside                 | Dihydroferulic acid 4-O-glucuronide  |  |
| 24 | Cirsilineol_1                            | Juglanin                     | Pinoresinol-4-O-Beta-Monoglycoside | Scutellarin               | 9-F1-phytoprostane                  | Dihydroferulic acid-4'-O-glucuronide                   | Isoscutellarein 7-O-[6'''-O-acetyl-beta-d-allopyranosyl-(1->2)]-beta-d-glucopyranoside | Coumaroylquinic acid                 |  |
| 25 | Eriocitrin_2                             | Isorhamnetin 3-O-glucoside   | Nicotiflorin                       | Salvianolic acid B_1      | Dihydroferulic acid 4-O-glucuronide | 6''-O-Malonyldaidzin                                   | Apigenin 7-(4''-E-p-coumarylglucoside)                                                 | Salvianolic acid G                   |  |
| 26 | Spinacetin 3-O-glucosyl-(1->6)-glucoside | Pectolinarigenin             | Diosmin                            | Nicotiflorin              | Naringenin-4',5-diglucuronide       | Luteolin 7-O-diglucuronide_1                           | Cirsilineol_2                                                                          | Myricetin-3-O-galactopyranoside      |  |

|    |                                                                      |                                    |                                                                                 |                                           |                                                                |                                                 |                                                                                             |                                    |  |
|----|----------------------------------------------------------------------|------------------------------------|---------------------------------------------------------------------------------|-------------------------------------------|----------------------------------------------------------------|-------------------------------------------------|---------------------------------------------------------------------------------------------|------------------------------------|--|
| 27 | Quercetin 3-O-(6''-acetyl-galactoside) 7-O-rhamnoside                | Cynarin                            | Isoscutellarein 7-O-[6'''-O-acetyl-β-d-allopyranosyl-(1→2)]-β-d-glucopyranoside | 3,4-Dicaffeoylquinic Acid                 | 4-Hydroxy-5-(3',5'-dihydroxyphenyl)-valeric acid-O-glucuronide | Echinacoside                                    | Isoscutellarein 7-O-[6'-O-acetyl-β-D-allopyranosyl-(1→2)]-6''-O-acetyl-β-D-glucopyranoside" | Kaempferol-3-o-glucuronide         |  |
| 28 | Isorhamnetin 3-O-galactoside                                         | Aucubin                            | 6''-O-Malonyldaidzin                                                            | Diosmin                                   | Isorhamnetin 3-O-galactoside                                   | Silydianin                                      | Genistein 4',7-O-diglucuronide                                                              | Hyperoside                         |  |
| 29 | 5,5'-Dicaffeic acid                                                  | Geniposidic-Acid                   | Isorhamnetin 3-O-glucoside 7-O-rhamnoside                                       | Luteolin-3-O-glucuronide                  | Hispidulin glucuronide                                         | Achillolide A                                   | Luteolin 4'-glucoside                                                                       | Phloridzin                         |  |
| 30 | Manghaslin (Quercetin 3-2G-rhamnosylrutinoside)                      | Pinoresinol-4-O-Beta-Monoglycoside | Salvianolic acid G                                                              | Isorhamnetin 3-O-glucoside 7-O-rhamnoside | Salvianolic acid C                                             | Sucrose                                         | 4-Hydroxy-5-(3',5'-dihydroxyphenyl)-valeric acid-O-glucuronide                              | Caffeic acid                       |  |
| 31 | Isoscutellarein 4'-methylether 7-(6'''-acetylallosyl)(1→2)-glucoside | Astilbin                           | Chrysoeriol 7-O-apiosyl-glucoside                                               | Chrysoeriol 7-O-apiosyl-glucoside         | 5-Feruloylquinic acid                                          | Manghaslin (Quercetin 3-2G-rhamnosylrutinoside) | Falcarindiol 3-acetate                                                                      | Myricetin-3-O-α-L-rhamnopyranoside |  |

|    |                         |                                                                |                                                                |                                                          |                              |                          |                                       |                                    |  |
|----|-------------------------|----------------------------------------------------------------|----------------------------------------------------------------|----------------------------------------------------------|------------------------------|--------------------------|---------------------------------------|------------------------------------|--|
| 32 | Quercetin-3-O-glucoside | Genistein 4',7-O-diglucuronide                                 | Ferulic acid-4'-O-glucoside                                    | Ferulic acid-4'-O-glucoside                              | Astragalin                   | Luteolin 7-O-glucoside   | Antoside                              | Betonicine                         |  |
| 33 | Allobetonicoside        | Lithospermic acid_1                                            | 4-Hydroxy-5-(3',5'-dihydroxyphenyl)-valeric acid-O-glucuronide | Antoside                                                 | 5-O-Caffeoylquinic acid      | Silybin                  | Apigenin 7-O-apiosyl-glucoside        | Pinoresinol-4-O-Beta-Monoglycoside |  |
| 34 | Feruloyl C1-glucuronide | 9-F1-phytoprostane                                             | Naringenin-4',5-diglucuronide                                  | Naringenin-4',5-diglucuronide                            | Luteolin 7-O-diglucuronide_1 | Glucobrassicinapin       | Kaempferol 3-O-acetyl-glucoside       | Quercetin 3-glucuronate            |  |
| 35 | Neodiosmin              | Chrysoeriol 7-O-apiosyl-glucoside                              | 6''-O-Malonylgenistin                                          | Kaempferol 3-rhamnosyl-(1->2)-rhamnosyl-(1->6)-glucoside | Cynarin                      | Luteolin-3-O-glucuronide | Oleuropein                            | Naringenin 5-O-glucuronide         |  |
| 36 | Glucogallin             | Isorhamnetin 3-O-galactoside                                   | Antoside                                                       | 6''-O-Malonyldaidzin                                     | Acteoside                    | Hexose                   | Isoacteoside                          | Quercetin 3-arabinoside            |  |
| 37 | Apigenin-7-O-glucoside  | 4-Hydroxy-5-(3',5'-dihydroxyphenyl)-valeric acid-O-glucuronide | Isorhamnetin 4'-O-glucuronide                                  | Salvianolic acid G                                       | Sucrose                      | Luteolin 4'-glucoside    | 1,3-Dicaffeoylquinic acid             | Hexose                             |  |
| 38 | 6''-O-Malonyldaidzin    | Naringenin-4',5-diglucuronide                                  | Kaempferol 3-O-(6''-acetyl-galactoside) 7-O-rhamnoside         | Quercetin 3-arabinoside                                  | Hexose                       | Lithospermic acid_1      | Apigenin 7-(2'',3''-diacetylhexoside) | Chrysoeriol 7-O-apiosyl-glucoside  |  |

|    |                                |                                                          |                                                                  |                                                 |                                                                        |                              |                                |                          |  |
|----|--------------------------------|----------------------------------------------------------|------------------------------------------------------------------|-------------------------------------------------|------------------------------------------------------------------------|------------------------------|--------------------------------|--------------------------|--|
| 39 | Caffeoyl tartaric acid         | Kaempferol 3-rhamnosyl-(1->2)-rhamnosyl-(1->6)-glucoside | Homoplantaginidin_Tectoridin                                     | Manghaslin (Quercetin 3-2G-rhamnosylrutinoside) | Luteolin 4'-glucoside                                                  | Hydroxytyrosol 4-O-glucoside | alpha-Methyl-D-mannopyranoside | Luteolin-3-O-glucuronide |  |
| 40 | Naringenin-4',5-diglucuronide  | Harpagide                                                | Apigenin 7-O-apiosyl-glucoside                                   | Rhoifolin                                       | Kaempferol 3-rhamnosyl-(1->2)-rhamnosyl-(1->6)-glucoside               |                              |                                |                          |  |
| 41 | Luteolin 4'-glucoside          | 5-Feruloylquinic acid                                    | Quercetin 3-O-(6-malonyl-glucoside)"                             | Luteolin 7-O-rutinoside                         | beta-D-Glcp-(1->4)-[L-alpha-D-Hepp-(1->3)]-L-alpha-D-Hepp              |                              |                                |                          |  |
| 42 | Apigenin 7-O-apiosyl-glucoside | Plumieride                                               | Quercetin 3-O-beta-D-glucopyranosyl-7-O-alpha-L-rhamnopyranoside | 9-F1-phytoprostane                              | Isoscutellarein 4'-methyl ether 7-(6'''-acetylallosyl)(1->2)-glucoside |                              |                                |                          |  |
| 43 | Patulitrin                     | Hexose                                                   | Nobiletin                                                        | Sucrose                                         |                                                                        |                              |                                |                          |  |
| 44 | Kaempferol 3-O-(6''-acetyl-    | Sucrose                                                  | 1,3-Dicaffeoylquinic acid                                        | Hexose                                          |                                                                        |                              |                                |                          |  |

|    |                                                       |                                                                       |                                                         |                                            |  |  |  |  |  |
|----|-------------------------------------------------------|-----------------------------------------------------------------------|---------------------------------------------------------|--------------------------------------------|--|--|--|--|--|
|    | galactoside)<br>7-O-<br>rhamnoside                    |                                                                       |                                                         |                                            |  |  |  |  |  |
| 45 | Luteolin 7-O-<br>diglucuronid<br>e_1                  | Silybin                                                               | 4-O-<br>Caffeoylquinic<br>acid                          | 5-O-<br>Caffeoylshiki<br>mic acid          |  |  |  |  |  |
| 46 | Glucoalyssin                                          | Acteoside                                                             | Byakangelicin                                           | Lithospermic<br>acid_1                     |  |  |  |  |  |
| 47 | Tragopogonic<br>acid                                  | Lithospermic acid                                                     | Myricetin-3-O- $\alpha$ -<br>L-<br>rhamnopyranosid<br>e | Quercetin 3-<br>rutinoside-7-<br>glucoside |  |  |  |  |  |
| 48 | Citric acid                                           | Apigenin 7-O-<br>diglucuronide                                        | Cirsimaritin                                            |                                            |  |  |  |  |  |
| 49 | Myricetin 3-<br>$\alpha$ -L-<br>arabinopyran<br>oside | Hispidulin<br>glucuronide                                             | Peonidin 3-O-<br>sophoroside                            |                                            |  |  |  |  |  |
| 50 | Echinacoside                                          | Hydroxytyrosol<br>4-O-glucoside                                       | Coumaroyl<br>tartaric acid (p-)                         |                                            |  |  |  |  |  |
| 51 | Cirsimaritin                                          | beta-D-Glcp-(1-<br>>4)-[L-alpha-D-<br>Hepp-(1->3)]-L-<br>alpha-D-Hepp | Spinacetin 3-O-<br>glucosyl-(1->6)-<br>glucoside        |                                            |  |  |  |  |  |
| 52 | Hexose                                                |                                                                       |                                                         |                                            |  |  |  |  |  |
| 53 | Leucosceptos<br>ide A                                 |                                                                       |                                                         |                                            |  |  |  |  |  |
| 54 | Luteolin 7-O-<br>rutinoside                           |                                                                       |                                                         |                                            |  |  |  |  |  |
| 55 | Sucrose                                               |                                                                       |                                                         |                                            |  |  |  |  |  |

|    |                                                                                      |  |  |  |  |  |  |  |  |
|----|--------------------------------------------------------------------------------------|--|--|--|--|--|--|--|--|
| 56 | 5,7-Dihydroxych<br>romone                                                            |  |  |  |  |  |  |  |  |
| 57 | Nobiletin                                                                            |  |  |  |  |  |  |  |  |
| 58 | Morroniside                                                                          |  |  |  |  |  |  |  |  |
| 59 | Quercetin 3-<br>rutinoside-7-<br>glucoside                                           |  |  |  |  |  |  |  |  |
| 60 | Peonidin 3-<br>O-<br>sophoroside                                                     |  |  |  |  |  |  |  |  |
| 61 | Betonicine                                                                           |  |  |  |  |  |  |  |  |
| 62 | Pelargonidin<br>3-O-<br>rutinoside                                                   |  |  |  |  |  |  |  |  |
| 63 | Chrysoeriol<br>7-O-apiosyl-<br>glucoside                                             |  |  |  |  |  |  |  |  |
| 64 | 6"-O-<br>Acetylgenisti<br>n                                                          |  |  |  |  |  |  |  |  |
| 65 | 5-(3'-<br>hydroxyphen<br>yl)-gamma-<br>hydroxyvaler<br>ic acid -4'-O-<br>glucuronide |  |  |  |  |  |  |  |  |



**Table S21.** Phytochemicals of bitter orange with antioxidant activity according to international literature.

| <b>Sr. No.</b> | <b>Component name</b>                           | <b>Formatted citation</b> |
|----------------|-------------------------------------------------|---------------------------|
| 1              | 1,2-Disinapoylgentiobiose                       | [1]                       |
| 2              | Rhoifolin                                       | [2]                       |
| 3              | Eriocitrin_1                                    | [3]                       |
| 4              | Orientin                                        | [4]                       |
| 5              | Kaempferol 3-O-acetyl-glucoside                 | [5]                       |
| 6              | D-(+)-Mannose                                   | [6]                       |
| 7              | Nicotiflorin                                    | [7]                       |
| 8              | Didymin                                         | [8]                       |
| 9              | 5-Feruloylquinic acid                           | [9]                       |
| 10             | Rutin                                           | [10]                      |
| 11             | 3,4-Dicaffeoylquinic Acid                       | [11]                      |
| 12             | Azadirachtin                                    | [12]                      |
| 13             | Ferulic acid-4'-O-glucoside                     | [13]                      |
| 14             | Eupatilin                                       | [14]                      |
| 15             | Kaempferol 3-O-sophoroside                      | [15]                      |
| 16             | Limonin                                         | [16]                      |
| 17             | Isorhamnetin-3-O-rutinoside                     | [17]                      |
| 18             | Bergenin                                        | [18]                      |
| 19             | Cirsilineol_1                                   | [19]                      |
| 20             | Eriocitrin_2                                    | [20]                      |
| 21             | Spinacetin 3-O-glucosyl-(1->6)-glucoside        | [21]                      |
| 22             | Isorhamnetin 3-O-galactoside                    | [22]                      |
| 23             | Manghaslin (Quercetin 3-2G-rhamnosylrutinoside) | [23]                      |

|    |                                            |      |
|----|--------------------------------------------|------|
| 24 | Quercetin-3-O-glucoside                    | [24] |
| 25 | Allobetonicoside                           | [25] |
| 26 | Feruloyl C1-glucuronide                    | [26] |
| 27 | Neodiosmin                                 | [27] |
| 28 | Glucogallin                                | [28] |
| 29 | Apigenin-7-O-glucoside                     | [29] |
| 30 | Patulitrin                                 | [30] |
| 31 | Luteolin 7-O-diglucuronide_1               | [31] |
| 32 | Glucoalyssin                               | [32] |
| 33 | Citric acid                                | [33] |
| 34 | Myricetin 3- $\alpha$ -L-arabinopyranoside | [34] |
| 35 | Nobiletin                                  | [36] |
| 36 | Sucrose                                    | [39] |
| 37 | Luteolin 7-O-rutinoside                    | [40] |
| 38 | Hexose                                     | [41] |
| 39 | Cirsimaritin                               | [46] |
| 40 | 5,7-Dihydroxychromone                      | [48] |
| 41 | Morroniside                                | [49] |
| 42 | Echinacoside                               | [50] |
| 43 | Leucosceptoside A                          | [51] |
| 44 | Quercetin 3-rutinoside-7-glucoside         | [53] |

**Table S22.** Phytochemicals of dittany with antioxidant activity according to international literature.

| <b>Sr. No.</b> | <b>Component Name</b>              | <b>Formatted Citation</b> |
|----------------|------------------------------------|---------------------------|
| 1              | Salvianolic acid B_1               | [54]                      |
| 2              | Luteolin 7-O-diglucuronide_1       | [55]                      |
| 3              | Rosmarinic acid                    | [56]                      |
| 4              | ferulic acid-4'-O-glucoside        | [57]                      |
| 5              | Cirsilineol_1                      | [58]                      |
| 6              | Scutellarin                        | [59]                      |
| 7              | Salvianolic acid C                 | [60]                      |
| 8              | Pectolinarigenin                   | [61]                      |
| 9              | Orientin                           | [38]                      |
| 10             | Eupatorin                          | [62]                      |
| 11             | Vanillylmandelic acid              | [63]                      |
| 12             | Cynarin                            | [64]                      |
| 13             | Rutin                              | [52]                      |
| 14             | Theaflavin 3-O-gallate_1           | [65]                      |
| 15             | Isorhamnetin 3-O-glucoside         | [66]                      |
| 16             | Juglanin                           | [67]                      |
| 17             | 3,4-Dicaffeoylquinic Acid          | [68]                      |
| 18             | Cafestol (2-hydroxy-)              | [69]                      |
| 19             | Astilbin                           | [71]                      |
| 20             | Kaempferol 3-O-sophoroside         | [44]                      |
| 21             | Pinoresinol-4-O-Beta-Monoglycoside | [72]                      |
| 22             | Glucogallin                        | [73]                      |

|    |                          |      |
|----|--------------------------|------|
| 23 | 6"-O-Malonylgenistin     | [74] |
| 24 | Geniposidic-Acid         | [75] |
| 25 | Isoacteoside             | [76] |
| 26 | Homoplantagin_Tectoridin | [77] |
| 27 | Naringenin 7-O-glucoside | [78] |
| 28 | Diosmin                  | [79] |
| 29 | Chicoric acid            | [80] |
| 30 | Aucubin                  | [81] |
| 31 | Sucrose                  | [39] |
| 32 | Hexose                   | [82] |
| 33 | Lithospermic acid B      | [57] |
| 34 | Acteoside                | [83] |
| 35 | Silybin                  | [84] |
| 36 | Plumieride               | [85] |
| 37 | 5-Feruloylquinic acid    | [86] |

**Table S23.** Phytochemicals of lemon peel with antioxidant activity according to international literature.

| Sr. No. | Component name | Formatted Citation |
|---------|----------------|--------------------|
| 1       | Eriocitrin_1   | [45]               |
| 2       | Nicotiflorin   | [69]               |
| 3       | Hesperidin     | [108]              |
| 4       | Rutin          | [52]               |

|    |                                                                  |       |
|----|------------------------------------------------------------------|-------|
| 5  | D-(+)-Mannose                                                    | [90]  |
| 6  | Diosmin                                                          | [79]  |
| 7  | Chrysoeriol                                                      | [42]  |
| 8  | Limonin                                                          | [38]  |
| 9  | Orientin                                                         | [38]  |
| 10 | Azadirachtin                                                     | [109] |
| 11 | Isorhamnetin-3-O-rutinoside                                      | [66]  |
| 12 | Hesperetin                                                       | [108] |
| 13 | Isorhamnetin 3-O-galactoside                                     | [110] |
| 14 | Astilbin                                                         | [111] |
| 15 | Barbatoside A/B                                                  | [112] |
| 16 | Allobetonicoside                                                 | [113] |
| 17 | kaempferol 3-O-rutinoside                                        | [114] |
| 18 | Quercetin-3-O-glucoside                                          | [115] |
| 19 | Isorhamnetin 3-O-glucoside                                       | [116] |
| 20 | Pinoresinol-4-O-Beta-Monoglycoside                               | [75]  |
| 21 | Citric acid                                                      | [117] |
| 22 | Hispidulin glucuronide                                           | [118] |
| 23 | Rosmarinic acid                                                  | [56]  |
| 24 | Peonidin 3-O-sophoroside                                         | [119] |
| 25 | Nobiletin                                                        | [36]  |
| 26 | 1,3-Dicaffeoylquinic acid                                        | [100] |
| 27 | Myricetin-3-O- $\alpha$ -L-rhamnopyranoside                      | [120] |
| 28 | Quercetin 3-O-beta-D-glucopyranosyl-7-O-alpha-L-rhamnopyranoside | [102] |
| 29 | Quercetin 3-O-(6-malonyl-glucoside)"                             | [121] |

|    |                         |       |
|----|-------------------------|-------|
| 30 | 4-O-Caffeoylquinic acid | [122] |
| 31 | Cirsimaritin            | [123] |

**Table S24.** Phytochemicals of spearmint with antioxidant activity according to international literature.

| Sr. No. | Component name               | Formatted Citation |
|---------|------------------------------|--------------------|
| 1       | Nicotiflorin                 | [69]               |
| 2       | Scutellarin                  | [59]               |
| 3       | Rosmarinic acid              | [56]               |
| 4       | Diosmin                      | [79]               |
| 5       | Luteolin                     | [88]               |
| 6       | Hesperidin                   | [108]              |
| 7       | Vanillylmandelic acid        | [63]               |
| 8       | Caffeoyl tartaric acid       | [137]              |
| 9       | Salvianolic acid B_1         | [54]               |
| 10      | Salvianolic Acid A           | [138]              |
| 11      | Apigenin-7-O-glucuronide     | [130]              |
| 12      | Lithospermic acid B          | [139]              |
| 13      | Rutin                        | [52]               |
| 14      | Luteolin 7-O-diglucuronide_1 | [55]               |
| 15      | Luteolin 7-O-glucoside       | [87]               |
| 16      | Eupatilin                    | [43]               |
| 17      | Chicoric acid                | [80]               |
| 18      | Genkwanin                    | [140]              |
| 19      | kaempferol 3-O-rutinoside    | [114]              |

|    |                                                 |       |
|----|-------------------------------------------------|-------|
| 20 | Isorhamnetin 3-O-glucoside                      | [116] |
| 21 | Cynarin                                         | [64]  |
| 22 | 1,3-Dicaffeoylquinic acid                       | [100] |
| 23 | 3,4-Dicaffeoylquinic Acid                       | [68]  |
| 24 | Apigenin 7-O-diglucuronide                      | [130] |
| 25 | Oleuropein                                      | [96]  |
| 26 | Allobetonicoside                                | [113] |
| 27 | Acteoside                                       | [132] |
| 28 | Melittoside                                     | [129] |
| 29 | Rhoifolin                                       | [141] |
| 30 | Manghaslin (Quercetin 3-2G-rhamnosylrutinoside) | [105] |

**Table S25.** Phytochemicals of levander with antioxidant activity according to international literature.

| <b>.Sr. No.</b> | <b>Component name</b>        | <b>Formatted Citation</b> |
|-----------------|------------------------------|---------------------------|
| 1               | Luteolin 7-O-diglucuronide_2 | [87]                      |
| 2               | Scutellarin                  | [59]                      |
| 3               | Salvianolic acid B_2         | [54]                      |
| 4               | Rosmarinic acid              | [87]                      |
| 5               | Luteolin                     | [88]                      |
| 6               | ferulic acid-4'-O-glucoside  | [57]                      |
| 7               | Apigenin-7-O-glucoside       | [89]                      |
| 8               | D-(+)-Mannose                | [90]                      |



|    |                                                     |      |
|----|-----------------------------------------------------|------|
| 9  | Apigenin                                            | [91] |
| 10 | Pinoresinol-4-O-Beta-Monoglycoside                  | [72] |
| 11 | Quercitrin (Quercetin-3-O-alpha-L-rhamnopyranoside) | [92] |
| 12 | Luteolin-3-O-glucuronide                            | [93] |
| 13 | Quercetin 3'-O-glucuronide                          | [94] |
| 14 | Chicoric acid                                       | [80] |
| 15 | Melittoside                                         | [95] |
| 16 | Oleuropein                                          | [96] |
| 17 | Theaflavin 3-O-gallate_1                            | [65] |
| 18 | Aucubin                                             | [81] |
| 19 | Silybin                                             | [84] |
| 20 | Luteolin 7-O-diglucuronide_1                        | [55] |
| 21 | Cynarin                                             | [64] |
| 22 | Astragalin                                          | [69] |
| 23 | Acteoside                                           | [83] |
| 24 | Salvianolic acid C                                  | [60] |
| 25 | 5-Feruloylquinic acid                               | [86] |
| 26 | 5-O-Caffeoylquinic acid                             | [97] |

**Table S26.** Phytochemicals of lemon balm with antioxidant activity according to international literature.

| Sr. No. | Component name  | Formatted citation |
|---------|-----------------|--------------------|
| 1       | Rosmarinic acid | [56]               |

|    |                                                                  |        |
|----|------------------------------------------------------------------|--------|
| 2  | Chicoric acid                                                    | [80]   |
| 3  | Genkwanin                                                        | [98]). |
| 4  | Salvianolic Acid A                                               | [99]   |
| 5  | 1,3-Dicaffeoylquinic acid                                        | [100]  |
| 6  | Quercitrin (Quercetin-3-O-alpha-L-rhamnopyranoside)              | [92]   |
| 7  | Quercetin 3-O-beta-D-glucopyranosyl-7-O-alpha-L-rhamnopyranoside | [102]  |
| 8  | Diosmetin                                                        | [79]   |
| 9  | Sucrose                                                          | [39]   |
| 10 | Luteolin                                                         | [88]   |
| 11 | Luteolin 7-O-glucoside                                           | [103]  |
| 12 | Salvianolic acid B_1                                             | [54]   |
| 13 | Theaflavin 3-O-gallate_1                                         | [65]   |
| 14 | Nicotiflorin                                                     | [101]  |
| 15 | Lithospermic acid B                                              | [57]   |
| 16 | Luteolin 7-O-diglucuronide_1                                     | [55]   |
| 17 | Acteoside                                                        | [83]   |
| 18 | Leucosceptoside A                                                | [51]   |
| 19 | Silydianin                                                       | [104]  |
| 20 | Manghaslin (Quercetin 3-2G-rhamnosylrutinoside)                  | [105]  |
| 21 | Echinacoside                                                     | [50]   |
| 22 | Vanillylmandelic acid                                            | [63]   |
| 23 | Achillolide A                                                    | [106]  |
| 24 | Silybin                                                          | [84]   |
| 25 | Glucobrassicinapin                                               | [107]  |

**Table S27.** Phytochemicals of sideritis with antioxidant activity according to international literature.

| <b>Sr. No.</b> | <b>Component name</b>              | <b>Formatted Citation</b> |
|----------------|------------------------------------|---------------------------|
| 1              | Acteoside                          | [132]                     |
| 2              | Apigenin-7-O-glucoside             | [89]                      |
| 3              | Teupolioside                       | [131]                     |
| 4              | Bergenin                           | [133]                     |
| 5              | Apigenin                           | [91]                      |
| 6              | Cirsilineol_1                      | [134]                     |
| 7              | Kaempferol 3-O-sophoroside         | [15]                      |
| 8              | Leucosceptoside A                  | [51]                      |
| 9              | 5-Feruloylquinic acid              | [97]                      |
| 10             | kaempferol 3-O-rutinoside          | [114]                     |
| 11             | Pectolarigenin                     | [61]                      |
| 12             | Pinoresinol-4-O-Beta-Monoglycoside | [72]                      |
| 13             | Geniposidic-Acid                   | [75]                      |
| 14             | Luteolin 7-O-diglucuronide_2       | [55]                      |
| 15             | Hesperidin                         | [108]                     |
| 16             | Nicotiflorin                       | [69]                      |
| 17             | Rhamnetin 3-glucoside              | [135]                     |
| 18             | 3,4-Dicaffeoylquinic Acid          | [68]                      |
| 19             | Lithospermic acid B                | [57]                      |
| 20             | Citric acid                        | [117]                     |
| 21             | Isoacteoside                       | [76]                      |

|    |                              |       |
|----|------------------------------|-------|
| 22 | 1,3-Dicaffeoylquinic acid    | [100] |
| 23 | Oleuropein                   | [96]  |
| 24 | Luteolin 7-O-diglucuronide_1 | [55]  |

**Table S28.** Phytochemicals of St. John's wort with antioxidant activity according to international literature.

| Sr. No | Component name                              | Formatted Citation |
|--------|---------------------------------------------|--------------------|
| 1      | Quercetin-3-O-glucoside                     | [115]              |
| 2      | Astragalin                                  | [143]              |
| 3      | Kaempferol                                  | [145]              |
| 4      | Apigenin-7-O-glucuronide                    | [130]              |
| 5      | Chicoric acid                               | [80]               |
| 6      | Allobetonicoside                            | [113]              |
| 7      | Apigenin-7-O-glucoside                      | [89]               |
| 8      | Quercetin                                   | [137]              |
| 9      | Hyperoside                                  | [146]              |
| 10     | Myricetin-3-O- $\alpha$ -L-rhamnopyranoside | [120]              |
| 11     | Amentoflavone                               | [144]              |
| 12     | Cinnamtannin A2_1                           | [142]              |
| 13     | Kaempferol-3-o-glucuronide                  | [147]              |
| 14     | Rutin                                       | [52]               |
| 15     | Myricetin-3-O-galactopyranoside             | [148]              |
| 16     | Oleuropein                                  | [96]               |
| 17     | Pinoresinol-4-O-Beta-Monoglycoside          | [72]               |
| 18     | Caffeic acid                                | [149]              |

|    |            |       |
|----|------------|-------|
| 19 | Betonicine | [150] |
| 20 | Phloridzin | [151] |

**Table S29.** Phytochemicals of rosehip with antioxidant activity according to international literature.

| Sr. No. | Component name                    | Formatted Citaion |
|---------|-----------------------------------|-------------------|
| 1       | Astilbin                          | [111]             |
| 2       | Valoneic acid dilactone           | [124]             |
| 3       | 5-O-Galloylquinic acid            | [125]             |
| 4       | Protocatechuic acid 4-O-glucoside | [126]             |
| 5       | Nicotiflorin                      | [69]              |
| 6       | Taxifolin                         | [127]             |
| 7       | Ascorbic acid (L-)                | [128]             |
| 8       | Sucrose                           | [39]              |
| 9       | Melittoside                       | [129]             |
| 10      | Diosmin                           | [79]              |
| 11      | Apigenin 7-O-diglucuronide        | [130]             |
| 12      | Hexose                            | [124]             |

**Table S30.** Polyphenolic components of each studied plant.

| Polyphenolic Components |                                                                                                               |                             |                              |                           |                          |                       |                             |                       |                                   |
|-------------------------|---------------------------------------------------------------------------------------------------------------|-----------------------------|------------------------------|---------------------------|--------------------------|-----------------------|-----------------------------|-----------------------|-----------------------------------|
| Sr. No                  | Bitter Orange                                                                                                 | Dittany                     | Lemon Peel                   | Spearmint                 | St. John's wort          | Lemon Balm            | Lavender                    | Sideritis             | Rosehip                           |
| 1                       | 1,2-Disinapoylgen tiobiose                                                                                    | 3,4-Dicaffeoylquinic Acid   | Quercetin-3-O-glucoside      | Luteolin                  | Quercetin-3-O-glucoside  | Rosmarinic acid       | Rosmarinic acid             | Cirsilineol_1         | Apigenin 7-O-diglucuronide        |
| 2                       | Isoscutellarein 7-O-[6'''-O-acetyl- $\beta$ -D-allopyranosyl-(1 $\rightarrow$ 2)]- $\beta$ -D-glucopyranoside | Rosmarinic acid             | Luteolin 7-O-glucoside       | 1,3-Dicaffeoylquinic acid | Astragalin               | Lithospermic acid B   | Luteolin-3-O-glucuronide    | Bergenin              | Valoneic acid dilactone           |
| 3                       | Rhoifolin                                                                                                     | Salvianolic acid C          | Rutin                        | Luteolin 7-O-glucoside    | Rutin                    | Vanillylmandelic acid | Vanillylmandelic acid       | Leucosceptoside A     | 5-O-Galloylquinic acid            |
| 4                       | Eriocitrin_1                                                                                                  | Lithospermic acid B         | Rosmarinic acid              | Vanillylmandelic acid     | Amentoflavone            | Diosmetin             | Apigenin                    | Lithospermic acid B   | Astilbin                          |
| 5                       | Orientin                                                                                                      | Vanillylmandelic acid       | Isorhamnetin 3-O-glucoside   | Rosmarinic acid           | Apigenin-7-O-glucuronide | Salvianolic acid B_1  | Ferulic acid-4'-O-glucoside | 5-Feruloylquinic acid | Taxifolin                         |
| 6                       | Salvianolic acid G                                                                                            | Ferulic acid-4'-O-glucoside | Isorhamnetin 3-O-galactoside | Lithospermic acid B       | Kaempferol               | Nicotiflorin          | Salvianolic acid B_2        | Apigenin              | Protocatechuic acid 4-O-glucoside |

|    |                                 |                          |                             |                            |                              |                           |                              |                              |                                      |
|----|---------------------------------|--------------------------|-----------------------------|----------------------------|------------------------------|---------------------------|------------------------------|------------------------------|--------------------------------------|
| 7  | Kaempferol 3-O-acetyl-glucoside | Diosmin                  | Chrysoeriol                 | Isorhamnetin 3-O-glucoside | Cinnamtannin A2_1            | 1,3-Dicaffeoylquinic acid | Luteolin 7-O-diglucuronide_2 | Kaempferol 13-O-sophoroside  | Nicotiflorin                         |
| 8  | Nicotiflorin                    | Salvianolic acid B_1     | Hesperidin                  | Apigenin-7-O-glucuronide   | Quercetin                    | Leucosceptoside A         | Luteolin                     | Acteoside                    | Diosmin                              |
| 9  | Didymin                         | Isoacteoside             | Hesperetin                  | Apigenin 7-O-diglucuronide | Chicoric acid                | Salvianolic Acid A        | Theaflavin 3-O-gallate_1     | Hesperidin                   | Quercetin 3-arabinoside              |
| 10 | 5-Feruloylquinic acid           | 6"-O-Malonylgenistin     | Eriocitrin_1                | Salvianolic Acid A         | Apigenin-7-O-glucoside       | Luteolin                  | Quercetin 3'-O-glucuronide   | Luteolin 7-O-diglucuronide_1 | Dihydroferulic acid 4-O-glucuronide  |
| 11 | Rutin                           | Naringenin 7-O-glucoside | Astilbin                    | Eupatilin                  | Luteolin 4'-glucoside        | Genkwanin                 | Chicoric acid                | Luteolin 7-O-diglucuronide_2 | Dihydroferulic acid-4'-O-glucuronide |
| 12 | 3,4-Dicaffeoylquinic Acid       | Cirsilineol_1            | Isorhamnetin-3-O-rutinoside | Genkwanin                  | Quercetin 3,4'-O-diglucoside | Theaflavin 3-O-gallate_1  | Scutellarin                  | Pectolinarigenin             | Genistein 4',7-O-diglucuronide       |
| 13 | Ferulic acid-4'-O-glucoside     | Glucogallin              | Hispidulin glucuronide      | Caffeoyl tartaric acid     | Cinnamtannin A2_2            | Chicoric acid             | Silybin                      | Rhamnetin 3-glucoside        | 6"-O-Malonylgenistin                 |

|    |                             |                            |                                                                                 |                              |                                      |                                            |                                     |                                                                                 |  |
|----|-----------------------------|----------------------------|---------------------------------------------------------------------------------|------------------------------|--------------------------------------|--------------------------------------------|-------------------------------------|---------------------------------------------------------------------------------|--|
| 14 | Eupatilin                   | Cafestol (2-hydroxy-)      | Orientin                                                                        | Chicoric acid                | Kaempferol 3-O-sophoroside           | Acteoside                                  | Apigenin-7-O-glucoside              | kaempferol 3-O-rutinoside                                                       |  |
| 15 | Kaempferol 3-O-sophoroside  | Rutin                      | kaempferol 3-O-rutinoside                                                       | Hesperidin                   | 5-O-Caffeoylshikimic acid            | Caffeoyl tartaric acid                     | Caffeoyl tartaric acid              | Apigenin-7-O-glucoside                                                          |  |
| 16 | Barbatoside C/D             | Theaflavin 3-O-gallate_1   | Nicotiflorin                                                                    | Luteolin 7-O-diglucuronide_1 | Myricetin 7-glucoside                | Salvianolic acid B_2                       | Lithospermic acid_1                 | Nicotiflorin                                                                    |  |
| 17 | Isorhamnetin-3-O-rutinoside | Orientin                   | Diosmin                                                                         | Cynarin                      | Quercetin 3'-O-glucuronide           | Caffeic acid 4-O-glucoside                 | Dihydroferulic acid 4-O-glucuronide | 3,4-Dicaffeoylquinic Acid                                                       |  |
| 18 | Quercetin 3-arabinoside     | Chicoric acid              | Isoscutellarein 7-O-[6'''-O-acetyl-β-d-allopyranosyl-(1→2)]-β-d-glucopyranoside | kaempferol 3-O-rutinoside    | Dihydroferulic acid-4'-O-glucuronide | Isorhamnetin 3-O-galactoside               | Naringenin-4',5-diglucuronide       | Isoscutellarein 7-O-[6'''-O-acetyl-β-d-allopyranosyl-(1→2)]-β-d-glucopyranoside |  |
| 19 | Bergenin                    | Kaempferol 3-O-sophoroside | 6''-O-Malonyldaidzin                                                            | Scutellarin                  | Dihydroferulic acid 4-O-glucuronide  | Naringenin-4',5-diglucuronide              | Isorhamnetin 3-O-galactoside        | Cirsilineol_2                                                                   |  |
| 20 | Cirsilineol_1               | Scutellarin                | Isorhamnetin 3-O-glucoside 7-O-rhamnoside                                       | Salvianolic acid B_1         | Coumaroylquinic acid                 | Kaempferol 3-O-(6''-acetyl-galactoside) 7- | Hispidulin glucuronide              | Isoscutellarein 7-O-[6'-O-acetyl-β-D-                                           |  |



|    |                                                      |                              |                                   |                                           |                                 |                                                 |                              |                                                       |  |
|----|------------------------------------------------------|------------------------------|-----------------------------------|-------------------------------------------|---------------------------------|-------------------------------------------------|------------------------------|-------------------------------------------------------|--|
|    |                                                      |                              |                                   |                                           |                                 | O-rhamnoside                                    |                              | allopyranosyl-(1→2)]-6"-O-acetyl-β-D-glucopyranoside" |  |
| 21 | Eriocitrin_2                                         | Eupatorin                    | Salvianolic acid G                | Nicotiflorin                              | Salvianolic acid G              | Dihydroferulic acid-4'-O-glucuronide            | Salvianolic acid C           | Genistein 4',7-O-diglucuronide                        |  |
| 22 | Spinacetin 3-O-glucosyl-(1→6)-glucoside              | Homoplantaginin_Tectoridin   | Chrysoeriol 7-O-apiosyl-glucoside | 3,4-Dicaffeoylquinic Acid                 | Myricetin-3-O-galactopyranoside | 6"-O-Malonyldaidzin                             | 5-Feruloylquinic acid        | Luteolin 4'-glucoside                                 |  |
| 23 | Quercetin 3-O-(6"-acetyl-galactoside) 7-O-rhamnoside | Luteolin 7-O-diglucuronide_1 | Ferulic acid-4'-O-glucoside       | Diosmin                                   | Kaempferol-3-o-glucuronide      | Luteolin 7-O-diglucuronide_1                    | Astragalin                   | Antoside                                              |  |
| 24 | Isorhamnetin 3-O-galactoside                         | Juglanin                     | Naringenin-4',5-diglucuronide     | Luteolin-3-O-glucuronide                  | Hyperoside                      | Silydianin                                      | 5-O-Caffeoylquinic acid      | Apigenin 7-O-apiosyl-glucoside                        |  |
| 25 | 5,5'-Dicaffeic acid                                  | Isorhamnetin 3-O-glucoside   | 6"-O-Malonylgenistin              | Isorhamnetin 3-O-glucoside 7-O-rhamnoside | Phloridzin                      | Manghaslin (Quercetin 3-2G-rhamnosylrutinoside) | Luteolin 7-O-diglucuronide_1 | Kaempferol 13-O-acetyl-glucoside                      |  |
| 26 | Manghaslin (Quercetin 3-2G-                          | Pectolinarigenin             | Antoside                          | Chrysoeriol 7-O-apiosyl-glucoside         | Caffeic acid                    | Luteolin 7-O-glucoside                          | Cynarin                      | Isoacteoside                                          |  |

|    |                         |                                   |                                                       |                                                          |                                             |                              |                                                          |                           |  |
|----|-------------------------|-----------------------------------|-------------------------------------------------------|----------------------------------------------------------|---------------------------------------------|------------------------------|----------------------------------------------------------|---------------------------|--|
|    | ramnosylrutinoside)     |                                   |                                                       |                                                          |                                             |                              |                                                          |                           |  |
| 27 | Quercetin-3-O-glucoside | Cynarin                           | Isorhamnetin 4'-O-glucuronide                         | Ferulic acid-4'-O-glucoside                              | Myricetin-3-O- $\alpha$ -L-rhamnopyranoside | Silybin                      | Acteoside                                                | 1,3-Dicaffeoylquinic acid |  |
| 28 | Feruloyl C1-glucuronide | Astilbin                          | Kaempferol 3-O-(6''-acetylgalactoside) 7-O-rhamnoside | Antoside                                                 | Quercetin 3-glucuronate                     | Luteolin-3-O-glucuronide     | Luteolin 4'-glucoside                                    |                           |  |
| 29 | Neodiosmin              | Genistein 4',7-O-diglucuronide    | Homoplantagininetectoridin                            | Naringenin-4',5-diglucuronide                            | Naringenin 5-O-glucuronide                  | Luteolin 4'-glucoside        | Kaempferol 3-rhamnosyl-(1->2)-rhamnosyl-(1->6)-glucoside |                           |  |
| 30 | Glucogallin             | Lithospermic acid_1               | Apigenin 7-O-apiosyl-glucoside                        | Kaempferol 3-rhamnosyl-(1->2)-rhamnosyl-(1->6)-glucoside | Quercetin 3-arabinoside                     | Lithospermic acid_1          |                                                          |                           |  |
| 31 | Apigenin-7-O-glucoside  | Chrysoeriol 7-O-apiosyl-glucoside | Quercetin 3-O-(6-malonylglucoside)''                  | 6''-O-Malonyldaidzine                                    | Chrysoeriol 7-O-apiosyl-glucoside           | Hydroxytyrosol 4-O-glucoside |                                                          |                           |  |
| 32 | 6''-O-Malonyldaidzine   | Isorhamnetin 3-O-galactoside      | Nobiletin                                             | Salvianolic acid G                                       | Luteolin-3-O-glucuronide                    |                              |                                                          |                           |  |

|    |                                                      |                                                          |                                             |                                                 |  |  |  |  |  |
|----|------------------------------------------------------|----------------------------------------------------------|---------------------------------------------|-------------------------------------------------|--|--|--|--|--|
| 33 | Caffeoyl tartaric acid                               | Naringenin-4',5-diglucuronide                            | 1,3-Dicaffeoylquinic acid                   | Quercetin 3-arabinoside                         |  |  |  |  |  |
| 34 | Naringenin-4',5-diglucuronide                        | Kaempferol 3-rhamnosyl-(1->2)-rhamnosyl-(1->6)-glucoside | 4-O-Caffeoylquinic acid                     | Manghaslin (Quercetin 3-2G-rhamnosylrutinoside) |  |  |  |  |  |
| 35 | Luteolin 4'-glucoside                                | 5-Feruloylquinic acid                                    | Byakangelicin                               | Rhoifolin                                       |  |  |  |  |  |
| 36 | Apigenin 7-O-apiosyl-glucoside                       | Silybin                                                  | Myricetin-3-O- $\alpha$ -L-rhamnopyranoside | Luteolin 7-O-rutinoside                         |  |  |  |  |  |
| 37 | Patulitrin                                           | Acteoside                                                | Cirsimaritin                                | 5-O-Caffeoylshikimic acid                       |  |  |  |  |  |
| 38 | Kaempferol 3-O-(6"-acetylgalactoside) 7-O-rhamnoside | Lithospermic acid                                        | Peonidin 3-O-sophoroside                    | Lithospermic acid_1                             |  |  |  |  |  |
| 39 | Luteolin 7-O-diglucuronide_1                         | Apigenin 7-O-diglucuronide                               | Coumaroyl tartaric acid (p-)                | Quercetin 3-rutinoside-7-glucoside              |  |  |  |  |  |
| 40 | Myricetin 3- $\alpha$ -L-arabinopyranoside           | Hispidulin glucuronide                                   | Spinacetin 3-O-glucosyl-(1->6)-glucoside    |                                                 |  |  |  |  |  |
| 41 | Cirsimaritin                                         | Hydroxytyrosol 4-O-glucoside                             |                                             |                                                 |  |  |  |  |  |

|    |                                                                                      |  |  |  |  |  |  |  |  |
|----|--------------------------------------------------------------------------------------|--|--|--|--|--|--|--|--|
| 42 | Leucosceptosi<br>de A                                                                |  |  |  |  |  |  |  |  |
| 43 | Luteolin 7-O-<br>rutinoside                                                          |  |  |  |  |  |  |  |  |
| 44 | 5,7-<br>Dihydroxychr<br>omone                                                        |  |  |  |  |  |  |  |  |
| 45 | Nobiletin                                                                            |  |  |  |  |  |  |  |  |
| 46 | Morroniside                                                                          |  |  |  |  |  |  |  |  |
| 47 | Quercetin 3-<br>rutinoside-7-<br>glucoside                                           |  |  |  |  |  |  |  |  |
| 48 | Peonidin 3-O-<br>sophoroside                                                         |  |  |  |  |  |  |  |  |
| 49 | Pelargonidin<br>3-O-rutinoside                                                       |  |  |  |  |  |  |  |  |
| 50 | Chrysoeriol 7-<br>O-apiosyl-<br>glucoside                                            |  |  |  |  |  |  |  |  |
| 51 | 6''-O-<br>Acetylgenistin                                                             |  |  |  |  |  |  |  |  |
| 52 | 5-(3'-<br>hydroxypheny<br>l)-gamma-<br>hydroxyvaleri<br>c acid -4'-O-<br>glucuronide |  |  |  |  |  |  |  |  |

## References:

- [1] X. L. PIAO, H. Y. KIM, T. YOKOZAWA, Y. A. LEE, X. S. PIAO, and E. J. CHO, "Protective Effects of Broccoli (*Brassica oleracea*) and Its Active Components against Radical-Induced Oxidative Damage," *J Nutr Sci Vitaminol (Tokyo)*, vol. 51, no. 3, pp. 142–147, 2005, doi: 10.3177/jnsv.51.142.
- [2] B. Zou, T. Li, Y. Xu, Y. Yu, and J. Wu, "Structural identification and antioxidant potency evaluation of pomelo vinegar polyphenols," *Food Biosci*, vol. 47, p. 101674, Jun. 2022, doi: 10.1016/j.fbio.2022.101674.
- [3] L. Yao, W. Liu, M. Bashir, M. F. Nisar, and C. (Craig) Wan, "Eriocitrin: A review of pharmacological effects," *Biomedicine & Pharmacotherapy*, vol. 154, p. 113563, Oct. 2022, doi: 10.1016/j.biopha.2022.113563.
- [4] S. Nagai, C. Matsumoto, M. Shibano, and K. Fujimori, "Suppression of Fatty Acid and Triglyceride Synthesis by the Flavonoid Orientin through Decrease of C/EBP $\delta$  Expression and Inhibition of PI3K/Akt-FOXO1 Signaling in Adipocytes," *Nutrients*, vol. 10, no. 2, p. 130, Jan. 2018, doi: 10.3390/nu10020130.
- [5] M. J. Larrazábal-Fuentes *et al.*, "Chemical Profiling, Antioxidant, Anticholinesterase, and Antiprotozoal Potentials of *Artemisia copa* Phil. (Asteraceae)," *Front Pharmacol*, vol. 11, Dec. 2020, doi: 10.3389/fphar.2020.594174.
- [6] A. Hameed, N. Iqbal, and S. A. Malik, "Effect of d-mannose on antioxidant defense and oxidative processes in etiolated wheat coleoptiles," *Acta Physiol Plant*, vol. 36, no. 1, pp. 161–167, Jan. 2014, doi: 10.1007/s11738-013-1396-5.
- [7] S. Bakir, S. Kamiloglu, M. Tomas, and E. Capanoglu, "Tomato Polyphenolics: Putative Applications to Health and Disease," in *Polyphenols: Mechanisms of Action in Human Health and Disease*, Elsevier, 2018, pp. 93–102. doi: 10.1016/B978-0-12-813006-3.00009-X.
- [8] K. Shukla, H. Sonowal, A. Saxena, and K. v. Ramana, "Didymin by suppressing NF- $\kappa$ B activation prevents VEGF-induced angiogenesis in vitro and in vivo," *Vascul Pharmacol*, vol. 115, pp. 18–25, Apr. 2019, doi: 10.1016/j.vph.2019.01.002.
- [9] X. Ao *et al.*, "Extraction, isolation and identification of four phenolic compounds from *Pleuroblastus amarus* shoots and their antioxidant and anti-inflammatory properties in vitro," *Food Chem*, vol. 374, p. 131743, Apr. 2022, doi: 10.1016/j.foodchem.2021.131743.
- [10] B. Lue, A. M. Sørensen, C. Jacobsen, Z. Guo, and X. Xu, "Antioxidant efficacies of rutin and rutin esters in bulk oil and oil-in-water emulsion," *European Journal of Lipid Science and Technology*, vol. 119, no. 4, p. 1600049, Apr. 2017, doi: 10.1002/ejlt.201600049.

- [11] Y. J. Hyun *et al.*, "3,4-Dicaffeoylquinic acid protects human keratinocytes against environmental oxidative damage," *J Funct Foods*, vol. 52, pp. 430–441, Jan. 2019, doi: 10.1016/j.jff.2018.11.026.
- [12] A. K. Ghimeray, C.-W. Jin, B. K. Ghimire, and D. H. Cho, "Antioxidant activity and quantitative estimation of azadirachtin and nimbin in *Azadirachta Indica* A. Juss grown in foothills of Nepal," *Afr J Biotechnol*, vol. 8, no. 13, pp. 3084–3091, 2009, [Online]. Available: <http://www.academicjournals.org/AJB>
- [13] A. Piazzon, U. Vrhovsek, D. Masuero, F. Mattivi, F. Mandoj, and M. Nardini, "Antioxidant Activity of Phenolic Acids and Their Metabolites: Synthesis and Antioxidant Properties of the Sulfate Derivatives of Ferulic and Caffeic Acids and of the Acyl Glucuronide of Ferulic Acid," *J Agric Food Chem*, vol. 60, no. 50, pp. 12312–12323, Dec. 2012, doi: 10.1021/jf304076z.
- [14] A. Rosa, R. Isola, F. Pollastro, P. Caria, G. Appendino, and M. Nieddu, "The dietary flavonoid eupatilin attenuates *in vitro* lipid peroxidation and targets lipid profile in cancer HeLa cells," *Food Funct*, vol. 11, no. 6, pp. 5179–5191, 2020, doi: 10.1039/D0FO00777C.
- [15] G. W. Plumb, K. R. Price, M. J. C. Modes, and G. Williamson, "Antioxidant Properties of the Major Polyphenolic Compounds in Broccoli," *Free Radic Res*, vol. 27, no. 4, pp. 429–435, Jan. 1997, doi: 10.3109/10715769709065782.
- [16] Y. D. Singh, D. Das, S. Das, K. D. Swain, S. Pradhan, and P. J. Babu, "Pharmacological activities of limonin from Khasi Mandarin as therapeutic applications," *Pharmacological Research - Modern Chinese Medicine*, vol. 5, p. 100181, Dec. 2022, doi: 10.1016/j.prmcm.2022.100181.
- [17] M. Shibano, K. Kakutani, M. Taniguchi, M. Yasuda, and K. Baba, "Antioxidant constituents in the dayflower (*Commelina communis* L.) and their  $\alpha$ -glucosidase-inhibitory activity," *J Nat Med*, vol. 62, no. 3, pp. 349–353, Jul. 2008, doi: 10.1007/s11418-008-0244-1.
- [18] H. A. de Abreu, I. Aparecida dos S. Lago, G. P. Souza, D. Piló-Veloso, H. A. Duarte, and A. F. de C. Alcântara, "Antioxidant activity of (+)-bergenin—a phytoconstituent isolated from the bark of *Sacoglottis uchi* Huber (Humireaceae)," *Org Biomol Chem*, vol. 6, no. 15, p. 2713, 2008, doi: 10.1039/b804385j.
- [19] M. A. Kelm, M. G. Nair, G. M. Strasburg, and D. L. DeWitt, "Antioxidant and cyclooxygenase inhibitory phenolic compounds from *Ocimum sanctum* Linn.," *Phytomedicine*, vol. 7, no. 1, pp. 7–13, Mar. 2000, doi: 10.1016/S0944-7113(00)80015-X.
- [20] L. Yao, W. Liu, M. Bashir, M. F. Nisar, and C. (Craig) Wan, "Eriocitrin: A review of pharmacological effects," *Biomedicine & Pharmacotherapy*, vol. 154, p. 113563, Oct. 2022, doi: 10.1016/j.biopha.2022.113563.

- [21] Z. Kokanova-Nedialkova and P. T. Nedialkov, "Antioxidant properties of 6-methoxyflavonol glycosides from the aerial parts of *Chenopodium bonus-henricus* L. ACTIVITY-GUIDED ANALYSIS OF THE ANTICANCER METABOLITES OF UNSTUDIED SPECIES OF THE BULGARIAN FLORA AND CERTIFIED FOREIGN HYBRIDS OF GENUS *JUNIPERUS* L. (CUPRESSACEAE) USING MODERN RESEARCH TECHNOLOGIES View project," 2017. [Online]. Available: <https://www.researchgate.net/publication/324562545>
- [22] M. Shibano, K. Kakutani, M. Taniguchi, M. Yasuda, and K. Baba, "Antioxidant constituents in the dayflower (*Commelina communis* L.) and their  $\alpha$ -glucosidase-inhibitory activity," *J Nat Med*, vol. 62, no. 3, pp. 349–353, Jul. 2008, doi: 10.1007/s11418-008-0244-1.
- [23] A. Nugroho, H. Heryani, J. S. Choi, and H.-J. Park, "Identification and quantification of flavonoids in *Carica papaya* leaf and peroxynitrite-scavenging activity," *Asian Pac J Trop Biomed*, vol. 7, no. 3, pp. 208–213, Mar. 2017, doi: 10.1016/j.apjtb.2016.12.009.
- [24] S. M. Razavi, S. Zahri, G. Zarrini, H. Nazemiyeh, and S. Mohammadi, "Biological activity of quercetin-3-O-glucoside, a known plant flavonoid," *Russ J Bioorg Chem*, vol. 35, no. 3, pp. 376–378, May 2009, doi: 10.1134/S1068162009030133.
- [25] M. de la L. Cádiz-Gurrea, D. Pinto, C. Delerue-Matos, and F. Rodrigues, "Olive Fruit and Leaf Wastes as Bioactive Ingredients for Cosmetics—A Preliminary Study," *Antioxidants*, vol. 10, no. 2, p. 245, Feb. 2021, doi: 10.3390/antiox10020245.
- [26] A. Piazzon, U. Vrhovsek, D. Masuero, F. Mattivi, F. Mandoj, and M. Nardini, "Antioxidant Activity of Phenolic Acids and Their Metabolites: Synthesis and Antioxidant Properties of the Sulfate Derivatives of Ferulic and Caffeic Acids and of the Acyl Glucuronide of Ferulic Acid," *J Agric Food Chem*, vol. 60, no. 50, pp. 12312–12323, Dec. 2012, doi: 10.1021/jf304076z.
- [27] E. da Pozzo *et al.*, "Antioxidant and Antisenescence Effects of Bergamot Juice," *Oxid Med Cell Longev*, vol. 2018, pp. 1–14, Jul. 2018, doi: 10.1155/2018/9395804.
- [28] A. N. Khan *et al.*, "A Short Review on Glucogallin and its Pharmacological Activities," *Mini-Reviews in Medicinal Chemistry*, vol. 22, no. 22, pp. 2820–2830, Dec. 2022, doi: 10.2174/1389557522666220513150907.
- [29] W. Wang *et al.*, "Efficiency comparison of apigenin-7-O-glucoside and trolox in antioxidative stress and anti-inflammatory properties," *Journal of Pharmacy and Pharmacology*, vol. 72, no. 11, pp. 1645–1656, Oct. 2020, doi: 10.1111/jphp.13347.
- [30] "Antioxidant Activity Of Patulitrin From *Tagetes Patula*," *Indian J Appl Res*.

- [31] S. Rehecho *et al.*, "Chemical composition, mineral content and antioxidant activity of *Verbena officinalis* L.," *LWT - Food Science and Technology*, vol. 44, no. 4, pp. 875–882, May 2011, doi: 10.1016/j.lwt.2010.11.035.
- [32] M.-K. Lee *et al.*, "Variation of glucosinolates in 62 varieties of Chinese cabbage (*Brassica rapa* L. ssp. *pekinensis*) and their antioxidant activity," *LWT - Food Science and Technology*, vol. 58, no. 1, pp. 93–101, Sep. 2014, doi: 10.1016/j.lwt.2014.03.001.
- [33] E. M. Ryan *et al.*, "Antioxidant properties of citric acid interfere with the uricase-based measurement of circulating uric acid," *J Pharm Biomed Anal*, vol. 164, pp. 460–466, Feb. 2019, doi: 10.1016/j.jpba.2018.11.011.
- [34] H. Okamura, A. Mimura, Y. Yakou, M. Niwano, and Y. Takahara, "Antioxidant activity of tannins and flavonoids in *Eucalyptus rostrata*," *Phytochemistry*, vol. 33, no. 3, pp. 557–561, Jun. 1993, doi: 10.1016/0031-9422(93)85448-Z.
- [35] B. Zou, T. Li, Y. Xu, Y. Yu, and J. Wu, "Structural identification and antioxidant potency evaluation of pomelo vinegar polyphenols," *Food Biosci*, vol. 47, p. 101674, Jun. 2022, doi: 10.1016/j.fbio.2022.101674.
- [36] M. Wang *et al.*, "Antioxidant Protection of Nobiletin, 5-Demethylnobiletin, Tangeretin, and 5-Demethyltangeretin from Citrus Peel in *Saccharomyces cerevisiae*," *J Agric Food Chem*, vol. 66, no. 12, pp. 3155–3160, Mar. 2018, doi: 10.1021/acs.jafc.8b00509.
- [37] X. L. PIAO, H. Y. KIM, T. YOKOZAWA, Y. A. LEE, X. S. PIAO, and E. J. CHO, "Protective Effects of Broccoli (*Brassica oleracea*) and Its Active Components against Radical-Induced Oxidative Damage," *J Nutr Sci Vitaminol (Tokyo)*, vol. 51, no. 3, pp. 142–147, 2005, doi: 10.3177/jnsv.51.142.
- [38] S. Nagai, C. Matsumoto, M. Shibano, and K. Fujimori, "Suppression of Fatty Acid and Triglyceride Synthesis by the Flavonoid Orientin through Decrease of C/EBP $\delta$  Expression and Inhibition of PI3K/Akt-FOXO1 Signaling in Adipocytes," *Nutrients*, vol. 10, no. 2, p. 130, Jan. 2018, doi: 10.3390/nu10020130.
- [39] B. C. Q. Nguyen, M. Shahinozzaman, N. T. K. Tien, T. N. Thach, and S. Tawata, "Effect of sucrose on antioxidant activities and other health-related micronutrients in gamma-aminobutyric acid (GABA)-enriched sprouting Southern Vietnam brown rice," *J Cereal Sci*, vol. 93, p. 102985, May 2020, doi: 10.1016/j.jcs.2020.102985.
- [40] N. M. Kim, J. Kim, H. Y. Chung, and J. S. Choi, "Isolation of luteolin 7-O-rutinoside and esculetin with potential antioxidant activity from the aerial parts of *Artemisia montana*," *Arch Pharm Res*, vol. 23, no. 3, pp. 237–239, Jun. 2000, doi: 10.1007/BF02976451.



- [41] C. Frezza *et al.*, "Leucosceptosides A and B: Two Phenyl-Ethanoid Glycosides with Important Occurrence and Biological Activities," *Biomolecules*, vol. 12, no. 12, p. 1807, Dec. 2022, doi: 10.3390/biom12121807.
- [42] Y. D. Singh, D. Das, S. Das, K. D. Swain, S. Pradhan, and P. J. Babu, "Pharmacological activities of limonin from Khasi Mandarin as therapeutic applications," *Pharmacological Research - Modern Chinese Medicine*, vol. 5, p. 100181, Dec. 2022, doi: 10.1016/j.prmcm.2022.100181.
- [43] A. Rosa, R. Isola, F. Pollastro, P. Caria, G. Appendino, and M. Nieddu, "The dietary flavonoid eupatilin attenuates *in vitro* lipid peroxidation and targets lipid profile in cancer HeLa cells," *Food Funct*, vol. 11, no. 6, pp. 5179–5191, 2020, doi: 10.1039/D0FO00777C.
- [44] G. W. Plumb, K. R. Price, M. J. C. Modes, and G. Williamson, "Antioxidant Properties of the Major Polyphenolic Compounds in Broccoli," *Free Radic Res*, vol. 27, no. 4, pp. 429–435, Jan. 1997, doi: 10.3109/10715769709065782.
- [45] L. Yao, W. Liu, M. Bashir, M. F. Nisar, and C. (Craig) Wan, "Eriocitrin: A review of pharmacological effects," *Biomedicine & Pharmacotherapy*, vol. 154, p. 113563, Oct. 2022, doi: 10.1016/j.biopha.2022.113563.
- [46] T. Benali *et al.*, "The Current State of Knowledge in Biological Properties of Cirsimaritin," *Antioxidants*, vol. 11, no. 9, p. 1842, Sep. 2022, doi: 10.3390/antiox11091842.
- [47] K. Shukla, H. Sonowal, A. Saxena, and K. v. Ramana, "Didymin by suppressing NF- $\kappa$ B activation prevents VEGF-induced angiogenesis in vitro and in vivo," *Vascul Pharmacol*, vol. 115, pp. 18–25, Apr. 2019, doi: 10.1016/j.vph.2019.01.002.
- [48] J. Qiu *et al.*, "Screening natural antioxidants in peanut shell using DPPH–HPLC–DAD–TOF/MS methods," *Food Chem*, vol. 135, no. 4, pp. 2366–2371, Dec. 2012, doi: 10.1016/j.foodchem.2012.07.042.
- [49] H. Xu, J. Shen, H. Liu, Y. Shi, L. Li, and M. Wei, "Morroniside and loganin extracted from *Cornus officinalis* have protective effects on rat mesangial cell proliferation exposed to advanced glycation end products by preventing oxidative stress," *Can J Physiol Pharmacol*, vol. 84, no. 12, pp. 1267–1273, Dec. 2006, doi: 10.1139/y06-075.
- [50] B. D. Sloley, L. J. Urichuk, C. Tywin, R. T. Coutts, P. K. T. Pang, and J. J. Shan, "Comparison of chemical components and antioxidant capacity of different *Echinacea* species," *Journal of Pharmacy and Pharmacology*, vol. 53, no. 6, pp. 849–857, Feb. 2010, doi: 10.1211/0022357011776009.
- [51] C. Frezza *et al.*, "Leucosceptosides A and B: Two Phenyl-Ethanoid Glycosides with Important Occurrence and Biological Activities," *Biomolecules*, vol. 12, no. 12, p. 1807, Dec. 2022, doi: 10.3390/biom12121807.

- [52] B. Lue, A. M. Sørensen, C. Jacobsen, Z. Guo, and X. Xu, "Antioxidant efficacies of rutin and rutin esters in bulk oil and oil-in-water emulsion," *European Journal of Lipid Science and Technology*, vol. 119, no. 4, p. 1600049, Apr. 2017, doi: 10.1002/ejlt.201600049.
- [53] Y.-Z. Zheng, G. Deng, Q. Liang, D.-F. Chen, R. Guo, and R.-C. Lai, "Antioxidant Activity of Quercetin and Its Glucosides from Propolis: A Theoretical Study," *Sci Rep*, vol. 7, no. 1, p. 7543, Aug. 2017, doi: 10.1038/s41598-017-08024-8.
- [54] Z. Xiao *et al.*, "Pharmacological Effects of Salvianolic Acid B Against Oxidative Damage," *Front Pharmacol*, vol. 11, Nov. 2020, doi: 10.3389/fphar.2020.572373.
- [55] S. Rehecho *et al.*, "Chemical composition, mineral content and antioxidant activity of *Verbena officinalis* L.," *LWT - Food Science and Technology*, vol. 44, no. 4, pp. 875–882, May 2011, doi: 10.1016/j.lwt.2010.11.035.
- [56] A. G. Adomako-Bonsu, S. L. Chan, M. Pratten, and J. R. Fry, "Antioxidant activity of rosmarinic acid and its principal metabolites in chemical and cellular systems: Importance of physico-chemical characteristics," *Toxicology in Vitro*, vol. 40, pp. 248–255, Apr. 2017, doi: 10.1016/j.tiv.2017.01.016.
- [57] J. Damašius, P. R. Venskutonis, V. Kaškonienė, and A. Maruška, "Fast screening of the main phenolic acids with antioxidant properties in common spices using on-line HPLC/UV/DPPH radical scavenging assay," *Analytical Methods*, vol. 6, no. 8, p. 2774, 2014, doi: 10.1039/c3ay41703d.
- [58] M. A. Kelm, M. G. Nair, G. M. Strasburg, and D. L. DeWitt, "Antioxidant and cyclooxygenase inhibitory phenolic compounds from *Ocimum sanctum* Linn.," *Phytomedicine*, vol. 7, no. 1, pp. 7–13, Mar. 2000, doi: 10.1016/S0944-7113(00)80015-X.
- [59] M. Spiegel, T. Marino, M. Prejanò, and N. Russo, "Primary and secondary antioxidant properties of scutellarin and scutellarein in water and lipid-like environments: A theoretical investigation," *J Mol Liq*, vol. 366, p. 120343, Nov. 2022, doi: 10.1016/j.molliq.2022.120343.
- [60] L.-H. Chien, C.-T. Wu, J.-S. Deng, W.-P. Jiang, W.-C. Huang, and G.-J. Huang, "Salvianolic Acid C Protects against Cisplatin-Induced Acute Kidney Injury through Attenuation of Inflammation, Oxidative Stress and Apoptotic Effects and Activation of the CaMKK–AMPK–Sirt1-Associated Signaling Pathway in Mouse Models," *Antioxidants*, vol. 10, no. 10, p. 1620, Oct. 2021, doi: 10.3390/antiox10101620.
- [61] M. Shiraiwa, T. Kitakaze, Y. Yamashita, Y. Ukawa, K. Mukai, and H. Ashida, "Pectolarigenin Induces Antioxidant Enzymes through Nrf2/ARE Pathway in HepG2 Cells," *Antioxidants*, vol. 11, no. 4, p. 675, Mar. 2022, doi: 10.3390/antiox11040675.
- [62] D. Procházková, I. Boušová, and N. Wilhelmová, "Antioxidant and prooxidant properties of flavonoids," *Fitoterapia*, vol. 82, no. 4, pp. 513–523, Jun. 2011, doi: 10.1016/j.fitote.2011.01.018.

- [63] D. Dimić *et al.*, "Experimental and theoretical elucidation of structural and antioxidant properties of vanillylmandelic acid and its carboxylate anion," *Spectrochim Acta A Mol Biomol Spectrosc*, vol. 198, pp. 61–70, Jun. 2018, doi: 10.1016/j.saa.2018.02.063.
- [64] M. Topal *et al.*, "Antioxidant, antiradical, and anticholinergic properties of cynarin purified from the Illyrian thistle ( *Onopordum illyricum* L.)," *J Enzyme Inhib Med Chem*, vol. 31, no. 2, pp. 266–275, Mar. 2016, doi: 10.3109/14756366.2015.1018244.
- [65] N. J. Miller, C. Castelluccio, L. Tijburg, and C. Rice-Evans, "The antioxidant properties of theaflavins and their gallate esters - radical scavengers or metal chelators?," *FEBS Lett*, vol. 392, no. 1, pp. 40–44, Aug. 1996, doi: 10.1016/0014-5793(96)00780-6.
- [66] M. Shibano, K. Kakutani, M. Taniguchi, M. Yasuda, and K. Baba, "Antioxidant constituents in the dayflower (*Commelina communis* L.) and their  $\alpha$ -glucosidase-inhibitory activity," *J Nat Med*, vol. 62, no. 3, pp. 349–353, Jul. 2008, doi: 10.1007/s11418-008-0244-1.
- [67] Y. Ren *et al.*, "Juglanin ameliorates depression-like behavior in chronic unpredictable mild stress-induced mice by improving AMPK signaling," *J Funct Foods*, vol. 98, p. 105263, Nov. 2022, doi: 10.1016/j.jff.2022.105263.
- [68] Y. J. Hyun *et al.*, "3,4-Dicaffeoylquinic acid protects human keratinocytes against environmental oxidative damage," *J Funct Foods*, vol. 52, pp. 430–441, Jan. 2019, doi: 10.1016/j.jff.2018.11.026.
- [69] K. J. Lee, J. H. Choi, and H. G. Jeong, "Hepatoprotective and antioxidant effects of the coffee diterpenes kahweol and cafestol on carbon tetrachloride-induced liver damage in mice," *Food and Chemical Toxicology*, vol. 45, no. 11, pp. 2118–2125, Nov. 2007, doi: 10.1016/j.fct.2007.05.010.
- [70] A. Piazzon, U. Vrhovsek, D. Masuero, F. Mattivi, F. Mandoj, and M. Nardini, "Antioxidant Activity of Phenolic Acids and Their Metabolites: Synthesis and Antioxidant Properties of the Sulfate Derivatives of Ferulic and Caffeic Acids and of the Acyl Glucuronide of Ferulic Acid," *J Agric Food Chem*, vol. 60, no. 50, pp. 12312–12323, Dec. 2012, doi: 10.1021/jf304076z.
- [71] X. Zhao, R. Chen, Y. Shi, X. Zhang, C. Tian, and D. Xia, "Antioxidant and Anti-Inflammatory Activities of Six Flavonoids from *Smilax glabra* Roxb," *Molecules*, vol. 25, no. 22, p. 5295, Nov. 2020, doi: 10.3390/molecules25225295.
- [72] F. S. Youssef, M. L. Ashour, H. A. El-Beshbishy, A. Ahmed Hamza, A. N. B. Singab, and M. Wink, "Pinoresinol-4- O -  $\beta$  -D-glucopyranoside: a lignan from prunes ( *Prunus domestica* ) attenuates oxidative stress, hyperglycaemia and hepatic toxicity *in vitro* and *in vivo*," *Journal of Pharmacy and Pharmacology*, vol. 72, no. 12, pp. 1830–1839, Nov. 2020, doi: 10.1111/jphp.13358.

- [73] A. N. Khan *et al.*, "A Short Review on Glucogallin and its Pharmacological Activities," *Mini-Reviews in Medicinal Chemistry*, vol. 22, no. 22, pp. 2820–2830, Dec. 2022, doi: 10.2174/1389557522666220513150907.
- [74] H.-N. Chu *et al.*, "What Is the Relationship between Antioxidant Efficacy, Functional Composition, and Genetic Characteristics in Comparing Soybean Resources by Year?," *Antioxidants*, vol. 11, no. 11, p. 2249, Nov. 2022, doi: 10.3390/antiox11112249.
- [75] Y. Wang *et al.*, "A New Geniposidic Acid Derivative Exerts Antiaging Effects through Antioxidative Stress and Autophagy Induction," *Antioxidants*, vol. 10, no. 6, p. 987, Jun. 2021, doi: 10.3390/antiox10060987.
- [76] S. Chae *et al.*, "Antioxidant Activity of Isoacteoside from Clerodendron Trichotomum," *J Toxicol Environ Health A*, vol. 68, no. 5, pp. 389–400, Jan. 2005, doi: 10.1080/15287390590900750.
- [77] X.-J. Qu *et al.*, "Protective effects of Salvia plebeia compound homoplantagin in on hepatocyte injury," *Food and Chemical Toxicology*, vol. 47, no. 7, pp. 1710–1715, Jul. 2009, doi: 10.1016/j.fct.2009.04.032.
- [78] X. Han, "Protective effect of naringenin-7-O-glucoside against oxidative stress induced by doxorubicin in H9c2 cardiomyocytes," *Biosci Trends*, 2012, doi: 10.5582/bst.2012.v6.1.19.
- [79] M. Wójciak, M. Feldo, G. Borowski, T. Kubrak, B. J. Płachno, and I. Sowa, "Antioxidant Potential of Diosmin and Diosmetin against Oxidative Stress in Endothelial Cells," *Molecules*, vol. 27, no. 23, p. 8232, Nov. 2022, doi: 10.3390/molecules27238232.
- [80] "The Bioactive Effects of Chicoric Acid As a Functional Food Ingredient".
- [81] H. Wang *et al.*, "Aucubin alleviates oxidative stress and inflammation via Nrf2-mediated signaling activity in experimental traumatic brain injury," *J Neuroinflammation*, vol. 17, no. 1, p. 188, Dec. 2020, doi: 10.1186/s12974-020-01863-9.
- [82] A. Cherkas, S. Holota, T. Mdžinarashvili, R. Gabbianelli, and N. Zarkovic, "Glucose as a Major Antioxidant: When, What for and Why It Fails?," *Antioxidants*, vol. 9, no. 2, p. 140, Feb. 2020, doi: 10.3390/antiox9020140.
- [83] J. Zhu, G. Li, J. Zhou, Z. Xu, and J. Xu, "Cytoprotective effects and antioxidant activities of acteoside and various extracts of Clerodendrum cyrtophyllum Turcz leaves against t-BHP induced oxidative damage," *Sci Rep*, vol. 12, no. 1, p. 12630, Jul. 2022, doi: 10.1038/s41598-022-17038-w.
- [84] "Antioxidant effects and mechanism of silymarin in oxidative stress induced cardiovascular diseases".

- [85] T. Boeing *et al.*, "Antioxidant and anti-inflammatory effect of plumieride in dextran sulfate sodium-induced colitis in mice," *Biomedicine & Pharmacotherapy*, vol. 99, pp. 697–703, Mar. 2018, doi: 10.1016/j.biopha.2018.01.142.
- [86] X. Ao *et al.*, "Extraction, isolation and identification of four phenolic compounds from *Pleuroblastus amarus* shoots and their antioxidant and anti-inflammatory properties in vitro," *Food Chem*, vol. 374, p. 131743, Apr. 2022, doi: 10.1016/j.foodchem.2021.131743.
- [87] Y.-C. Cho, J. Park, and S. Cho, "Anti-Inflammatory and Anti-Oxidative Effects of luteolin-7-O-glucuronide in LPS-Stimulated Murine Macrophages through TAK1 Inhibition and Nrf2 Activation," *Int J Mol Sci*, vol. 21, no. 6, p. 2007, Mar. 2020, doi: 10.3390/ijms21062007.
- [88] K. A. Kang *et al.*, "Luteolin induces apoptotic cell death via antioxidant activity in human colon cancer cells," *Int J Oncol*, vol. 51, no. 4, pp. 1169–1178, Oct. 2017, doi: 10.3892/ijo.2017.4091.
- [89] W. Wang *et al.*, "Efficiency comparison of apigenin-7-O-glucoside and trolox in antioxidative stress and anti-inflammatory properties," *Journal of Pharmacy and Pharmacology*, vol. 72, no. 11, pp. 1645–1656, Oct. 2020, doi: 10.1111/jphp.13347.
- [90] A. Hameed, N. Iqbal, and S. A. Malik, "Effect of d-mannose on antioxidant defense and oxidative processes in etiolated wheat coleoptiles," *Acta Physiol Plant*, vol. 36, no. 1, pp. 161–167, Jan. 2014, doi: 10.1007/s11738-013-1396-5.
- [91] P. Kashyap, D. Shikha, M. Thakur, and A. Aneja, "Functionality of apigenin as a potent antioxidant with emphasis on bioavailability, metabolism, action mechanism and in vitro and in vivo studies: A review," *J Food Biochem*, vol. 46, no. 4, Apr. 2022, doi: 10.1111/jfbc.13950.
- [92] H. Han *et al.*, "Quercetin-3-O- $\alpha$ -L-rhamnopyranoside derived from the leaves of *Lindera aggregata* (Sims) Kosterm. evokes the autophagy-induced nuclear factor erythroid 2-related factor 2 antioxidant pathway in human umbilical vein endothelial cells," *Int J Mol Med*, Nov. 2018, doi: 10.3892/ijmm.2018.3976.
- [93] A. André, M. Leupin, M. Kneubühl, V. Pedan, and I. Chetschik, "Evolution of the Polyphenol and Terpene Content, Antioxidant Activity and Plant Morphology of Eight Different Fiber-Type Cultivars of *Cannabis sativa* L. Cultivated at Three Sowing Densities," *Plants*, vol. 9, no. 12, p. 1740, Dec. 2020, doi: 10.3390/plants9121740.
- [94] J.-H. Moon, T. Tsushida, K. Nakahara, and J. Terao, "Identification of quercetin 3-O- $\beta$ -D-glucuronide as an antioxidative metabolite in rat plasma after oral administration of quercetin," *Free Radic Biol Med*, vol. 30, no. 11, pp. 1274–1285, Jun. 2001, doi: 10.1016/S0891-5849(01)00522-6.

- [95] H. Kirmızibekmez *et al.*, "Secondary metabolites from the aerial parts of *Sideritis germanicopolitana* and their *in vitro* enzyme inhibitory activities," *Nat Prod Res*, vol. 35, no. 4, pp. 655–658, Feb. 2021, doi: 10.1080/14786419.2019.1586700.
- [96] S. K. Yoon, "Oleuropein as an Antioxidant and Liver Protect," in *The Liver*, Elsevier, 2018, pp. 323–335. doi: 10.1016/B978-0-12-803951-9.00027-6.
- [97] K. Iwai, N. Kishimoto, Y. Kakino, K. Mochida, and T. Fujita, "In Vitro Antioxidative Effects and Tyrosinase Inhibitory Activities of Seven Hydroxycinnamoyl Derivatives in Green Coffee Beans," *J Agric Food Chem*, vol. 52, no. 15, pp. 4893–4898, Jul. 2004, doi: 10.1021/jf040048m.
- [98] Y. Kumarasamy, P. J. Cox, M. Jaspars, L. Nahar, and S. D. Sarker, "Bioactivity of Hirsutanolol, Oregonin and Genkwanin, Isolated from the Seeds of *Alnus glutinosa* (Betulaceae)."
- [99] J. Ho and C.-Y. Hong, "Salvianolic acids: small compounds with multiple mechanisms for cardiovascular protection," *J Biomed Sci*, vol. 18, no. 1, p. 30, 2011, doi: 10.1186/1423-0127-18-30.
- [100] O. Danino, H. E. Gottlieb, S. Grossman, and M. Bergman, "Antioxidant activity of 1,3-dicaffeoylquinic acid isolated from *Inula viscosa*," *Food Research International*, vol. 42, no. 9, pp. 1273–1280, Nov. 2009, doi: 10.1016/j.foodres.2009.03.023.
- [101] S. Bakir, S. Kamiloglu, M. Tomas, and E. Capanoglu, "Tomato Polyphenolics: Putative Applications to Health and Disease," in *Polyphenols: Mechanisms of Action in Human Health and Disease*, Elsevier, 2018, pp. 93–102. doi: 10.1016/B978-0-12-813006-3.00009-X.
- [102] A. Braca, G. Fico, I. Morelli, F. de Simone, F. Tomè, and N. de Tommasi, "Antioxidant and free radical scavenging activity of flavonol glycosides from different *Aconitum* species," *J Ethnopharmacol*, vol. 86, no. 1, pp. 63–67, May 2003, doi: 10.1016/S0378-8741(03)00043-6.
- [103] Y. S. Song and C. M. Park, "Luteolin and luteolin-7-O-glucoside strengthen antioxidative potential through the modulation of Nrf2/MAPK mediated HO-1 signaling cascade in RAW 264.7 cells," *Food and Chemical Toxicology*, vol. 65, pp. 70–75, Mar. 2014, doi: 10.1016/j.fct.2013.12.017.
- [104] "Free Radical Scavenging and Antioxidant Activities of Silymarin Components".
- [105] A. Nugroho, H. Heryani, J. S. Choi, and H.-J. Park, "Identification and quantification of flavonoids in *Carica papaya* leaf and peroxynitrite-scavenging activity," *Asian Pac J Trop Biomed*, vol. 7, no. 3, pp. 208–213, Mar. 2017, doi: 10.1016/j.apjtb.2016.12.009.
- [106] A. Elmann, A. Telerman, H. Erlank, R. Ofir, Y. Kashman, and E. Beit-Yannai, "Achillolide A Protects Astrocytes against Oxidative Stress by Reducing Intracellular Reactive Oxygen Species and Interfering with Cell Signaling," *Molecules*, vol. 21, no. 3, p. 301, Mar. 2016, doi: 10.3390/molecules21030301.

- [107] Y. Wang *et al.*, "Variation in the Main Health-Promoting Compounds and Antioxidant Activity of Different Edible Parts of Purple Flowering Stalks (*Brassica campestris* var. *purpuraria*) and Green Flowering Stalks (*Brassica campestris* var. *campestris*)," *Plants*, vol. 11, no. 13, p. 1664, Jun. 2022, doi: 10.3390/plants11131664.
- [108] H. Parhiz, A. Roohbakhsh, F. Soltani, R. Rezaee, and M. Iranshahi, "Antioxidant and Anti-Inflammatory Properties of the Citrus Flavonoids Hesperidin and Hesperetin: An Updated Review of their Molecular Mechanisms and Experimental Models," *Phytotherapy Research*, vol. 29, no. 3, pp. 323–331, Mar. 2015, doi: 10.1002/ptr.5256.
- [109] A. John and H. Raza, "Azadirachtin Attenuates Lipopolysaccharide-Induced ROS Production, DNA Damage, and Apoptosis by Regulating JNK/Akt and AMPK/mTOR-Dependent Pathways in Rin-5F Pancreatic Beta Cells," *Biomedicines*, vol. 9, no. 12, p. 1943, Dec. 2021, doi: 10.3390/biomedicines9121943.
- [110] D.-W. Kim *et al.*, "Isorhamnetin-3-O-galactoside Protects against CCl<sub>4</sub>-Induced Hepatic Injury in Mice," *Biomol Ther (Seoul)*, vol. 20, no. 4, pp. 406–412, Jul. 2012, doi: 10.4062/biomolther.2012.20.4.406.
- [111] A. Sharma, S. Gupta, S. Chauhan, A. Nair, and P. Sharma, "ASTILBIN: A PROMISING UNEXPLORED COMPOUND WITH MULTIDIMENSIONAL MEDICINAL AND HEALTH BENEFITS," *Pharmacol Res*, vol. 158, p. 104894, Aug. 2020, doi: 10.1016/j.phrs.2020.104894.
- [112] M. Cuendet, O. Potterat, and K. Hostettmann, "Flavonoids and phenylpropanoid derivatives from *Campanula barbata*," *Phytochemistry*, vol. 56, no. 6, pp. 631–636, Mar. 2001, doi: 10.1016/S0031-9422(00)00423-4.
- [113] M. de la L. Cádiz-Gurrea, D. Pinto, C. Delerue-Matos, and F. Rodrigues, "Olive Fruit and Leaf Wastes as Bioactive Ingredients for Cosmetics—A Preliminary Study," *Antioxidants*, vol. 10, no. 2, p. 245, Feb. 2021, doi: 10.3390/antiox10020245.
- [114] J. Wang *et al.*, "Antitumor, antioxidant and anti-inflammatory activities of kaempferol and its corresponding glycosides and the enzymatic preparation of kaempferol," *PLoS One*, vol. 13, no. 5, p. e0197563, May 2018, doi: 10.1371/journal.pone.0197563.
- [115] F. C. Maiyo, R. Moodley, and M. Singh, "Cytotoxicity, Antioxidant and Apoptosis Studies of Quercetin-3-O Glucoside and 4-(?-D-Glucopyranosyl-1?-L-Rhamnopyranosyloxy)-Benzyl Isothiocyanate from *Moringa oleifera*," *Anticancer Agents Med Chem*, vol. 16, no. 5, pp. 648–656, Mar. 2016, doi: 10.2174/1871520615666151002110424.

- [116] V. Gayathri Devi, B. N. Rooban, V. Sasikala, V. Sahasranamam, and A. Abraham, "Isorhamnetin-3-glucoside alleviates oxidative stress and opacification in selenite cataract in vitro," *Toxicology in Vitro*, vol. 24, no. 6, pp. 1662–1669, Sep. 2010, doi: 10.1016/j.tiv.2010.05.021.
- [117] E. M. Ryan *et al.*, "Antioxidant properties of citric acid interfere with the uricase-based measurement of circulating uric acid," *J Pharm Biomed Anal*, vol. 164, pp. 460–466, Feb. 2019, doi: 10.1016/j.jpba.2018.11.011.
- [118] Z. Shojaeifard, B. Hemmateenejad, and A. R. Jassbi, "Chemometrics-based LC-UV-ESIMS analyses of 50 Salvia species for detecting their antioxidant constituents," *J Pharm Biomed Anal*, vol. 193, p. 113745, Jan. 2021, doi: 10.1016/j.jpba.2020.113745.
- [119] N. Terahara, I. Konczak, H. Ono, M. Yoshimoto, and O. Yamakawa, "Characterization of Acylated Anthocyanins in Callus Induced From Storage Root of Purple-Fleshed Sweet Potato, *Ipomoea batatas* L," *J Biomed Biotechnol*, vol. 2004, no. 5, pp. 279–286, 2004, doi: 10.1155/S1110724304406056.
- [120] R. A. Mendes *et al.*, "Evaluation of the antioxidant potential of myricetin 3-O- $\alpha$ -L-rhamnopyranoside and myricetin 4'-O- $\alpha$ -L-rhamnopyranoside through a computational study," *J Mol Model*, vol. 25, no. 4, p. 89, Apr. 2019, doi: 10.1007/s00894-019-3959-x.
- [121] N. P. A, B. A. K, S. Bhattu, S. H. K, G. S. K, and S. G. S, "Antioxidant profiling of C3 quercetin glycosides: Quercitrin, Quercetin 3- $\beta$ -D-glucoside and Quercetin 3-O-(6"-O-malonyl)- $\beta$ -Dglucoside in cell free environment," *Free Radicals and Antioxidants*, vol. 5, no. 2, pp. 90–100, Jun. 2015, doi: 10.5530/fra.2015.2.7.
- [122] J. G. Ganzon, L.-G. Chen, and C.-C. Wang, "4- O -Caffeoylquinic acid as an antioxidant marker for mulberry leaves rich in phenolic compounds," *J Food Drug Anal*, vol. 26, no. 3, pp. 985–993, Jul. 2018, doi: 10.1016/j.jfda.2017.11.011.
- [123] X. Ren *et al.*, "Isorhamnetin, Hispidulin, and Cirsimaritin Identified in *Tamarix ramosissima* Barks from Southern Xinjiang and Their Antioxidant and Antimicrobial Activities," *Molecules*, vol. 24, no. 3, p. 390, Jan. 2019, doi: 10.3390/molecules24030390.
- [124] Li, R. Tsao, R. Yang, C. Liu, H. Zhu, and J. C. Young, "Polyphenolic Profiles and Antioxidant Activities of Heartnut ( *Juglans ailanthifolia* Var . *cordiformis* ) and Persian Walnut ( *Juglans regia* L.)," *J Agric Food Chem*, vol. 54, no. 21, pp. 8033–8040, Oct. 2006, doi: 10.1021/jf0612171.
- [125] Y. Ma, Y. Shang, D. Zhu, C. Wang, Z. Zhong, and Z. Xu, "Facile Separation of 5- O -Galloylquinic Acid from Chinese Green Tea Extract using Mesoporous Zirconium Phosphate," *Phytochemical Analysis*, vol. 27, no. 3–4, pp. 153–157, May 2016, doi: 10.1002/pca.2610.
- [126] M. Xu, Z. Jin, J.-B. Ohm, P. Schwarz, J. Rao, and B. Chen, "Improvement of the Antioxidative Activity of Soluble Phenolic Compounds in Chickpea by Germination," *J Agric Food Chem*, vol. 66, no. 24, pp. 6179–6187, Jun. 2018, doi: 10.1021/acs.jafc.8b02208.



- [127] F. Topal *et al.*, "Antioxidant activity of taxifolin: an activity–structure relationship," *J Enzyme Inhib Med Chem*, vol. 31, no. 4, pp. 674–683, Jul. 2016, doi: 10.3109/14756366.2015.1057723.
- [128] M. Doseděl *et al.*, "Vitamin C—Sources, Physiological Role, Kinetics, Deficiency, Use, Toxicity, and Determination," *Nutrients*, vol. 13, no. 2, p. 615, Feb. 2021, doi: 10.3390/nu13020615.
- [129] H. Kirmizibekmez *et al.*, "Iridoid, phenylethanoid and flavonoid glycosides from *Sideritis trojana*," *Fitoterapia*, vol. 83, no. 1, pp. 130–136, Jan. 2012, doi: 10.1016/j.fitote.2011.10.003.
- [130] W. Hu *et al.*, "Apigenin-7-O- $\beta$ -glucuronide inhibits LPS-induced inflammation through the inactivation of AP-1 and MAPK signaling pathways in RAW 264.7 macrophages and protects mice against endotoxin shock," *Food Funct*, vol. 7, no. 2, pp. 1002–1013, 2016, doi: 10.1039/C5FO01212K.
- [131] T. Esposito *et al.*, "Study on *Ajuga reptans* Extract: A Natural Antioxidant in Microencapsulated Powder Form as an Active Ingredient for Nutraceutical or Pharmaceutical Purposes," *Pharmaceutics*, vol. 12, no. 7, p. 671, Jul. 2020, doi: 10.3390/pharmaceutics12070671.
- [132] H.-D. Lee, J. H. Kim, Q. Q. Pang, P.-M. Jung, E. J. Cho, and S. Lee, "Antioxidant Activity and Acteoside Analysis of *Abeliophyllum distichum*," *Antioxidants*, vol. 9, no. 11, p. 1148, Nov. 2020, doi: 10.3390/antiox9111148.
- [133] G. A. L. de Oliveira *et al.*, "Bergenin from *Peltophorum dubium*: Isolation, Characterization, and Antioxidant Activities in Non-Biological Systems and Erythrocytes," *Med Chem (Los Angeles)*, vol. 13, no. 6, Aug. 2017, doi: 10.2174/1573406413666170306120152.
- [134] A. Dawé *et al.*, "Flavonoids and triterpenes from *Combretum fragrans* with anti-inflammatory, antioxidant and antidiabetic potential," *Zeitschrift für Naturforschung C*, vol. 73, no. 5–6, pp. 211–219, Apr. 2018, doi: 10.1515/znc-2017-0166.
- [135] Y. T. Tung, W. C. Chang, P. S. Chen, T. C. Chang, and S. T. Chang, "Ultrasound-assisted extraction of phenolic antioxidants from *Acacia confusa* flowers and buds," *J Sep Sci*, vol. 34, no. 7, pp. 844–851, Apr. 2011, doi: 10.1002/jssc.201000820.
- [136] C. M. Park and Y.-S. Song, "Luteolin and luteolin-7- O -glucoside protect against acute liver injury through regulation of inflammatory mediators and antioxidative enzymes in GalN/LPS-induced hepatitic ICR mice," *Nutr Res Pract*, vol. 13, no. 6, p. 473, 2019, doi: 10.4162/nrp.2019.13.6.473.
- [137] G. Liu *et al.*, "Antioxidant capacity and interaction of endogenous phenolic compounds from tea seed oil," *Food Chem*, vol. 376, p. 131940, May 2022, doi: 10.1016/j.foodchem.2021.131940.

- [138] L. Jin, C. Chen, L. Huang, L. Bu, L. Zhang, and Q. Yang, "Salvianolic acid A blocks vasculogenic mimicry formation in human non-small cell lung cancer via PI3K/Akt/mTOR signalling," *Clin Exp Pharmacol Physiol*, vol. 48, no. 4, pp. 508–514, Apr. 2021, doi: 10.1111/1440-1681.13464.
- [139] K. P. Funh *et al.*, "Lithospermic acid B as an antioxidant-based protector of cultured ventricular myocytes and aortic endothelial cells of rabbits," *Life Sci*, vol. 53, no. 12, pp. PL189–PL193, Jan. 1993, doi: 10.1016/0024-3205(93)90129-Q.
- [140] Q. Li, P. Zhang, and Y. Cai, "Genkwanin suppresses MPP<sup>+</sup>-induced cytotoxicity by inhibiting TLR4/MyD88/NLRP3 inflammasome pathway in a cellular model of Parkinson's disease," *Neurotoxicology*, vol. 87, pp. 62–69, Dec. 2021, doi: 10.1016/j.neuro.2021.08.018.
- [141] J. Yan *et al.*, "Rhoifolin Ameliorates Osteoarthritis via Regulating Autophagy," *Front Pharmacol*, vol. 12, May 2021, doi: 10.3389/fphar.2021.661072.
- [142] N. Li, M. Xu, M. Wu, and G. Zhao, "Cinnamtannin A2 protects the renal injury by attenuates the altered expression of kidney injury molecule 1 (KIM-1) and neutrophil gelatinase-associated lipocalin (NGAL) expression in 5/6 nephrectomized rat model," *AMB Express*, vol. 10, no. 1, p. 87, Dec. 2020, doi: 10.1186/s13568-020-01022-6.
- [143] J. Choi, H. J. Kang, S. Z. Kim, T. O. Kwon, S.-I. Jeong, and S. il Jang, "Antioxidant effect of astragalin isolated from the leaves of *Morus alba* L. against free radical-induced oxidative hemolysis of human red blood cells," *Arch Pharm Res*, vol. 36, no. 7, pp. 912–917, Jul. 2013, doi: 10.1007/s12272-013-0090-x.
- [144] L. S. Frota *et al.*, "Antioxidant and anticholinesterase activities of amentoflavone isolated from *Ouratea fieldingiana* (Gardner) Engl. through *in vitro* and chemical-quantum studies," *J Biomol Struct Dyn*, pp. 1–11, Dec. 2021, doi: 10.1080/07391102.2021.2017353.
- [145] M. Imran *et al.*, "Kaempferol: A Key Emphasis to Its Anticancer Potential," *Molecules*, vol. 24, no. 12, p. 2277, Jun. 2019, doi: 10.3390/molecules24122277.
- [146] Y. Gao *et al.*, "Antioxidant Activity Evaluation of Dietary Flavonoid Hyperoside Using *Saccharomyces Cerevisiae* as a Model," *Molecules*, vol. 24, no. 4, p. 788, Feb. 2019, doi: 10.3390/molecules24040788.
- [147] Y. Deng *et al.*, "Kaempferol-3-O-Glucuronide Ameliorates Non-Alcoholic Steatohepatitis in High-Cholesterol-Diet-Induced Larval Zebrafish and HepG2 Cell Models via Regulating Oxidation Stress," *Life*, vol. 11, no. 5, p. 445, May 2021, doi: 10.3390/life11050445.
- [148] M. A. Aderogba, L. J. McGaw, A. O. Ogundaini, and J. N. Eloff, "Antioxidant activity and cytotoxicity study of the flavonol glycosides from *Bauhinia galpinii*," *Nat Prod Res*, vol. 21, no. 7, pp. 591–599, Jun. 2007, doi: 10.1080/14786410701369557.

- [149] T. Kassa, J. G. Whalin, M. P. Richards, and A. I. Alayash, "Caffeic acid: an antioxidant with novel antisickling properties," *FEBS Open Bio*, Sep. 2021, doi: 10.1002/2211-5463.13295.
- [150] V. Morocho, L. P. Valarezo, D. A. Tapia, L. Cartuche, N. Cumbicus, and G. Gilardoni, "A Rare Dirhamnosyl Flavonoid and Other Radical-Scavenging Metabolites from *Cynophalla mollis* (Kunth) J. Presl and *Colicodendron scabridum* (Kunt) Seem. (Capparaceae) of Ecuador," *Chem Biodivers*, vol. 18, no. 8, Aug. 2021, doi: 10.1002/cbdv.202100260.
- [151] S. P. Kamdi, A. Raval, and K. T. Nakhate, "Phloridzin attenuates lipopolysaccharide-induced cognitive impairment via antioxidant, anti-inflammatory and neuromodulatory activities," *Cytokine*, vol. 139, p. 155408, Mar. 2021, doi: 10.1016/j.cyto.2020.155408.
